# Supplementary material
Source: Research Square preprint supplement (doi:10.21203/rs.3.rs-10156756/v1)
Supplement: Supplementary file 1 [file 4178cc0e43459cb018a47080.xlsx]

## Sheet: Supp Table 1
Supplementary table 1: Dietary protein composition
	Unit	Pork	Soy	Casein	Method
Energy (cal/100g)	cal/100g	521	380	364	Calcul Atwater
energy (KJ/100g)	KJ/100g	2180	1590	1523	Calcul Atwater
Total Protein	g/100g	70.37	86.91	90.23	Combustion-Leco
Valine	g/100g	3.71	4.35	6.16	HPLC
Isoleucine	g/100g	3.49	4.21	4.89	HPLC
Leucine	g/100g	5.87	7.13	8.8	HPLC
Aspartic acid	g/100g	6.66	10.04	6.56	HPLC
Threonine	g/100g	3.25	3.35	4.04	HPLC
Serine	g/100g	2.75	4.47	5.33	HPLC
Glutamic acid	g/100g	10.84	16.78	20.72	HPLC
Glycine	g/100g	3.17	3.65	1.71	HPLC
Alanine	g/100g	4.04	3.75	2.84	HPLC
Methionine	g/100g	2.4	1.19	2.68	HPLC
Tyrosine	g/100g	2.48	3.29	5.04	HPLC
Phenylalanine	g/100g	2.89	4.68	4.78	HPLC
Lysine	g/100g	6.41	5.59	7.49	HPLC
Histidine	g/100g	2.95	2.27	2.65	HPLC
Arginine	g/100g	4.54	6.57	3.4	HPLC
Proline	g/100g	2.73	4.54	10.22	HPLC
Cystine	g/100g	0.94	0.93	0.37	HPLC
Tryptophan	g/100g	0.97	1.3	1.3	HPLC
Total sugars	g/100g	0	1.13	0.23	Calcul Atwater
Total dietary fiber	g/100g	0	1.9	0	Enzymatic/gravimetric
Total Fat	g/100g	26.58	3.11	0.36	Mojonnier
saturated fat	g/100g	9.51	0.8	0.22	Extraction / GC
MUFAs	g/100g	11.2	0.47	0.09	Extraction / GC
PUFAs	g/100g	4.63	1.68	0.02	Extraction / GC
ω3	g/100g	0.22	0.19	<0,01	Extraction / GC
ω6	g/100g	4.21	1.48	0.01	Extraction / GC
ω6:ω3	ratio	19.1364	7.78947	NA	Extraction / GC
trans fat	g/100g	0.07	0.02	0.02	Extraction / GC
cholesterol	mg/100g	195.1	<0.8	17.9	Saponification / GC
ash	%	3.08	3.51	1.43	Gravimetry (550 °C)
humidity	%	<3.00	5.35	8.97	Gravimetry (100 °C)
Total Calcul Atwater		100.03	101.91	101.22
Total mix Mass Spec method		96.67	94.23	99.34

## Sheet: Supp Table 2
Supplementary Table 2: Diets composition and energic content
		HFHS + Pork				LFLS+Pork
	Ingredients	Amount (g)	Energy provided (kcal)	Energy (%)	Macro Energy (%)	Amount (g)	Energy provided (kcal)	Energy (%)	Macro Energy (%)
Protein fraction	Pork	25.19	70.9048	14.7133	14.9623	19.1	53.7627	14.5815	14.9069
	L-cystine	0.3	1.2	0.24901		0.3	1.2	0.325463
Carbohydrate fraction	Starch	6.29	22.8956	4.75102	35.0325	61.5	223.86	60.7151	70.0158
	CHO from protein	0	0	0		0	0	0
	Fibers from protein	0	0	0		0	0	0
	Sucrose	34.3182	137.273	28.4853		6.54255	26.1702	7.09786
	Sucrose from mineral mix	3.1624	3.1624	0.656224			3.0208	0.819298
	Sucrose from vitamin mix	5.4936	5.4936	1.13997			5.1012	1.38354
	Mineral mix	6.7	(Counted in Carbohydrates)			6.4	(Counted in Carbohydrates)
	Vitamin mix	1.4	(Counted in Carbohydrates)			1.3	(Counted in Carbohydrates)
	Cellulose	5	0	0		4.9
Lipid fraction	Total added fat	20.08	180.72	37.5009	50.0052	1.1	9.9	2.68507	15.0773
	Lard	15.9	(Counted in total added fat)			0	(Counted in total added fat)
	Corn oil	4.18	(Counted in total added fat)			1.1	(Counted in total added fat)
	Fat from protein	6.6955	60.2595	12.5043		5.07678	45.691	12.3923
	Choline bitartrate	0.3				0.3
	BHT	0.03				0.03
	Total	99.6082	481.909	100	100	101.473	368.706	100	100
	kcal/g		4.83804				3.63355
	% fibers	5.01967				4.82889
		HFHS + Casein				LFLS+Casein
	Ingredients	Amount (g)	Energy provided (kcal)	Energy (%)	Macro Energy (%)	Amount (g)	Energy provided (kcal)	Energy (%)	Macro Energy (%)
Protein fraction	Casein	19.8	71.4622	14.7429	14.9905	14.7	53.0552	14.6814	15.0134
	L-cystine	0.3	1.2	0.247565		0.3	1.2	0.332062
Carbohydrate fraction	Starch	6.32	23.0048	4.74598	34.9867	60.19	219.092	60.6267	69.9618
	CHO from protein	0	0	0		0	0	0
	Fibers from protein	0	0	0		0	0	0
	Sucrose	34.4819	137.928	28.455		6.40319	25.6128	7.08753
	Sucrose from mineral mix	3.1624	3.1624	0.652415			3.0208	0.835912
	Sucrose from vitamin mix	5.4936	5.4936	1.13335			5.1012	1.4116
	Mineral mix	6.7	(Counted in Carbohydrates)			6.4	(Counted in Carbohydrates)
	Vitamin mix	1.4	(Counted in Carbohydrates)			1.3	(Counted in Carbohydrates)
	Cellulose	5	0	0		5
Lipid fraction	Total added fat	26.87	241.83	49.8904	50.0228	5.98	53.82	14.893	15.0248
	Lard	22.99	(Counted in total added fat)			5.07	(Counted in total added fat)
	Corn oil	3.88	(Counted in total added fat)			0.91	(Counted in total added fat)
	Fat from protein	0.07128	0.64152	0.132348			0.47628	0.131796
	Choline bitartrate	0.3				0.3
	BHT	0.03				0.03
	Total	101.202	484.722	100	100	100.603	361.378	100	100
	kcal/g		4.78965				3.59211
	% fibers	0.0494062				0.0497002
		HFHS + Soya				LFLS + Soya
	Ingredients	Amount (g)	Energy provided (kcal)	Energy (%)	Macro Energy (%)	Amount (g)	Energy provided (kcal)	Energy (%)	Macro Energy (%)
Protein fraction	Soy	20.7	71.9615	14.7493	15.0185	15.166	52.7231	14.6715	14.9973
	L-cystine	0.3	1.2	0.245954		0.3	1.2	0.33393
Carbohydrate fraction	Starch	5.6	20.384	4.28623	34.967	59.54	216.726	60.2765	69.9874
	CHO from protein	0.22826	0.91304	0.191989		0.171376	0.685503	0.190655
	Fibers from protein	0.3838	0.7676	0.161406		0.288154	0.576308	0.160285
	Sucrose	33.893	135.572	28.5073		6.38293	25.3362	7.10098
	Sucrose from mineral mix	0.7906	3.1624	0.652415		0.7552	3.0208	0.840613
	Sucrose from vitamin mix	1.3734	5.4936	1.13335		1.2753	5.1012	1.41954
	Mineral mix	6.7	(Counted in Carbohydrates)			6.4	(Counted in Carbohydrates)
	Vitamin mix	1.4	(Counted in Carbohydrates)			1.3	(Counted in Carbohydrates)
	Cellulose	4.6067	0	0		4.71185	0	0
Lipid fraction	Total added fat	26.46	238.14	48.8095	50.0145	5.527	49.743	13.8422	15.0235
	Lard	23.15	(Counted in total added fat)			5.05	(Counted in total added fat)
	Corn oil	3.31	(Counted in total added fat)			0.477	(Counted in total added fat)
	Fat from protein	0.64377	5.79393	1.18753		0.471663	4.24496	1.18127
	Choline bitartrate	0.3				0.3
	BHT	0.03				0.03
	Total	101.17	487.897	100	100	99.6089	359.357	73.6542	100
	kcal/g		4.82257				3.60768
	% fibers	0.049422				0.0501963
Details
Bold: Ingredient directly added. Others are subtotal from other ingredients
Diets from same background(HFHS or LFLS) are isocaloric	Direcl
Ratio macronutrients Prot/Carbs/Lipid : HFHS=15,35,50 et LFLS= 15,70,15
Ratio kcal% SAT:PUFA de 1.33 for all diets
For HFHS, ratio of 5,46 sucrose : 1 starch
For LFLS, ratio of 9,4 starch: 1 succrose
Fiber % w/w = 5%
Is assumed : Alphacell fibers have 0 caloric content. Fibers from soy have caloric content of 2kcal/g (Canadian Food Inspection Agency). CHO in Soy are counted as starch/complex sugar

## Sheet: Supp Table 3
Supplementary table 3: Diets detailed caloric distribution
	HFHS + pork	HFHS + casein	HFHS + soya	LFLS + pork	LFLS + casein	LFLS + soya
Protein(%kcal)	14.9623	14.9905	14.9953	14.9069	15.0134	15.0055
CHO(%kcal)	35.0325	34.9867	35.0077	70.0158	69.9618	69.971
sucrose	30.2814	30.2408	30.3274	9.3007	9.33504	9.3599
starch	4.75102	4.74598	4.28623	60.7151	60.6267	60.2765
CHO from protein	0	0	0.191989	0	0	0.190655
Fibers from protein	0	0	0.161406	0	0	0.160285
Fat(%kcal)	50.0052	50.0228	49.997	15.0773	15.0248	15.0235
saturated	15.655	15.6276	15.7143	4.78555	4.69701	4.78711
MUFAs	19.8716	19.9921	19.8636	5.91178	5.97163	5.85065
PUFAs	11.809	11.7225	11.7165	3.58171	3.54441	3.61108
SAT : PUFA	1.32568	1.33611	1.33423	1.33611	1.32519	1.32567
Total	100	100	100	100	100	100
kcal/g	4.83804	4.78965	4.82257	3.63355	3.59211	3.60768
Fibers (g/100g)	5.01967	4.94062	4.9422	4.82889	4.97002	5.01963

## Sheet: Supp Table 4
Supplementary table 4: Overall Soy to casein effect adjusted for diet
genename	baseMean	log2FoldChange	lfcSE	stat	pvalue	padj	Gene_fullname	sampleID	ENTREZID	EnsID	KEGG_category	Biological_Process	Cellular_Compartment	Metabolic_Function
Cyp2c53-ps	28.6807	-1.98846	0.30566	-6.50545	7.74601e-11	7.29578e-08	cytochrome P450, family 2, subfamily c, polypeptide 53, pseudogene	ENSMUSG00000093610.7	638988	ENSMUSG00000121373
Scara5	173.714	-1.87225	0.365771	-5.11863	3.07764e-07	6.84044e-05	scavenger receptor class A, member 5	ENSMUSG00000022032.14	71145	ENSMUSG00000022032		monoatomic ion transport; iron ion transport; intracellular iron ion homeostasis; endocytosis; cellular response to heat; iron ion transmembrane transport; protein homotrimerization	plasma membrane; cell surface; membrane; endocytic vesicle membrane	protein binding; ferritin receptor activity
Orm3	215.884	-1.47787	0.334069	-4.42385	9.69588e-06	0.00107751	orosomucoid 3	ENSMUSG00000028359.4	18407	ENSMUSG00000028359		acute inflammatory response; regulation of immune system process; acute-phase response	extracellular region; extracellular space	molecular_function; small molecule binding
Mt1	3011.6	-1.42642	0.321638	-4.43488	9.21255e-06	0.00104086	metallothionein 1	ENSMUSG00000031765.7	17748	ENSMUSG00000031765	Mineral absorption	intracellular zinc ion homeostasis; nitric oxide mediated signal transduction; detoxification of copper ion; intracellular monoatomic cation homeostasis; negative regulation of neuron apoptotic process; negative regulation of growth; cellular response to chromate; cellular response to cadmium ion; cellular response to copper ion; cellular response to zinc ion	nucleus; cytoplasm; lysosome; cytosol	copper ion binding; zinc ion binding; metal ion binding
Cyp2b10	1075.4	-1.34987	0.324766	-4.15643	3.23264e-05	0.00243887	cytochrome P450, family 2, subfamily b, polypeptide 10	ENSMUSG00000030483.14	13088	ENSMUSG00000030483	Steroid hormone biosynthesis; Arachidonic acid metabolism; Retinol metabolism; Metabolic pathways; Chemical carcinogenesis - receptor activation	xenobiotic metabolic process; steroid metabolic process; response to bacterium; epoxygenase P450 pathway; xenobiotic catabolic process; ketone metabolic process	cytoplasm; mitochondrial inner membrane; endoplasmic reticulum; endoplasmic reticulum membrane; membrane; intracellular membrane-bounded organelle	monooxygenase activity; iron ion binding; testosterone 16-alpha-hydroxylase activity; arachidonate epoxygenase activity; steroid hydroxylase activity; oxidoreductase activity; oxidoreductase activity, acting on paired donors, with incorporation or reduction of molecular oxygen; oxidoreductase activity, acting on paired donors, with incorporation or reduction of molecular oxygen, reduced flavin or…
Tff3	36.5373	-1.26407	0.384019	-3.29168	0.000995921	0.0238564	trefoil factor 3, intestinal	ENSMUSG00000024029.4	21786	ENSMUSG00000024029		regulation of glucose metabolic process; maintenance of gastrointestinal epithelium	extracellular region; extracellular space; cytoplasm; secretory granule	identical protein binding
Slc43a1	241.351	-1.25829	0.162388	-7.74864	9.28789e-15	2.5185e-11	solute carrier family 43, member 1	ENSMUSG00000027075.16	72401	ENSMUSG00000027075		amino acid transport; neutral amino acid transport; L-amino acid transport; isoleucine transport; L-leucine transport; negative regulation of amino acid transport; transmembrane transport; L-valine transmembrane transport; negative regulation of L-leucine import across plasma membrane	endoplasmic reticulum; endoplasmic reticulum membrane; plasma membrane; membrane; apical plasma membrane; podocyte foot	L-valine transmembrane transporter activity; neutral L-amino acid transmembrane transporter activity; L-amino acid transmembrane transporter activity; L-isoleucine transmembrane transporter activity; L-leucine transmembrane transporter activity; transmembrane transporter activity
Smpd3	196.398	-1.24813	0.268272	-4.65249	3.27949e-06	0.000483297	sphingomyelin phosphodiesterase 3, neutral	ENSMUSG00000031906.8	58994	ENSMUSG00000031906	Sphingolipid metabolism; Metabolic pathways	skeletal system development; ossification; endochondral ossification; chondrocyte development; hematopoietic progenitor cell differentiation; regulation of leukocyte migration; chondrocyte development involved in endochondral bone morphogenesis; lipid metabolic process; sphingolipid metabolic process; ceramide metabolic process; sphingomyelin metabolic process; sphingomyelin catabolic process; si…	Golgi cis cisterna; Golgi membrane; extracellular region; cytoplasm; Golgi apparatus; plasma membrane; membrane	phosphatidylserine binding; catalytic activity; sphingomyelin phosphodiesterase activity; protein binding; phosphoric diester hydrolase activity; hydrolase activity; identical protein binding; metal ion binding; neutral sphingomyelin phosphodiesterase activity; phosphatidic acid binding
Slc2a4	31.688	-1.23754	0.288329	-4.29212	1.76973e-05	0.00163224	solute carrier family 2 (facilitated glucose transporter), member 4	ENSMUSG00000018566.14	20528	ENSMUSG00000018566	FoxO signaling pathway; AMPK signaling pathway; Insulin signaling pathway; Adipocytokine signaling pathway; Type II diabetes mellitus; Insulin resistance; Diabetic cardiomyopathy	learning or memory; short-term memory; long-term memory; amylopectin biosynthetic process; positive regulation of brain-derived neurotrophic factor receptor signaling pathway; cellular response to insulin stimulus; glucose homeostasis; glucose import in response to insulin stimulus; response to ethanol; D-glucose import; brown fat cell differentiation; transmembrane transport; dehydroascorbic aci…	cytoplasm; endosome; multivesicular body; trans-Golgi network; cytosol; plasma membrane; clathrin-coated pit; external side of plasma membrane; cell surface; endomembrane system; vesicle membrane; membrane; sarcoplasmic reticulum; clathrin-coated vesicle; trans-Golgi network transport vesicle; T-tubule; cytoplasmic vesicle membrane; vesicle; insulin-responsive compartment; sarcolemma; membrane ra…	insulin-responsive D-glucose:proton symporter activity; protein binding; D-glucose uniporter activity; transmembrane transporter activity; D-glucose transmembrane transporter activity
Fabp5	619.985	-1.22831	0.276498	-4.44238	8.8969e-06	0.00102113	fatty acid binding protein 5, epidermal	ENSMUSG00000027533.10	16592	ENSMUSG00000027533	PPAR signaling pathway	glucose metabolic process; lipid metabolic process; phosphatidylcholine biosynthetic process; lipid transport; negative regulation of D-glucose transmembrane transport; fatty acid transport; long-chain fatty acid transport; regulation of prostaglandin biosynthetic process; positive regulation of peroxisome proliferator activated receptor signaling pathway; glucose homeostasis; regulation of senso…	extracellular region; extracellular space; nucleus; cytoplasm; cytosol; postsynaptic density; synapse; glutamatergic synapse; postsynaptic density, intracellular component; postsynaptic cytosol	retinoic acid binding; long-chain fatty acid transmembrane transporter activity; fatty acid binding; lipid binding; identical protein binding
Socs3	460.179	-1.14228	0.283436	-4.0301	5.5752e-05	0.00351575	suppressor of cytokine signaling 3	ENSMUSG00000053113.3	12702	ENSMUSG00000053113	Ubiquitin mediated proteolysis; Osteoclast differentiation; JAK-STAT signaling pathway; TNF signaling pathway; Insulin signaling pathway; Prolactin signaling pathway; Adipocytokine signaling pathway; Type II diabetes mellitus; Insulin resistance; Non-alcoholic fatty liver disease; Growth hormone synthesis, secretion and action; Hepatitis C; Influenza A; Herpes simplex virus 1 infection	cell surface receptor signaling pathway via JAK-STAT; negative regulation of signal transduction; protein ubiquitination; cytokine-mediated signaling pathway; intracellular signal transduction; positive regulation of cell differentiation; negative regulation of receptor signaling pathway via JAK-STAT; negative regulation of insulin receptor signaling pathway; negative regulation of inflammatory r…	cytosol; cytoplasmic side of plasma membrane	phosphotyrosine residue binding; cytokine receptor binding; protein binding; protein tyrosine kinase inhibitor activity; miRNA binding
Ighm	549.157	-1.13642	0.332458	-3.41825	0.000630252	0.0179317	immunoglobulin heavy constant mu	ENSMUSG00000076617.9	16019	ENSMUSG00000076617		adaptive immune response; pre-B cell allelic exclusion; B cell affinity maturation; humoral immune response mediated by circulating immunoglobulin; regulation of immunoglobulin production; complement activation, classical pathway; immunoglobulin mediated immune response; antibacterial humoral response; antigen processing and presentation; regulation of cell morphogenesis; positive regulation of B…	extracellular region; extracellular space; cytoplasm; plasma membrane; external side of plasma membrane; cell surface; membrane; B cell receptor complex; immunoglobulin complex, circulating; perinuclear region of cytoplasm; IgM B cell receptor complex; pentameric IgM immunoglobulin complex; hexameric IgM immunoglobulin complex	single-stranded DNA binding; antigen binding; transmembrane signaling receptor activity; protein binding; phosphatidylcholine binding; immunoglobulin receptor binding; identical protein binding; peptidoglycan binding
Pnpla5	13.6339	-1.13125	0.460358	-2.45733	0.0139972	0.128226	patatin-like phospholipase domain containing 5	ENSMUSG00000018868.3	75772	ENSMUSG00000018868		lipid metabolic process; lipid catabolic process; triglyceride catabolic process; lipid homeostasis	cytoplasm; lipid droplet; membrane	triacylglycerol lipase activity; hydrolase activity
Fmo3	16.3269	-1.11029	0.328341	-3.38153	0.000720844	0.0194489	flavin containing monooxygenase 3	ENSMUSG00000026691.10	14262	ENSMUSG00000026691	Taurine and hypotaurine metabolism; Drug metabolism - cytochrome P450; Metabolic pathways	xenobiotic metabolic process; taurine biosynthetic process	endoplasmic reticulum; endoplasmic reticulum membrane; membrane	monooxygenase activity; N,N-dimethylaniline monooxygenase activity; oxidoreductase activity; amino acid binding; oxidoreductase activity, acting on paired donors, with incorporation or reduction of molecular oxygen, NAD(P)H as one donor, and incorporation of one atom of oxygen; trimethylamine monooxygenase activity; albendazole monooxygenase activity; hypotaurine monooxygenase activity; flavin ad…
Mup7	17226.2	-1.10908	0.381172	-2.90965	0.00361833	0.0574858	major urinary protein 7	ENSMUSG00000073842.10	100041658	ENSMUSG00000073842		biological_process	extracellular region; extracellular space	molecular_function; odorant binding; pheromone binding; small molecule binding
Gm7652	92.2156	-1.10396	0.262203	-4.21034	2.54988e-05	0.00203361	UDP-glucuronosyltransferase 2A1-like	ENSMUSG00000106303.1	102639104	ENSMUSG00000106303
Onecut1	284.067	-1.08958	0.312708	-3.48435	0.000493333	0.015236	one cut domain, family member 1	ENSMUSG00000043013.10	15379	ENSMUSG00000043013	Signaling pathways regulating pluripotency of stem cells; Maturity onset diabetes of the young	liver development; regulation of cell-matrix adhesion; epithelial cell development; type B pancreatic cell differentiation; pancreatic A cell differentiation; pancreatic D cell differentiation; glucose metabolic process; regulation of transcription by RNA polymerase II; Notch signaling pathway; endoderm development; anatomical structure morphogenesis; B cell differentiation; positive regulation o…	nucleus; nucleoplasm	RNA polymerase II cis-regulatory region sequence-specific DNA binding; DNA-binding transcription factor activity, RNA polymerase II-specific; DNA-binding transcription activator activity, RNA polymerase II-specific; DNA binding; chromatin binding; DNA-binding transcription factor activity; sequence-specific double-stranded DNA binding
Gm42796	22.403	-1.08855	0.288181	-3.77733	0.000158521	0.00700073		ENSMUSG00000105192.1		ENSMUSG00000105192
Chrna4	424.64	-1.07314	0.340136	-3.15504	0.00160479	0.0334161	cholinergic receptor, nicotinic, alpha polypeptide 4	ENSMUSG00000027577.14	11438	ENSMUSG00000027577	Neuroactive ligand-receptor interaction; Neuroactive ligand signaling; Cholinergic synapse; Nicotine addiction; Chemical carcinogenesis - receptor activation	response to hypoxia; DNA repair; monoatomic ion transport; calcium ion transport; response to oxidative stress; signal transduction; synaptic transmission, cholinergic; neuromuscular synaptic transmission; respiratory gaseous exchange by respiratory system; locomotory behavior; regulation of dopamine secretion; neuronal action potential; sensory perception of pain; monoatomic ion transmembrane tr…	plasma membrane; acetylcholine-gated channel complex; external side of plasma membrane; membrane; dendrite; protein-containing complex; cation channel complex; presynaptic membrane; neuron projection; neuronal cell body; synapse; postsynaptic membrane; synaptic membrane; dopaminergic synapse; neurotransmitter receptor complex; cholinergic synapse; postsynaptic specialization membrane	transmembrane signaling receptor activity; monoatomic ion channel activity; extracellular ligand-gated monoatomic ion channel activity; protein binding; acetylcholine receptor activity; acetylcholine-gated monoatomic cation-selective channel activity; acetylcholine binding; protein-containing complex binding; metal ion binding; quaternary ammonium group binding; ATP-dependent chromatin remodeler …
Adgrf1	92.5244	-1.05569	0.305914	-3.45095	0.000558618	0.0164793	adhesion G protein-coupled receptor F1	ENSMUSG00000041293.5	77596	ENSMUSG00000041293		energy reserve metabolic process; signal transduction; cell surface receptor signaling pathway; G protein-coupled receptor signaling pathway; adenylate cyclase-activating G protein-coupled receptor signaling pathway; synapse assembly; memory; regulation of lipid metabolic process; neuron projection development; fat cell differentiation	plasma membrane; membrane; cytoplasmic vesicle	transmembrane signaling receptor activity; G protein-coupled receptor activity; protein binding
1700018L02Rik	126.76	-1.05177	0.231292	-4.54738	5.43176e-06	0.000708114	RIKEN cDNA 1700018L02 gene	ENSMUSG00000100075.1	67329	ENSMUSG00000100075
Jchain	39.0256	-1.04467	0.265828	-3.92988	8.49898e-05	0.00451879	immunoglobulin joining chain	ENSMUSG00000067149.6	16069	ENSMUSG00000067149		adaptive immune response; glomerular filtration; humoral immune response; antibacterial humoral response; innate immune response; positive regulation of respiratory burst; protein-containing complex assembly	extracellular region; extracellular space; monomeric IgA immunoglobulin complex; dimeric IgA immunoglobulin complex; secretory IgA immunoglobulin complex; secretory dimeric IgA immunoglobulin complex; pentameric IgM immunoglobulin complex	single-stranded DNA binding; antigen binding; IgA binding; protein-macromolecule adaptor activity; phosphatidylcholine binding; immunoglobulin receptor binding; protein homodimerization activity; peptidoglycan binding
Igkc	219.531	-1.02245	0.348305	-2.93552	0.00332994	0.0542636	immunoglobulin kappa constant	ENSMUSG00000076609.2	16071	ENSMUSG00000076609		adaptive immune response; B cell differentiation	extracellular region; plasma membrane; alpha-beta T cell receptor complex; IgG immunoglobulin complex
Socs2	411.842	-0.994581	0.243911	-4.07764	4.54956e-05	0.00309406	suppressor of cytokine signaling 2	ENSMUSG00000020027.18	216233	ENSMUSG00000020027	JAK-STAT signaling pathway; Insulin signaling pathway; Prolactin signaling pathway; Type II diabetes mellitus; Growth hormone synthesis, secretion and action	lactation; negative regulation of signal transduction; protein ubiquitination; cytokine-mediated signaling pathway; response to estradiol; cellular response to hormone stimulus; intracellular signal transduction; erythropoietin-mediated signaling pathway; regulation of multicellular organism growth; negative regulation of multicellular organism growth; proteasome-mediated ubiquitin-dependent prot…	cytoplasm; Cul5-RING ubiquitin ligase complex	cytokine receptor binding; growth hormone receptor binding; insulin-like growth factor receptor binding; protein binding; phosphorylation-dependent protein binding; ubiquitin-like ligase-substrate adaptor activity
Chic1	45.1515	-0.993258	0.163791	-6.06419	1.3262e-09	7.49193e-07	cysteine-rich hydrophobic domain 1	ENSMUSG00000031327.10	12212	ENSMUSG00000031327			plasma membrane; membrane; cytoplasmic vesicle	molecular_function
Etnppl	2890.69	0.754396	0.172801	4.36569	1.2672e-05	0.00130823	ethanolamine phosphate phospholyase	ENSMUSG00000019232.14	71760	ENSMUSG00000019232	Glycerophospholipid metabolism; Metabolic pathways	phospholipid transfer to membrane; biological_process; response to food; lipid homeostasis; cellular response to glucocorticoid stimulus; ceramide phosphoethanolamine catabolic process	mitochondrion; membrane	molecular_function; transaminase activity; lyase activity; pyridoxal phosphate binding; ethanolamine-phosphate phospho-lyase activity
Cish	450.281	-0.9697	0.366406	-2.64652	0.00813243	0.0961017	cytokine inducible SH2-containing protein	ENSMUSG00000032578.7	12700	ENSMUSG00000032578	JAK-STAT signaling pathway; Prolactin signaling pathway	negative regulation of cytokine-mediated signaling pathway; negative regulation of signal transduction; protein ubiquitination; cytokine-mediated signaling pathway; intracellular signal transduction; negative regulation of receptor signaling pathway via JAK-STAT	plasma membrane	cytokine receptor binding; protein binding
Ttc39aos1	23.5612	-0.968866	0.32679	-2.9648	0.00302882	0.0512029	Ttc39a opposite strand RNA 1	ENSMUSG00000085873.1	102635290	ENSMUSG00000085873
Ly6d	62.1637	-0.96278	0.384145	-2.50629	0.0122004	0.117648	lymphocyte antigen 6 family member D	ENSMUSG00000034634.7	17068	ENSMUSG00000034634		lymphocyte differentiation; response to stilbenoid	plasma membrane; cell surface; membrane; side of membrane
Myom3	15.1949	-0.958305	0.234231	-4.09128	4.28991e-05	0.00299807	myomesin family, member 3	ENSMUSG00000037139.15	242702	ENSMUSG00000037139	Cytoskeleton in muscle cells	sarcomere organization	cytoplasm; M band	identical protein binding; protein homodimerization activity
Eif4ebp3	175.162	-0.930833	0.246	-3.78387	0.00015441	0.00688648	eukaryotic translation initiation factor 4E binding protein 3	ENSMUSG00000090264.1	108112	ENSMUSG00000090264		regulation of translation; negative regulation of translation; negative regulation of translational initiation	nucleus; cytoplasm	eukaryotic initiation factor 4E binding; translation repressor activity
Xirp1	28.7656	-0.924531	0.206574	-4.47553	7.62215e-06	0.000914523	xin actin-binding repeat containing 1	ENSMUSG00000079243.2	22437	ENSMUSG00000079243	Cytoskeleton in muscle cells	heart morphogenesis; actin filament organization; Notch signaling pathway; intracellular protein localization; negative regulation of cell population proliferation; myoblast differentiation involved in skeletal muscle regeneration; satellite cell activation involved in skeletal muscle regeneration; actin cytoskeleton organization; regulation of membrane potential; sarcomere organization; cardiac …	stress fiber; adherens junction; fascia adherens; focal adhesion; intercalated disc; cell junction; desmosome; anchoring junction	actin binding; filamin binding; actin filament binding
Gbp11	323.517	-0.918251	0.255928	-3.58792	0.000333322	0.011461	guanylate binding protein 11	ENSMUSG00000092021.8	634650	ENSMUSG00000092021
E2f8	231.774	-0.903826	0.21298	-4.24371	2.19857e-05	0.00185144	E2F transcription factor 8	ENSMUSG00000046179.17	108961	ENSMUSG00000046179		negative regulation of transcription by RNA polymerase II; placenta development; sprouting angiogenesis; regulation of DNA-templated transcription; regulation of transcription by RNA polymerase II; negative regulation of cytokinesis; positive regulation of DNA endoreduplication; cell cycle comprising mitosis without cytokinesis; positive regulation of transcription by RNA polymerase II; fibroblas…	nucleus; nucleoplasm; transcription regulator complex; nucleolus; cytosol; RNA polymerase II transcription regulator complex	RNA polymerase II cis-regulatory region sequence-specific DNA binding; DNA-binding transcription factor activity, RNA polymerase II-specific; cis-regulatory region sequence-specific DNA binding; DNA-binding transcription repressor activity; DNA-binding transcription repressor activity, RNA polymerase II-specific; DNA binding; DNA-binding transcription factor activity; identical protein binding; s…
Nos1ap	57.9209	-0.902365	0.175687	-5.13622	2.80319e-07	6.44163e-05	nitric oxide synthase 1 (neuronal) adaptor protein	ENSMUSG00000038473.14	70729	ENSMUSG00000038473	Circadian entrainment	regulation of heart rate by chemical signal; regulation of ventricular cardiac muscle cell membrane repolarization; postsynaptic actin cytoskeleton organization	podosome; nucleus; mitochondrion; cytosol; caveola; Z disc; filopodium; T-tubule; nuclear membrane; sarcoplasmic reticulum membrane; cell projection; anchoring junction; presynapse; postsynapse; glutamatergic synapse	protease binding; PDZ domain binding; mitogen-activated protein kinase kinase binding; signaling adaptor activity; nitric-oxide synthase binding
Gm15653	13.1279	-0.882741	0.300568	-2.93691	0.00331498	0.0542387	40S ribosomal protein S2 pseudogene	ENSMUSG00000082039.2	100862249	ENSMUSG00000082039
Gadd45g	818.221	-0.865558	0.299145	-2.89344	0.0038105	0.0597948	growth arrest and DNA-damage-inducible 45 gamma	ENSMUSG00000021453.2	23882	ENSMUSG00000021453	MAPK signaling pathway; NF-kappa B signaling pathway; FoxO signaling pathway; Cell cycle; p53 signaling pathway; Apoptosis; Cellular senescence; Epstein-Barr virus infection; Pathways in cancer; Transcriptional misregulation in cancer; Colorectal cancer; Pancreatic cancer; Endometrial cancer; Glioma; Thyroid cancer; Basal cell carcinoma; Melanoma; Chronic myeloid leukemia; Small cell lung cancer;…	apoptotic process; cell differentiation; positive regulation of apoptotic process; positive regulation of MAPK cascade; T-helper 1 cell differentiation; positive regulation of JNK cascade; regulation of cell cycle; positive regulation of cold-induced thermogenesis; positive regulation of p38MAPK cascade	nucleus; cytoplasm	protein binding; identical protein binding
Gm21049	22.8002	-0.8639	0.20501	-4.21394	2.50955e-05	0.00201328	UDP glucuronosyltransferase 2 family, polypeptide B36 pseudogene	ENSMUSG00000106397.1	100534381	ENSMUSG00000106397
Phospho1	44.0491	0.521134	0.155291	3.35586	0.000791191	0.0205302	phosphatase, orphan 1	ENSMUSG00000050860.6	237928	ENSMUSG00000050860	Glycerophospholipid metabolism; Metabolic pathways	endochondral ossification; bone mineralization; regulation of bone mineralization; bone mineralization involved in bone maturation	extracellular matrix; extracellular membrane-bounded organelle	pyrophosphatase activity; hydrolase activity; phosphatase activity; metal ion binding; phosphocholine phosphatase activity; phosphoethanolamine phosphatase activity
Mup-ps20	39.8842	-0.86321	0.364186	-2.37025	0.0177762	0.148314		ENSMUSG00000084309.1		ENSMUSG00000084309
Acpp	195.117	-0.856122	0.206047	-4.15498	3.25312e-05	0.00243887		ENSMUSG00000032561.14
Rian	17.9819	-0.847904	0.212212	-3.99554	6.45462e-05	0.00387495	RNA imprinted and accumulated in nucleus	ENSMUSG00000097451.9	75745	ENSMUSG00000097451
Slc37a1	68.465	-0.847898	0.168859	-5.02133	5.13151e-07	0.000100183	solute carrier family 37 (glycerol-3-phosphate transporter), member 1	ENSMUSG00000024036.15	224674	ENSMUSG00000024036		glucose-6-phosphate transport; phosphate ion transmembrane transport; transmembrane transport	endoplasmic reticulum; endoplasmic reticulum membrane; membrane; organelle membrane	antiporter activity; transmembrane transporter activity; glucose 6-phosphate:phosphate antiporter activity
Ttc39a	64.1312	-0.840543	0.296327	-2.83654	0.00456059	0.0668095	tetratricopeptide repeat domain 39A	ENSMUSG00000028555.15	230603	ENSMUSG00000028555		biological_process	centrosome	molecular_function
Cyp17a1	898.365	-0.837468	0.249067	-3.36242	0.000772622	0.0203181	cytochrome P450, family 17, subfamily a, polypeptide 1	ENSMUSG00000003555.7	13074	ENSMUSG00000003555	Steroid hormone biosynthesis; Metabolic pathways; Ovarian steroidogenesis; Prolactin signaling pathway; Cortisol synthesis and secretion; Cushing syndrome	lipid metabolic process; steroid biosynthetic process; androgen biosynthetic process; glucocorticoid biosynthetic process; steroid metabolic process; cortisol biosynthetic process; hormone biosynthetic process; progesterone metabolic process; positive regulation of steroid hormone biosynthetic process	mitochondrion; endoplasmic reticulum; endoplasmic reticulum membrane; membrane; axon; cell projection; neuronal cell body	monooxygenase activity; steroid 17-alpha-monooxygenase activity; iron ion binding; oxidoreductase activity; oxidoreductase activity, acting on paired donors, with incorporation or reduction of molecular oxygen; oxidoreductase activity, acting on paired donors, with incorporation or reduction of molecular oxygen, reduced flavin or flavoprotein as one donor, and incorporation of one atom of oxygen;…
Fgl1	5316	-0.83461	0.251867	-3.31369	0.000920726	0.02267	fibrinogen-like protein 1	ENSMUSG00000031594.9	234199	ENSMUSG00000031594		adaptive immune response; immune system process; blood coagulation; cholesterol metabolic process; regulation of glucose metabolic process; response to stilbenoid; regulation of immune response; negative regulation of T cell activation; adipose tissue development; hepatocyte proliferation	extracellular region; extracellular space; extracellular matrix	protein binding; identical protein binding
Mup1	817.779	-0.832307	0.354651	-2.34683	0.0189337	0.15398	major urinary protein 1	ENSMUSG00000078683.9	17840	ENSMUSG00000078683		energy reserve metabolic process; mitochondrion organization; signal transduction; insulin receptor signaling pathway; aerobic respiration; cellular response to starvation; positive regulation of gene expression; negative regulation of lipid storage; positive regulation of glucose metabolic process; heat generation; response to stilbenoid; glucose homeostasis; locomotor rhythm; negative regulatio…	extracellular region; extracellular space; nucleus; cytosol	insulin receptor activity; pheromone activity; odorant binding; pheromone binding; small molecule binding
Apoa4	11958.7	-0.823773	0.255112	-3.22906	0.00124198	0.0278327	apolipoprotein A-IV	ENSMUSG00000032080.6	11808	ENSMUSG00000032080	Fat digestion and absorption; Vitamin digestion and absorption; Cholesterol metabolism; Lipid and atherosclerosis	innate immune response in mucosa; lipid transport; response to stress; response to lipid hydroperoxide; leukocyte cell-cell adhesion; cholesterol metabolic process; positive regulation of triglyceride catabolic process; peripheral nervous system axon regeneration; lipid catabolic process; removal of superoxide radicals; regulation of intestinal cholesterol absorption; regulation of cholesterol tr…	extracellular region; extracellular space; cytosol; cell surface; very-low-density lipoprotein particle; low-density lipoprotein particle; high-density lipoprotein particle; chylomicron; synapse; extracellular vesicle	copper ion binding; phospholipid binding; lipid binding; antioxidant activity; phosphatidylcholine binding; identical protein binding; protein homodimerization activity; phosphatidylcholine-sterol O-acyltransferase activator activity; cholesterol transfer activity
Gm16348	56.9444	-0.822636	0.203021	-4.05198	5.07857e-05	0.00332634	predicted gene 16348	ENSMUSG00000085445.1	102640962	ENSMUSG00000085445
Syne4	51.9929	-0.813057	0.176364	-4.61011	4.02459e-06	0.000568389	spectrin repeat containing, nuclear envelope family member 4	ENSMUSG00000019737.14	233066	ENSMUSG00000019737		establishment of epithelial cell apical/basal polarity	nucleus; nuclear envelope; nuclear outer membrane; membrane; meiotic nuclear membrane microtubule tethering complex	protein binding
Nnmt	1721.75	-0.805987	0.186502	-4.3216	1.54905e-05	0.00145847	nicotinamide N-methyltransferase	ENSMUSG00000032271.13	18113	ENSMUSG00000032271	Nicotinate and nicotinamide metabolism; Metabolic pathways	nicotinamide metabolic process; NAD+ catabolic process; methylation; positive regulation of gluconeogenesis; positive regulation of protein deacetylation	cytoplasm; cytosol	nicotinamide N-methyltransferase activity; methyltransferase activity; S-adenosylmethionine-dependent methyltransferase activity; transferase activity
Cdkn1a	117.304	-0.803445	0.347074	-2.31491	0.0206179	0.161914	cyclin dependent kinase inhibitor 1A	ENSMUSG00000023067.13	12575	ENSMUSG00000023067	Endocrine resistance; Platinum drug resistance; ErbB signaling pathway; HIF-1 signaling pathway; FoxO signaling pathway; Cell cycle; p53 signaling pathway; PI3K-Akt signaling pathway; Cellular senescence; JAK-STAT signaling pathway; Oxytocin signaling pathway; Parathyroid hormone synthesis, secretion and action; Cushing syndrome; Hepatitis C; Hepatitis B; Human cytomegalovirus infection; Human pa…	in utero embryonic development; protein import into nucleus; DNA damage response; mitotic G2 DNA damage checkpoint signaling; Ras protein signal transduction; regulation of mitotic cell cycle; heart development; positive regulation of cell population proliferation; negative regulation of cell population proliferation; epidermis development; response to UV; regulation of G2/M transition of mitotic…	cyclin-dependent protein kinase holoenzyme complex; nucleus; nucleoplasm; nucleolus; cytoplasm; cytosol; nuclear body; protein-containing complex; perinuclear region of cytoplasm; PCNA-p21 complex	protein kinase inhibitor activity; cyclin-dependent protein serine/threonine kinase inhibitor activity; protein binding; zinc ion binding; protein kinase binding; cyclin binding; ubiquitin protein ligase binding; protein-containing complex binding; metal ion binding; protein serine/threonine kinase binding; protein sequestering activity; molecular function activator activity; molecular function i…
Gm35570	41.2383	-0.801973	0.198543	-4.03928	5.36148e-05	0.00342882		ENSMUSG00000104664.1
Gria3	30.554	-0.800486	0.233641	-3.42614	0.000612231	0.0176986	glutamate receptor, ionotropic, AMPA3 (alpha 3)	ENSMUSG00000001986.16	53623	ENSMUSG00000001986	cAMP signaling pathway; Neuroactive ligand-receptor interaction; Neuroactive ligand signaling; Circadian entrainment; Retrograde endocannabinoid signaling; Glutamatergic synapse; Dopaminergic synapse; Long-term depression; Huntington disease; Spinocerebellar ataxia; Pathways of neurodegeneration - multiple diseases; Amphetamine addiction; Nicotine addiction; Transcriptional misregulation in cancer	regulation of receptor recycling; monoatomic ion transport; calcium-mediated signaling; monoatomic ion transmembrane transport; ionotropic glutamate receptor signaling pathway; synaptic transmission, glutamatergic; modulation of chemical synaptic transmission; protein homotetramerization; protein heterotetramerization; regulation of postsynaptic membrane potential; long-term synaptic potentiation…	plasma membrane; postsynaptic density; membrane; dendrite; asymmetric synapse; AMPA glutamate receptor complex; protein-containing complex; presynaptic membrane; neuronal cell body; synaptic cleft; terminal bouton; dendritic spine; dendritic shaft; perikaryon; synapse; postsynaptic membrane; presynaptic active zone membrane; parallel fiber to Purkinje cell synapse; postsynaptic density membrane; …	amyloid-beta binding; glutamate-gated receptor activity; AMPA glutamate receptor activity; monoatomic ion channel activity; protein binding; ligand-gated monoatomic ion channel activity; glutamate-gated calcium ion channel activity; signaling receptor activity; ligand-gated monoatomic ion channel activity involved in regulation of presynaptic membrane potential; transmitter-gated monoatomic ion c…
Lrrn4	18.4039	-0.787861	0.311351	-2.53046	0.0113914	0.113798	leucine rich repeat neuronal 4	ENSMUSG00000043110.2	320974	ENSMUSG00000043110		long-term memory; visual learning	plasma membrane; membrane	molecular_function
Selenbp2	3260.62	-0.771766	0.414983	-1.85975	0.0629204	0.295386	selenium binding protein 2	ENSMUSG00000068877.12	20342	ENSMUSG00000068877	Sulfur metabolism; Metabolic pathways	protein transport	fibrillar center; nucleus; nucleolus; cytoplasm; cytosol; membrane	selenium binding; methanethiol oxidase activity
Chac1	154.423	-0.764377	0.261631	-2.92159	0.00348252	0.0560207	ChaC, cation transport regulator 1	ENSMUSG00000027313.3	69065	ENSMUSG00000027313	Glutathione metabolism; Metabolic pathways	glutathione catabolic process; apoptotic process; response to unfolded protein; Notch signaling pathway; nervous system development; negative regulation of protein processing; neurogenesis; negative regulation of Notch signaling pathway; response to caloric restriction; intrinsic apoptotic signaling pathway in response to endoplasmic reticulum stress	cytoplasm; Golgi apparatus; trans-Golgi network; cytosol	Notch binding; lyase activity; glutathione specific gamma-glutamylcyclotransferase activity
E030018B13Rik	21.1223	-0.753437	0.299929	-2.51205	0.0120031	0.116663	RIKEN cDNA E030018B13 gene	ENSMUSG00000095061.1	381994	ENSMUSG00000095061		biological_process	cellular_component	molecular_function
Cib3	28.8489	-0.752282	0.360909	-2.08441	0.0371228	0.22402	calcium and integrin binding family member 3	ENSMUSG00000074240.3	234421	ENSMUSG00000074240		biological_process; calcium ion homeostasis	cellular_component	magnesium ion binding; molecular_function; calcium ion binding; metal ion binding
Gpx6	95.4097	-0.748394	0.187315	-3.99537	6.45921e-05	0.00387495	glutathione peroxidase 6	ENSMUSG00000004341.7	75512	ENSMUSG00000004341	Glutathione metabolism; Metabolic pathways; Thyroid hormone synthesis; Amyotrophic lateral sclerosis; Huntington disease; Pathways of neurodegeneration - multiple diseases	response to oxidative stress; cellular oxidant detoxification	extracellular region	peroxidase activity; glutathione peroxidase activity; oxidoreductase activity
Lrrc75a	13.4488	-0.746552	0.239654	-3.11512	0.00183868	0.0364457	leucine rich repeat containing 75A	ENSMUSG00000046417.14	192976	ENSMUSG00000046417		biological_process; proteasome-mediated ubiquitin-dependent protein catabolic process	cytoplasm; Cul2-RING ubiquitin ligase complex	molecular_function; ubiquitin-like ligase-substrate adaptor activity
Syt12	33.2287	-0.744086	0.222717	-3.34095	0.000834924	0.0211192	synaptotagmin XII	ENSMUSG00000049303.10	171180	ENSMUSG00000049303		vesicle-mediated transport; regulation of calcium ion-dependent exocytosis; spontaneous exocytosis of neurotransmitter; long-term synaptic potentiation; presynaptic modulation of chemical synaptic transmission	plasma membrane; synaptic vesicle; membrane; synaptic vesicle membrane; cytoplasmic vesicle; synapse; exocytic vesicle; hippocampal mossy fiber to CA3 synapse; presynapse	SNARE binding; calcium-dependent phospholipid binding; calcium ion sensor activity
Tnnt2	14.6732	-0.744007	0.224043	-3.32082	0.000897541	0.0222873	troponin T2, cardiac	ENSMUSG00000026414.13	21956	ENSMUSG00000026414	Cardiac muscle contraction; Adrenergic signaling in cardiomyocytes; Motor proteins; Cytoskeleton in muscle cells; Hypertrophic cardiomyopathy; Dilated cardiomyopathy	muscle contraction; regulation of muscle contraction; heart development; regulation of heart contraction; response to bacterium; muscle filament sliding; negative regulation of ATP-dependent activity; positive regulation of ATP-dependent activity; regulation of muscle filament sliding speed; sarcomere organization; response to calcium ion; actin crosslink formation; atrial cardiac muscle tissue m…	troponin complex; striated muscle thin filament; sarcoplasm; myofibril; sarcomere; cardiac myofibril; cardiac Troponin complex	microfilament motor activity; actin binding; structural constituent of cytoskeleton; tropomyosin binding; troponin C binding; protein-macromolecule adaptor activity; troponin I binding; identical protein binding; protein-containing complex binding
BC021767	24.3912	-0.741142	0.230445	-3.21613	0.0012993	0.0287842	cingulin pseudogene	ENSMUSG00000085006.7	545551	ENSMUSG00000121295
2310034O05Rik	25.8187	-0.732178	0.266295	-2.74951	0.00596853	0.0787939	RIKEN cDNA 2310034O05 gene	ENSMUSG00000100157.6	69571	ENSMUSG00000100157
Cpxm2	14.1088	-0.730417	0.228424	-3.19763	0.0013856	0.0302082	carboxypeptidase X, M14 family member 2	ENSMUSG00000030862.13	55987	ENSMUSG00000030862			extracellular region	zinc ion binding
Clic5	83.3146	-0.73032	0.118686	-6.1534	7.58393e-10	4.67377e-07	chloride intracellular channel 5	ENSMUSG00000023959.8	224796	ENSMUSG00000023959		response to dietary excess; diet induced thermogenesis; monoatomic ion transport; chloride transport; visual perception; sensory perception of sound; intracellular protein localization; epidermal cell differentiation; monoatomic ion transmembrane transport; neuromuscular process controlling balance; auditory receptor cell stereocilium organization; inner ear receptor cell stereocilium organizatio…	cytoplasm; mitochondrion; mitochondrial inner membrane; Golgi apparatus; centrosome; cytoskeleton; plasma membrane; cell cortex; actin cytoskeleton; membrane; apical plasma membrane; stereocilium; stereocilium bundle; monoatomic ion channel complex; chloride channel complex; cell projection; stereocilium base	chloride channel activity; protein binding; oxidoreductase activity
Ikzf4	25.3706	-0.724082	0.228967	-3.16239	0.00156482	0.0327581	IKAROS family zinc finger 4	ENSMUSG00000002578.15	22781	ENSMUSG00000002578		regulation of transcription by RNA polymerase II; negative regulation of DNA-templated transcription; positive regulation of transcription by RNA polymerase II; protein homooligomerization	nucleus; nucleoplasm; nuclear body; protein-containing complex	RNA polymerase II cis-regulatory region sequence-specific DNA binding; DNA binding; DNA-binding transcription factor activity; protein binding; zinc ion binding; protein domain specific binding; identical protein binding; bHLH transcription factor binding; sequence-specific DNA binding; metal ion binding
Pde6c	53.9199	-0.723538	0.214233	-3.37735	0.000731891	0.0195719	phosphodiesterase 6C, cGMP specific, cone, alpha prime	ENSMUSG00000024992.12	110855	ENSMUSG00000024992	Purine metabolism; Metabolic pathways	signal transduction; visual perception; phototransduction, visible light; retinal cone cell development; sensory perception of light stimulus; retina development in camera-type eye; negative regulation of cAMP/PKA signal transduction	plasma membrane; membrane	nucleotide binding; 3',5'-cyclic-nucleotide phosphodiesterase activity; 3',5'-cyclic-AMP phosphodiesterase activity; phosphoric diester hydrolase activity; hydrolase activity; cGMP binding; metal ion binding; 3',5'-cyclic-GMP phosphodiesterase activity
Rgs3	234.075	-0.721854	0.180262	-4.00447	6.21564e-05	0.0038132	regulator of G-protein signaling 3	ENSMUSG00000059810.18	50780	ENSMUSG00000059810	Axon guidance	G protein-coupled receptor signaling pathway; negative regulation of signal transduction	nucleus; cytoplasm; plasma membrane; membrane	GTPase activator activity
Kcnt2	15.7796	-0.71861	0.269717	-2.66431	0.00771453	0.092869	potassium channel, subfamily T, member 2	ENSMUSG00000052726.15	240776	ENSMUSG00000052726		monoatomic ion transport; potassium ion transport; monoatomic ion transmembrane transport; potassium ion transmembrane transport; potassium ion export across plasma membrane	plasma membrane; membrane	intracellular sodium-activated potassium channel activity; potassium channel activity; protein binding; outward rectifier potassium channel activity; chloride-activated potassium channel activity
Mup15	1929.97	-0.714117	0.374733	-1.90567	0.0566929	0.280629	major urinary protein 15	ENSMUSG00000096674.1	100039150	ENSMUSG00000096674		biological_process	extracellular region; extracellular space	molecular_function; odorant binding; pheromone binding; small molecule binding
Cyp2c70	5575.03	-0.713937	0.155244	-4.59881	4.24907e-06	0.000581908	cytochrome P450, family 2, subfamily c, polypeptide 70	ENSMUSG00000060613.10	226105	ENSMUSG00000060613	Steroid hormone biosynthesis; Arachidonic acid metabolism; Linoleic acid metabolism; Retinol metabolism; Metabolic pathways; Serotonergic synapse; Inflammatory mediator regulation of TRP channels; Chemical carcinogenesis - DNA adducts	epoxygenase P450 pathway; xenobiotic catabolic process	cytoplasm; endoplasmic reticulum; endoplasmic reticulum membrane; membrane; intracellular membrane-bounded organelle	monooxygenase activity; iron ion binding; oxidoreductase activity; oxidoreductase activity, acting on paired donors, with incorporation or reduction of molecular oxygen; oxidoreductase activity, acting on paired donors, with incorporation or reduction of molecular oxygen, reduced flavin or flavoprotein as one donor, and incorporation of one atom of oxygen; heme binding; metal ion binding
Cd14	45.2186	-0.713066	0.241836	-2.94855	0.00319268	0.0527882	CD14 antigen	ENSMUSG00000051439.6	12475	ENSMUSG00000051439	MAPK signaling pathway; NF-kappa B signaling pathway; Phagosome; Toll-like receptor signaling pathway; Hematopoietic cell lineage; Alcoholic liver disease; Salmonella infection; Pertussis; Legionellosis; Amoebiasis; Tuberculosis; Transcriptional misregulation in cancer; Acute myeloid leukemia; Lipid and atherosclerosis	positive regulation of cytokine production; response to molecule of bacterial origin; immune system process; cell surface pattern recognition receptor signaling pathway; receptor-mediated endocytosis; inflammatory response; response to bacterium; lipopolysaccharide-mediated signaling pathway; positive regulation of lipopolysaccharide-mediated signaling pathway; response to magnesium ion; positive…	extracellular region; extracellular space; Golgi apparatus; plasma membrane; external side of plasma membrane; cell surface; membrane; membrane raft; lipopolysaccharide receptor complex; side of membrane	lipopolysaccharide binding; lipopolysaccharide immune receptor activity; lipoteichoic acid binding; molecular carrier activity
Lrtm1	281.8	-0.712665	0.286522	-2.4873	0.0128717	0.121423	leucine-rich repeats and transmembrane domains 1	ENSMUSG00000045776.2	319476	ENSMUSG00000045776		positive regulation of synapse assembly	membrane
Mmrn1	12.9823	-0.709085	0.317003	-2.23684	0.0252967	0.182045	multimerin 1	ENSMUSG00000054641.10	70945	ENSMUSG00000054641		negative regulation of vascular endothelial growth factor receptor signaling pathway; cell adhesion mediated by integrin; negative regulation of wound healing; negative regulation of cell migration involved in sprouting angiogenesis; positive regulation of platelet aggregation	extracellular region; extracellular matrix; platelet alpha granule; multimerin complex	extracellular matrix structural constituent; calcium ion binding
Lrrc18	16.1328	-0.695778	0.162729	-4.27568	1.90557e-05	0.00169947	leucine rich repeat containing 18	ENSMUSG00000041673.11	67580	ENSMUSG00000041673			cellular_component; cytoplasm	molecular_function
Myc	369.921	-0.695148	0.352304	-1.97315	0.0484786	0.259908	myelocytomatosis oncogene	ENSMUSG00000022346.14	17869	ENSMUSG00000022346	MAPK signaling pathway; ErbB signaling pathway; Cell cycle; PI3K-Akt signaling pathway; Cellular senescence; Wnt signaling pathway; TGF-beta signaling pathway; Hippo signaling pathway; Signaling pathways regulating pluripotency of stem cells; JAK-STAT signaling pathway; Thyroid hormone signaling pathway; Salmonella infection; Hepatitis C; Hepatitis B; Human cytomegalovirus infection; Human T-cell…	G1/S transition of mitotic cell cycle; negative regulation of transcription by RNA polymerase II; MAPK cascade; re-entry into mitotic cell cycle; branching involved in ureteric bud morphogenesis; B cell apoptotic process; NK T cell proliferation; positive regulation of mesenchymal cell proliferation; regulation of oxidative phosphorylation; positive regulation of B cell apoptotic process; glucose…	chromatin; euchromatin; nucleus; nucleoplasm; chromosome; nucleolus; cytoplasm; spindle; nuclear body; axon; protein-containing complex; perinuclear region of cytoplasm; Myc-Max complex; RNA polymerase II transcription repressor complex	RNA polymerase II cis-regulatory region sequence-specific DNA binding; DNA-binding transcription factor activity, RNA polymerase II-specific; cis-regulatory region sequence-specific DNA binding; core promoter sequence-specific DNA binding; transcription coregulator binding; DNA-binding transcription repressor activity, RNA polymerase II-specific; DNA-binding transcription activator activity, RNA …
Lrg1	11181.7	-0.694634	0.20544	-3.3812	0.000721697	0.0194489	leucine-rich alpha-2-glycoprotein 1	ENSMUSG00000037095.7	76905	ENSMUSG00000037095		positive regulation of endothelial cell proliferation; response to bacterium; positive regulation of epithelial to mesenchymal transition; positive regulation of keratinocyte proliferation; positive regulation of transforming growth factor beta receptor signaling pathway; wound healing, spreading of epidermal cells; positive regulation of angiogenesis; brown fat cell differentiation; keratinocyte…	extracellular space; voltage-gated potassium channel complex	type II transforming growth factor beta receptor binding; transforming growth factor beta receptor binding; voltage-gated potassium channel activity; protein binding; type I transforming growth factor beta receptor binding; transmembrane transporter binding; potassium channel activator activity
Col6a6	15.3887	-0.694454	0.233577	-2.97312	0.00294787	0.0502101	collagen, type VI, alpha 6	ENSMUSG00000043719.14	245026	ENSMUSG00000043719	PI3K-Akt signaling pathway; Focal adhesion; ECM-receptor interaction; Cytoskeleton in muscle cells; Protein digestion and absorption; Human papillomavirus infection	cell adhesion; extracellular matrix organization	extracellular region; collagen trimer; collagen type VI trimer; extracellular matrix	extracellular matrix structural constituent conferring tensile strength
Urad	667.614	-0.691277	0.123394	-5.60221	2.11635e-08	7.17337e-06	ureidoimidazoline (2-oxo-4-hydroxy-4-carboxy-5) decarboxylase	ENSMUSG00000075543.4	231903	ENSMUSG00000075543	Purine metabolism; Metabolic pathways	allantoin metabolic process; purine nucleobase metabolic process; guanine catabolic process; inosine catabolic process; deoxyinosine catabolic process; adenosine catabolic process; deoxyadenosine catabolic process; deoxyguanosine catabolic process; AMP catabolic process; IMP catabolic process; hypoxanthine catabolic process; xanthine catabolic process; urate catabolic process; amide catabolic pro…	peroxisome	lyase activity; carboxy-lyase activity; 2-oxo-4-hydroxy-4-carboxy-5-ureidoimidazoline decarboxylase activity
RP23-306P12.3	46.8499	-0.689697	0.320134	-2.1544	0.0312085	0.205201		ENSMUSG00000108884.1
Blnk	76.5941	-0.687644	0.182324	-3.77154	0.000162241	0.00711865	B cell linker	ENSMUSG00000061132.13	17060	ENSMUSG00000061132	NF-kappa B signaling pathway; Osteoclast differentiation; B cell receptor signaling pathway; Epstein-Barr virus infection; Primary immunodeficiency	cell surface receptor protein tyrosine kinase signaling pathway; positive regulation of gene expression; intracellular signal transduction; B cell activation; B cell receptor signaling pathway	cytoplasm; cytosol; plasma membrane; membrane	protein binding; lipid binding; enzyme binding; protein kinase binding; signaling adaptor activity; SH2 domain binding; phospholipase binding; molecular condensate scaffold activity; protein tyrosine kinase binding
Fam65b	100.122	-0.682875	0.148294	-4.60488	4.12704e-06	0.000570964		ENSMUSG00000036006.19
Fam222a	61.6345	-0.678614	0.219024	-3.09835	0.00194602	0.0378538	family with sequence similarity 222, member A	ENSMUSG00000041930.7	433940	ENSMUSG00000041930		biological_process	cellular_component	molecular_function
Ptk6	27.528	-0.674163	0.189645	-3.55487	0.000378162	0.0124445	PTK6 protein tyrosine kinase 6	ENSMUSG00000038751.5	20459	ENSMUSG00000038751		cell surface receptor protein tyrosine kinase signaling pathway; tyrosine phosphorylation of STAT protein; positive regulation of neuron projection development; cell migration; cell differentiation; negative regulation of growth; protein autophosphorylation; intestinal epithelial cell differentiation; cellular response to retinoic acid	ruffle; nucleus; nucleoplasm; cytoplasm; cytosol; plasma membrane; membrane; nuclear body; cell projection	nucleotide binding; protein kinase activity; protein tyrosine kinase activity; non-membrane spanning protein tyrosine kinase activity; signaling receptor binding; ATP binding; kinase activity; transferase activity; identical protein binding
Arid5a	58.3632	-0.672435	0.140845	-4.7743	1.80329e-06	0.000309482	AT-rich interaction domain 5A	ENSMUSG00000037447.16	214855	ENSMUSG00000037447		negative regulation of transcription by RNA polymerase II; chondrocyte differentiation; immune system process; regulation of transcription by RNA polymerase II; positive regulation of type II interferon production; positive regulation of interleukin-17 production; positive regulation of interleukin-6 production; positive regulation of tumor necrosis factor production; innate immune response; posi…	nucleus; nucleoplasm; transcription regulator complex; nucleolus	transcription cis-regulatory region binding; DNA binding; chromatin binding; transcription corepressor activity; RNA binding; protein binding; nuclear estrogen receptor binding; RNA stem-loop binding; mRNA 3'-UTR AU-rich region binding; identical protein binding; sequence-specific DNA binding; nuclear retinoid X receptor binding; nuclear thyroid hormone receptor binding; nuclear androgen receptor…
H2-Bl	61.8963	-0.669616	0.182788	-3.66334	0.000248951	0.00964365	histocompatibility 2, blastocyst	ENSMUSG00000073406.10	14963	ENSMUSG00000073406	Endocytosis; Phagosome; Cellular senescence; Cell adhesion molecules; Antigen processing and presentation; Type I diabetes mellitus; Human cytomegalovirus infection; Human papillomavirus infection; Human T-cell leukemia virus 1 infection; Kaposi sarcoma-associated herpesvirus infection; Herpes simplex virus 1 infection; Epstein-Barr virus infection; Human immunodeficiency virus 1 infection; Viral…	positive regulation of T cell mediated cytotoxicity; antigen processing and presentation of endogenous peptide antigen via MHC class Ib; antigen processing and presentation of endogenous peptide antigen via MHC class I via ER pathway, TAP-independent; immune response	extracellular space; external side of plasma membrane	signaling receptor binding; peptide antigen binding
Slc10a2	557.64	-0.66256	0.142109	-4.66235	3.12625e-06	0.000470952	solute carrier family 10, member 2	ENSMUSG00000023073.2	20494	ENSMUSG00000023073	Bile secretion	monoatomic ion transport; sodium ion transport; lipid transport; response to bacterium; bile acid and bile salt transport; transmembrane transport	proteasome complex; microvillus; membrane; apical plasma membrane	bile acid:sodium symporter activity; symporter activity
Meg3	51.2792	-0.659208	0.205315	-3.21071	0.00132408	0.0292377	maternally expressed 3	ENSMUSG00000021268.17	17263	ENSMUSG00000021268
Srrm4	161.994	-0.647816	0.144124	-4.49484	6.96217e-06	0.000858119	serine/arginine repetitive matrix 4	ENSMUSG00000063919.10	68955	ENSMUSG00000063919		regulation of alternative mRNA splicing, via spliceosome; mRNA processing; nervous system development; sensory perception of sound; RNA splicing; cell differentiation; neuron maturation; regulation of RNA splicing	nucleus	RNA binding; mRNA binding; identical protein binding
Mup12	623.233	-0.647597	0.324153	-1.99781	0.0457367	0.252483	major urinary protein 12	ENSMUSG00000094793.1	100039054	ENSMUSG00000094793
Tgm1	294.827	-0.645194	0.193466	-3.33491	0.000853263	0.021463	transglutaminase 1, K polypeptide	ENSMUSG00000022218.15	21816	ENSMUSG00000022218	Cornified envelope formation	animal organ morphogenesis; positive regulation of keratinocyte proliferation; keratinocyte differentiation; keratinization; positive regulation of cell cycle; animal organ development	adherens junction; membrane	protein-glutamine gamma-glutamyltransferase activity; transferase activity; acyltransferase activity; identical protein binding; metal ion binding
Ntf3	17.9697	-0.644577	0.210341	-3.06444	0.00218077	0.0411795	neurotrophin 3	ENSMUSG00000049107.13	18205	ENSMUSG00000049107	MAPK signaling pathway; Ras signaling pathway; PI3K-Akt signaling pathway; Neurotrophin signaling pathway	positive regulation of receptor internalization; cell surface receptor protein tyrosine kinase signaling pathway; neuromuscular synaptic transmission; nervous system development; glial cell fate determination; axon guidance; brain development; peripheral nervous system development; positive regulation of cell population proliferation; epidermis development; nerve development; central nervous syst…	extracellular region; extracellular space; endoplasmic reticulum lumen; synaptic vesicle; axon; dendrite; cytoplasmic vesicle	signaling receptor binding; nerve growth factor receptor binding; neurotrophin receptor binding; neurotrophin p75 receptor binding; protein binding; growth factor activity; chemoattractant activity; nerve growth factor binding
Mmp12	26.1002	-0.640622	0.373985	-1.71296	0.0867191	0.348111	matrix metallopeptidase 12	ENSMUSG00000049723.14	17381	ENSMUSG00000049723		negative regulation of transcription by RNA polymerase II; proteolysis; protein import into nucleus; positive regulation of gene expression; extracellular matrix organization; collagen catabolic process; positive regulation of interferon-alpha production; wound healing, spreading of epidermal cells; positive regulation of transcription by RNA polymerase II; lung alveolus development; regulation o…	extracellular region; extracellular space; nucleus; cytoplasm; extracellular matrix	core promoter sequence-specific DNA binding; metalloendopeptidase activity; calcium ion binding; collagen binding; peptidase activity; metallopeptidase activity; zinc ion binding; hydrolase activity; sequence-specific DNA binding; metal ion binding
9030619P08Rik	118.834	-0.636399	0.186223	-3.41741	0.000632199	0.0179317	lymphocyte antigen 6 complex pseudogene	ENSMUSG00000053168.5	105892	ENSMUSG00000121494
Dntt	95.2553	-0.636075	0.181036	-3.51352	0.000442208	0.0140081	deoxynucleotidyltransferase, terminal	ENSMUSG00000025014.12	21673	ENSMUSG00000025014	Non-homologous end-joining; Hematopoietic cell lineage	DNA metabolic process; DNA repair; double-strand break repair via nonhomologous end joining; DNA modification; response to ATP; DNA biosynthetic process	chromatin; euchromatin; nucleus; nucleoplasm; cytoplasm; cytosol; nuclear matrix	DNA binding; DNA-directed DNA polymerase activity; DNA nucleotidylexotransferase activity; transferase activity; nucleotidyltransferase activity; hydrolase activity; DNA polymerase activity; metal ion binding
Gm45044	28.6802	-0.632604	0.212676	-2.97449	0.00293473	0.0501122		ENSMUSG00000108969.1
Cd4	36.3935	-0.631852	0.187964	-3.36156	0.000775033	0.0203181	CD4 antigen	ENSMUSG00000023274.14	12504	ENSMUSG00000023274	Viral life cycle - HIV-1; Virion - Human immunodeficiency virus; Cytokine-cytokine receptor interaction; Cell adhesion molecules; Antigen processing and presentation; Hematopoietic cell lineage; Th1 and Th2 cell differentiation; Th17 cell differentiation; T cell receptor signaling pathway; Yersinia infection; Human T-cell leukemia virus 1 infection; Human immunodeficiency virus 1 infection; PD-L1…	adaptive immune response; immune system process; immune response; cell adhesion; cell surface receptor signaling pathway; positive regulation of calcium ion transport into cytosol; T cell differentiation; macrophage differentiation; maintenance of protein location in cell; helper T cell enhancement of adaptive immune response; interleukin-15-mediated signaling pathway; positive regulation of T ce…	endoplasmic reticulum lumen; endoplasmic reticulum membrane; plasma membrane; external side of plasma membrane; cell surface; membrane; membrane raft	virus receptor activity; signaling receptor binding; protein binding; zinc ion binding; lipid binding; coreceptor activity; immunoglobulin binding; enzyme binding; protein kinase binding; MHC class II protein complex binding; interleukin-16 binding; interleukin-16 receptor activity; MHC class II protein binding; identical protein binding; protein homodimerization activity; protein tyrosine kinase…
Rspo1	23.7044	-0.630881	0.337326	-1.87024	0.06145	0.292124	R-spondin 1	ENSMUSG00000028871.7	192199	ENSMUSG00000028871	Wnt signaling pathway	regulation of receptor internalization; male meiotic nuclear division; regulation of gene expression; Wnt signaling pathway; positive regulation of Wnt signaling pathway; regulation of macromolecule metabolic process; positive regulation of canonical Wnt signaling pathway; negative regulation of eating behavior; positive regulation of non-canonical Wnt signaling pathway; regulation of male germ c…	extracellular region; extracellular space; nucleus	G protein-coupled receptor binding; signaling receptor binding; protein binding; heparin binding
Dusp14	15.0849	-0.627625	0.269359	-2.33007	0.0198024	0.158023	dual specificity phosphatase 14	ENSMUSG00000018648.15	56405	ENSMUSG00000018648			nucleus; cytoplasm	phosphoprotein phosphatase activity; protein serine/threonine phosphatase activity; protein tyrosine phosphatase activity; hydrolase activity; MAP kinase tyrosine/serine/threonine phosphatase activity
Gm15622	65.6255	-0.626963	0.284873	-2.20085	0.0277463	0.191705	predicted gene 15622	ENSMUSG00000085834.1	100379608	ENSMUSG00000085834
Mup17	4006.88	-0.621839	0.362086	-1.71738	0.0859101	0.347526	major urinary protein 17	ENSMUSG00000096688.1	100039206	ENSMUSG00000096688		biological_process	extracellular region; extracellular space	molecular_function; odorant binding; pheromone binding; small molecule binding
Nfe2	20.0494	-0.619887	0.239033	-2.59331	0.00950577	0.103434	nuclear factor, erythroid derived 2	ENSMUSG00000058794.12	18022	ENSMUSG00000058794		regulation of DNA-templated transcription; regulation of transcription by RNA polymerase II; cell-cell signaling; negative regulation of cell population proliferation; gene expression; regulation of gene expression; negative regulation of bone mineralization; negative regulation of syncytium formation by plasma membrane fusion; labyrinthine layer blood vessel development	nucleus; nucleoplasm; cytoplasm; PML body; protein-DNA complex; RNA polymerase II transcription regulator complex	RNA polymerase II cis-regulatory region sequence-specific DNA binding; DNA-binding transcription factor activity, RNA polymerase II-specific; DNA binding; DNA-binding transcription factor activity; protein binding; identical protein binding; WW domain binding; sequence-specific double-stranded DNA binding
Cav1	164.307	-0.61832	0.184894	-3.34419	0.000825219	0.0209912	caveolin 1, caveolae protein	ENSMUSG00000007655.16	12389	ENSMUSG00000007655	Endocytosis; Focal adhesion; Prion disease; Bacterial invasion of epithelial cells; Proteoglycans in cancer; Viral myocarditis; Fluid shear stress and atherosclerosis	negative regulation of transcription by RNA polymerase II; angiogenesis; vasculogenesis; response to hypoxia; negative regulation of endothelial cell proliferation; positive regulation of endothelial cell proliferation; negative regulation of cytokine-mediated signaling pathway; regulation of the force of heart contraction; glandular epithelial cell differentiation; response to ischemia; regulati…	Golgi membrane; acrosomal membrane; caveolar macromolecular signaling complex; endosome; peroxisomal membrane; endoplasmic reticulum; Golgi apparatus; lipid droplet; plasma membrane; caveola; focal adhesion; cilium; cell cortex; basal plasma membrane; cell surface; membrane; basolateral plasma membrane; apical plasma membrane; cytoplasmic vesicle; protein-containing complex; membrane raft; perinu…	SNARE binding; signaling receptor binding; protein binding; oxysterol binding; peptidase activator activity; enzyme binding; kinase binding; protein kinase binding; syntaxin binding; protein tyrosine kinase inhibitor activity; protein-macromolecule adaptor activity; small GTPase binding; receptor serine/threonine kinase binding; nitric-oxide synthase inhibitor activity; identical protein binding;…
Gm7628	20.3022	-0.617927	0.148432	-4.16303	3.14048e-05	0.00240557	predicted gene 7628	ENSMUSG00000025644.10	115487215	ENSMUSG00000025644		biological_process	cellular_component	molecular_function
Hsd3b5	3678.89	-0.614884	0.426378	-1.44211	0.149272	0.45923	hydroxy-delta-5-steroid dehydrogenase, 3 beta- and steroid delta-isomerase 5	ENSMUSG00000038092.6	15496	ENSMUSG00000038092	Steroid hormone biosynthesis; Metabolic pathways; Ovarian steroidogenesis; Aldosterone synthesis and secretion; Cortisol synthesis and secretion; Cushing syndrome	lipid metabolic process; steroid biosynthetic process; steroid metabolic process; C21-steroid hormone metabolic process; response to stilbenoid	nucleolus; cytoplasm; mitochondrion; mitochondrial inner membrane; mitochondrial intermembrane space; endoplasmic reticulum; endoplasmic reticulum membrane; cilium; microtubule cytoskeleton; membrane; mitochondrial membrane; intracellular membrane-bounded organelle; intercellular bridge	3-beta-hydroxysteroid 3-dehydrogenase (NADP+) activity; 3-beta-hydroxy-Delta5-steroid dehydrogenase (NAD+) activity; steroid Delta-isomerase activity; steroid binding; oxidoreductase activity; oxidoreductase activity, acting on the CH-OH group of donors, NAD or NADP as acceptor; 5-alpha-androstane-3-beta,17-beta-diol dehydrogenase (NADP+) activity
Lepr	142.157	-0.612286	0.159555	-3.83747	0.000124311	0.0059137	leptin receptor	ENSMUSG00000057722.17	16847	ENSMUSG00000057722	Cytokine-cytokine receptor interaction; Neuroactive ligand-receptor interaction; Hormone signaling; AMPK signaling pathway; JAK-STAT signaling pathway; Adipocytokine signaling pathway; Non-alcoholic fatty liver disease	angiogenesis; glycogen metabolic process; phagocytosis; signal transduction; cholesterol metabolic process; positive regulation of cell population proliferation; negative regulation of autophagy; glial cell proliferation; cytokine-mediated signaling pathway; sexual reproduction; T cell differentiation; leptin-mediated signaling pathway; positive regulation of insulin secretion involved in cellula…	extracellular region; extracellular space; plasma membrane; external side of plasma membrane; membrane; basolateral plasma membrane; receptor complex	transmembrane signaling receptor activity; cytokine receptor activity; protein binding; protein-hormone receptor activity; peptide hormone binding; cytokine binding; leptin receptor activity; signaling receptor activity; identical protein binding
Gm5093	19.5269	-0.611585	0.174247	-3.50988	0.000448315	0.0141684	ribosomal protein L11 pseudogene	ENSMUSG00000091742.1	328825	ENSMUSG00000091742
Jazf1	16.4135	-0.610505	0.179844	-3.39463	0.00068721	0.0189374	JAZF zinc finger 1	ENSMUSG00000063568.11	231986	ENSMUSG00000063568		negative regulation of transcription by RNA polymerase II; lipid metabolic process	fibrillar center; nucleus; nucleoplasm; cytosol; transcription repressor complex	transcription corepressor activity; zinc ion binding; metal ion binding
Igfbp6	51.9981	-0.610231	0.304517	-2.00393	0.0450773	0.25103	insulin-like growth factor binding protein 6	ENSMUSG00000023046.6	16012	ENSMUSG00000023046		cell migration; positive regulation of stress-activated MAPK cascade; positive regulation of MAPK cascade; regulation of insulin-like growth factor receptor signaling pathway	extracellular region; extracellular space; extracellular matrix; insulin-like growth factor binary complex	fibronectin binding; extracellular matrix structural constituent; insulin-like growth factor binding; growth factor binding; insulin-like growth factor I binding; insulin-like growth factor II binding; identical protein binding
Ces3b	12585.3	-0.6069	0.163779	-3.70561	0.000210883	0.00856032	carboxylesterase 3B	ENSMUSG00000062181.14	13909	ENSMUSG00000062181			endoplasmic reticulum; endoplasmic reticulum lumen	hydrolase activity; carboxylic ester hydrolase activity; carboxylesterase activity
Mup11	4840.77	-0.60499	0.349073	-1.73313	0.0830722	0.341508	major urinary protein 11	ENSMUSG00000073834.10	100039028	ENSMUSG00000073834		energy reserve metabolic process; mitochondrion organization; biological_process; insulin receptor signaling pathway; aerobic respiration; positive regulation of gene expression; negative regulation of lipid storage; positive regulation of glucose metabolic process; heat generation; glucose homeostasis; locomotor rhythm; negative regulation of gluconeogenesis; positive regulation of lipid metabol…	cellular_component; extracellular region; extracellular space; nucleus; cytosol	molecular_function; insulin receptor activity; odorant binding; pheromone binding; small molecule binding
Atp11a	261.693	-0.604767	0.139571	-4.33304	1.47062e-05	0.0014142	ATPase, class VI, type 11A	ENSMUSG00000031441.15	50770	ENSMUSG00000031441	Efferocytosis	in utero embryonic development; lipid transport; positive regulation of myotube differentiation; phospholipid transport; phospholipid translocation; regulation of membrane lipid distribution	endosome; early endosome; endoplasmic reticulum; endoplasmic reticulum membrane; Golgi apparatus; plasma membrane; membrane; recycling endosome; phospholipid-translocating ATPase complex	nucleotide binding; magnesium ion binding; ATP binding; ATP hydrolysis activity; metal ion binding; phosphatidylethanolamine flippase activity; phosphatidylserine floppase activity; ATPase-coupled intramembrane lipid transporter activity; phosphatidylserine flippase activity
C7	36.4983	-0.590279	0.250003	-2.36108	0.0182216	0.150364	complement component 7	ENSMUSG00000079105.3	109828	ENSMUSG00000079105	Complement and coagulation cascades; Regulation of actin cytoskeleton; Prion disease; Coronavirus disease - COVID-19; Systemic lupus erythematosus	immune system process; immune response; complement activation; complement activation, classical pathway; killing of cells of another organism; innate immune response; positive regulation of immune response; complement activation, GZMK pathway	extracellular region; membrane attack complex; extracellular space; plasma membrane; membrane; other organism cell membrane; transmembrane transporter complex
Ptch2	40.4876	-0.590215	0.187228	-3.15239	0.00161939	0.0335202	patched 2	ENSMUSG00000028681.11	19207	ENSMUSG00000028681	Hedgehog signaling pathway; Pathways in cancer; Basal cell carcinoma	regulation of cell growth; cell fate determination; epidermis development; epidermal cell fate specification; hair cycle; skin development; positive regulation of epidermal cell differentiation; negative regulation of smoothened signaling pathway	plasma membrane; membrane	smoothened binding; hedgehog receptor activity; hedgehog family protein binding
Tmem108	14.9257	-0.583686	0.176846	-3.30053	0.000965011	0.0232854	transmembrane protein 108	ENSMUSG00000042757.15	81907	ENSMUSG00000042757		receptor-mediated endocytosis; retrograde axonal transport; dentate gyrus development; neuron projection development; positive regulation of neurotrophin TRK receptor signaling pathway; postsynaptic density organization; dendrite extension; regulation of neurotransmitter receptor localization to postsynaptic specialization membrane; modulation of excitatory postsynaptic potential; cellular respon…	endosome; early endosome; endosome membrane; postsynaptic density; membrane; axon; dendrite; somatodendritic compartment; cell projection; synapse; postsynaptic density membrane; glutamatergic synapse; axon cytoplasm	protein binding
Acaa1b	45784.1	0.360617	0.122923	2.93368	0.0033497	0.0543245	acetyl-Coenzyme A acyltransferase 1B	ENSMUSG00000010651.4	235674	ENSMUSG00000010651	Fatty acid degradation; Valine, leucine and isoleucine degradation; alpha-Linolenic acid metabolism; Biosynthesis of unsaturated fatty acids; Metabolic pathways; Fatty acid metabolism; PPAR signaling pathway; Peroxisome	very long-chain fatty acid metabolic process; lipid metabolic process; fatty acid metabolic process; fatty acid beta-oxidation; unsaturated fatty acid biosynthetic process; bile acid metabolic process; phenylacetate catabolic process; fatty acid beta-oxidation using acyl-CoA oxidase; alpha-linolenic acid metabolic process; long-chain fatty acid biosynthetic process; fatty acid derivative biosynth…	mitochondrion; peroxisome; peroxisomal matrix	acetyl-CoA C-acetyltransferase activity; acetyl-CoA C-acyltransferase activity; acetate CoA-transferase activity; transferase activity; acyltransferase activity; acyltransferase activity, transferring groups other than amino-acyl groups; acetyl-CoA C-myristoyltransferase activity
Cx3cr1	25.9853	-0.573513	0.228972	-2.50473	0.0122545	0.117834	C-X3-C motif chemokine receptor 1	ENSMUSG00000052336.6	13051	ENSMUSG00000052336	Cytokine-cytokine receptor interaction; Viral protein interaction with cytokine and cytokine receptor; Chemokine signaling pathway; Efferocytosis	microglial cell activation; positive regulation of neuroblast proliferation; adaptive immune response; microglial cell activation involved in immune response; immune system process; negative regulation of chronic inflammatory response to non-antigenic stimulus; response to ischemia; chemotaxis; inflammatory response; immune response; cell adhesion; signal transduction; G protein-coupled receptor …	plasma membrane; external side of plasma membrane; cell surface; membrane; neuronal cell body membrane; perinuclear region of cytoplasm; dendritic tree	cytokine receptor activity; G protein-coupled receptor activity; chemokine receptor activity; C-C chemokine receptor activity; C-X3-C chemokine receptor activity; C-C chemokine binding; C-X3-C chemokine binding; CX3C chemokine receptor binding
Rnase4	23633.9	-0.569992	0.0993398	-5.7378	9.59143e-09	3.42212e-06	ribonuclease, RNase A family 4	ENSMUSG00000021876.14	58809	ENSMUSG00000021876		cellular response to starvation; antibacterial humoral response; defense response to bacterium; defense response to Gram-positive bacterium	extracellular region; extracellular space	nucleic acid binding; nuclease activity; endonuclease activity; RNA nuclease activity; hydrolase activity
Ang	4477.47	-0.56777	0.120925	-4.69522	2.66319e-06	0.000415029	angiogenin, ribonuclease, RNase A family, 5	ENSMUSG00000072115.10	11727	ENSMUSG00000072115	Amyotrophic lateral sclerosis	angiogenesis; response to hypoxia; response to yeast; positive regulation of endothelial cell proliferation; cytoplasmic translation; receptor-mediated endocytosis; signal transduction; central nervous system development; rRNA transcription; response to hormone; cell migration; negative regulation of translation; antibacterial humoral response; antifungal humoral response; signaling; actin filame…	extracellular region; basement membrane; extracellular space; nucleus; chromosome; nucleolus; cytoplasm; cytoplasmic stress granule; actin cytoskeleton; endocytic vesicle; growth cone; angiogenin-PRI complex; neuronal cell body	nucleic acid binding; DNA binding; RNA binding; actin binding; nuclease activity; endonuclease activity; RNA nuclease activity; tRNA-specific ribonuclease activity; signaling receptor binding; copper ion binding; heparin binding; hydrolase activity; peptide binding; protein homodimerization activity; ribosome binding; receptor ligand activity
Mup20	67962.6	-0.567422	0.20077	-2.82623	0.00470997	0.0678616	major urinary protein 20	ENSMUSG00000078672.2	381530	ENSMUSG00000078672		signal transduction; olfactory learning; positive regulation of neurogenesis; vocalization behavior; positive regulation of neural precursor cell proliferation	extracellular region; extracellular space	mating pheromone activity; pheromone activity; odorant binding; pheromone binding; small molecule binding
Cenpm	39.7827	-0.566448	0.214679	-2.63858	0.00832544	0.0971397	centromere protein M	ENSMUSG00000068101.10	66570	ENSMUSG00000068101		chromosome segregation; biological_process	chromosome, centromeric region; kinetochore; inner kinetochore; nucleus; chromosome; cytoplasm	molecular_function
Gna14	150.575	-0.562105	0.155365	-3.61797	0.000296922	0.0106782	guanine nucleotide binding protein, alpha 14	ENSMUSG00000024697.3	14675	ENSMUSG00000024697	Calcium signaling pathway; Hormone signaling; Chagas disease; Amoebiasis	action potential; inflammatory response; signal transduction; G protein-coupled receptor signaling pathway; adenylate cyclase-modulating G protein-coupled receptor signaling pathway; phospholipase C-activating G protein-coupled acetylcholine receptor signaling pathway; regulation of blood pressure; positive regulation of insulin secretion; regulation of melanocyte differentiation; developmental p…	cytoplasm; heterotrimeric G-protein complex; plasma membrane; synapse	nucleotide binding; G protein-coupled receptor binding; GTPase activity; GTP binding; guanyl nucleotide binding; G-protein beta/gamma-subunit complex binding; metal ion binding
Cyp2s1	24.5439	-0.558996	0.228755	-2.44364	0.0145398	0.13142	cytochrome P450, family 2, subfamily s, polypeptide 1	ENSMUSG00000040703.11	74134	ENSMUSG00000040703	Retinol metabolism; Metabolism of xenobiotics by cytochrome P450; Metabolic pathways	lipid metabolic process; fatty acid metabolic process; icosanoid metabolic process; prostaglandin metabolic process; xenobiotic metabolic process; epoxygenase P450 pathway; retinoic acid metabolic process	cytoplasm; endoplasmic reticulum; endoplasmic reticulum membrane; membrane; intracellular membrane-bounded organelle	monooxygenase activity; thromboxane-A synthase activity; iron ion binding; arachidonate epoxygenase activity; oxidoreductase activity; oxidoreductase activity, acting on paired donors, with incorporation or reduction of molecular oxygen; oxidoreductase activity, acting on paired donors, with incorporation or reduction of molecular oxygen, reduced flavin or flavoprotein as one donor, and incorpora…
Srrm4os	19.4527	-0.555339	0.177433	-3.12984	0.001749	0.0353924	serine/arginine repetitive matrix 4, opposite strand	ENSMUSG00000086219.7	76798	ENSMUSG00000086219
Mtmr11	36.376	-0.55511	0.213861	-2.59566	0.0094409	0.102976	myotubularin related protein 11	ENSMUSG00000045934.15	194126	ENSMUSG00000045934			cytoplasm; membrane
Plxnb1	2057.28	-0.554637	0.078831	-7.03577	1.9816e-12	3.35832e-09	plexin B1	ENSMUSG00000053646.13	235611	ENSMUSG00000053646	Axon guidance	negative regulation of cell adhesion; synapse assembly; regulation of cell shape; regulation of cell migration; negative regulation of osteoblast proliferation; positive regulation of Rho protein signal transduction; positive regulation of GTPase activity; ossification involved in bone maturation; neuron projection morphogenesis; positive regulation of axonogenesis; regulation of cytoskeleton org…	semaphorin receptor complex; plasma membrane; membrane; postsynaptic membrane; glutamatergic synapse	protein binding; semaphorin receptor activity; GTPase activating protein binding
Tacc2	811.74	-0.553023	0.179572	-3.07967	0.00207228	0.039546	transforming, acidic coiled-coil containing protein 2	ENSMUSG00000030852.16	57752	ENSMUSG00000030852		microtubule cytoskeleton organization; mitotic spindle organization; nuclear migration; cell population proliferation; cerebral cortex development; neurogenesis; interkinetic nuclear migration; astral microtubule organization; regulation of microtubule-based process	nucleus; nucleoplasm; cytoplasm; centrosome; cytosol; cytoskeleton; plasma membrane	nuclear receptor binding; protein domain specific binding
Arid5b	782.83	-0.552656	0.185133	-2.98519	0.00283406	0.0486999	AT-rich interaction domain 5B	ENSMUSG00000019947.9	71371	ENSMUSG00000019947		negative regulation of transcription by RNA polymerase II; kidney development; regulation of transcription by RNA polymerase II; male gonad development; female gonad development; post-embryonic development; fibroblast migration; adrenal gland development; multicellular organism growth; fat cell differentiation; positive regulation of DNA-templated transcription; platelet-derived growth factor rec…	nucleus	transcription cis-regulatory region binding; DNA binding; transcription coactivator activity
RP24-140P18.1	9.35444	-0.55241	0.197678	-2.79449	0.00519816	0.0722097		ENSMUSG00000110341.1
Ddit4	214.24	-0.551107	0.248664	-2.21627	0.026673	0.186997	DNA-damage-inducible transcript 4	ENSMUSG00000020108.3	74747	ENSMUSG00000020108	Autophagy - animal; mTOR signaling pathway; PI3K-Akt signaling pathway; MicroRNAs in cancer	response to hypoxia; neuron migration; apoptotic process; brain development; negative regulation of signal transduction; neuron differentiation; negative regulation of TOR signaling; protein-containing complex disassembly; intracellular signal transduction; intrinsic apoptotic signaling pathway in response to DNA damage by p53 class mediator; negative regulation of glycolytic process; neurotrophi…	cytoplasm; mitochondrion; cytosol	14-3-3 protein binding
Ugt2b38	104.617	-0.549459	0.333453	-1.64779	0.0993961	0.374166	UDP glucuronosyltransferase 2 family, polypeptide B38	ENSMUSG00000061906.5	100559	ENSMUSG00000061906	Pentose and glucuronate interconversions; Ascorbate and aldarate metabolism; Steroid hormone biosynthesis; Retinol metabolism; Porphyrin metabolism; Metabolism of xenobiotics by cytochrome P450; Drug metabolism - cytochrome P450; Drug metabolism - other enzymes; Metabolic pathways; Biosynthesis of cofactors; Bile secretion; Chemical carcinogenesis - DNA adducts; Chemical carcinogenesis - receptor…		nuclear outer membrane; endoplasmic reticulum; membrane	UDP-glycosyltransferase activity; glucuronosyltransferase activity; transferase activity; glycosyltransferase activity
C5ar1	18.5365	-0.549245	0.208079	-2.6396	0.00830051	0.0971397	complement component 5a receptor 1	ENSMUSG00000049130.6	12273	ENSMUSG00000049130	Neuroactive ligand-receptor interaction; Complement and coagulation cascades; Neutrophil extracellular trap formation; Alcoholic liver disease; Staphylococcus aureus infection; Coronavirus disease - COVID-19	microglial cell activation; complement receptor mediated signaling pathway; positive regulation of immune system process; chemotaxis; inflammatory response; signal transduction; G protein-coupled receptor signaling pathway; adenylate cyclase-inhibiting G protein-coupled receptor signaling pathway; phospholipase C-activating G protein-coupled receptor signaling pathway; positive regulation of cyto…	plasma membrane; cell surface; membrane; basolateral plasma membrane; cytoplasmic vesicle; apical part of cell	complement component C5a binding; complement receptor activity; complement component C5a receptor activity; G protein-coupled receptor activity
A530083I20Rik	12.7207	-0.544163	0.171001	-3.18221	0.00146155	0.0314036	RIKEN cDNA A530083I20 gene	ENSMUSG00000097322.7	331045	ENSMUSG00000097322
Fndc3b	397.331	-0.54078	0.167044	-3.23736	0.00120642	0.0272679	fibronectin type III domain containing 3B	ENSMUSG00000039286.12	72007	ENSMUSG00000039286		fibroblast migration; substrate adhesion-dependent cell spreading; positive regulation of fat cell differentiation; negative regulation of osteoblast differentiation; positive regulation of fibroblast proliferation; type II pneumocyte differentiation	cytoplasm; endoplasmic reticulum; endomembrane system; membrane
Agap2	91.0048	-0.539417	0.155498	-3.46896	0.000522481	0.0158634	ArfGAP with GTPase domain, ankyrin repeat and PH domain 2	ENSMUSG00000025422.8	216439	ENSMUSG00000025422	FoxO signaling pathway; Endocytosis	endosomal transport; actin cytoskeleton organization; positive regulation of mammary gland epithelial cell proliferation; negative regulation of protein catabolic process; negative regulation of apoptotic process; negative regulation of neuron apoptotic process; positive regulation of transcription by RNA polymerase II; positive regulation of receptor signaling pathway via JAK-STAT; phosphatidyli…	nucleus; nucleoplasm; cytoplasm; endosome; cytosol; external side of plasma membrane; membrane; dendrite; Flemming body; postsynapse; glutamatergic synapse	nucleotide binding; GTPase activity; GTPase activator activity; protein binding; ATP binding; GTP binding; zinc ion binding; protein kinase binding; protein kinase activator activity; phosphatidylinositol 3-kinase regulator activity; ionotropic glutamate receptor binding; protein-containing complex binding; metal ion binding
Cd63	127.495	-0.539153	0.182823	-2.94904	0.00318758	0.0527683	CD63 antigen	ENSMUSG00000025351.13	12512	ENSMUSG00000025351	Virion - Hepatitis viruses; Lysosome; Proteoglycans in cancer	positive regulation of receptor internalization; cell-matrix adhesion; intracellular protein localization; negative regulation of epithelial cell migration; protein transport; cell migration; cell differentiation; epithelial cell differentiation; endosome to melanosome transport; pigmentation; positive regulation of cell adhesion; positive regulation of endocytosis; pigment granule maturation; pi…	extracellular region; extracellular space; nucleoplasm; lysosome; lysosomal membrane; endosome; late endosome; multivesicular body; plasma membrane; cell surface; endosome membrane; membrane; late endosome membrane; endosome lumen; vesicle; multivesicular body membrane; protein-containing complex; melanosome; extracellular exosome; multivesicular body, internal vesicle	protein binding; protein-containing complex binding
Igfbp5	674.856	-0.538546	0.255767	-2.10562	0.0352378	0.217457	insulin-like growth factor binding protein 5	ENSMUSG00000026185.8	16011	ENSMUSG00000026185		regulation of cell growth; osteoblast differentiation; female pregnancy; cell population proliferation; negative regulation of smooth muscle cell migration; negative regulation of translation; negative regulation of cell migration; hair follicle morphogenesis; intracellular signal transduction; regulation of growth; glucose homeostasis; regulation of insulin-like growth factor receptor signaling …	extracellular region; extracellular space; nucleus; cytoplasm; insulin-like growth factor binding protein complex; insulin-like growth factor ternary complex	fibronectin binding; insulin-like growth factor binding; growth factor binding; insulin-like growth factor I binding; insulin-like growth factor II binding; receptor ligand activity
Got1	4666.92	-0.537873	0.112986	-4.76052	1.93098e-06	0.000319471	glutamic-oxaloacetic transaminase 1, soluble	ENSMUSG00000025190.13	14718	ENSMUSG00000025190	Arginine biosynthesis; Alanine, aspartate and glutamate metabolism; Cysteine and methionine metabolism; Arginine and proline metabolism; Tyrosine metabolism; Phenylalanine metabolism; Phenylalanine, tyrosine and tryptophan biosynthesis; Metabolic pathways; Carbon metabolism; 2-Oxocarboxylic acid metabolism; Biosynthesis of amino acids	gluconeogenesis; 2-oxoglutarate metabolic process; oxaloacetate metabolic process; glycerol biosynthetic process; amino acid metabolic process; aspartate metabolic process; aspartate biosynthetic process; L-aspartate catabolic process; glutamate metabolic process; Notch signaling pathway; amino acid biosynthetic process; response to carbohydrate; L-glutamate catabolic process to aspartate; positi…	cytoplasm; cytosol; axon terminus	catalytic activity; L-aspartate:2-oxoglutarate aminotransferase activity; phosphatidylserine decarboxylase activity; transaminase activity; transferase activity; pyridoxal phosphate binding; carboxylic acid binding; L-cysteine transaminase activity; 2-aminobutanoate transaminase activity
Pgpep1l	11.8663	-0.536271	0.192422	-2.78695	0.0053207	0.0730251	pyroglutamyl-peptidase I-like	ENSMUSG00000030553.3	78444	ENSMUSG00000030553		proteolysis		molecular_function; peptidase activity; cysteine-type peptidase activity; hydrolase activity
Mt2	1006.74	-0.534462	0.32349	-1.65217	0.0984992	0.3722	metallothionein 2	ENSMUSG00000031762.6	17750	ENSMUSG00000031762	Mineral absorption	intracellular zinc ion homeostasis; nitric oxide mediated signal transduction; response to bacterium; detoxification of copper ion; intracellular monoatomic cation homeostasis; negative regulation of growth; cellular response to cadmium ion; cellular response to copper ion; cellular response to zinc ion	nucleus; cytoplasm; cytosol	zinc ion binding; cadmium ion binding; metal ion binding
Gm11963	62.0158	-0.532412	0.131477	-4.04946	5.13357e-05	0.0033462	predicted gene 11963	ENSMUSG00000085189.1	102639290	ENSMUSG00000120142		biological_process	cellular_component	molecular_function
Fam83f	82.1437	-0.53212	0.206647	-2.57503	0.0100233	0.106518	family with sequence similarity 83, member F	ENSMUSG00000022408.6	213956	ENSMUSG00000022408		signal transduction	cellular_component; plasma membrane; membrane	protein kinase binding
Foxq1	599.801	-0.524849	0.363646	-1.4433	0.148937	0.458774	forkhead box Q1	ENSMUSG00000038415.9	15220	ENSMUSG00000038415		negative regulation of transcription by RNA polymerase II; morphogenesis of an epithelium; regulation of DNA-templated transcription; regulation of transcription by RNA polymerase II; anatomical structure morphogenesis; cell differentiation; hair follicle morphogenesis; negative regulation of DNA-templated transcription	nucleus	RNA polymerase II cis-regulatory region sequence-specific DNA binding; DNA-binding transcription factor activity, RNA polymerase II-specific; DNA-binding transcription repressor activity, RNA polymerase II-specific; DNA binding; DNA-binding transcription factor activity; sequence-specific DNA binding; sequence-specific double-stranded DNA binding
Kcnn4	12.7457	-0.519672	0.164235	-3.16419	0.00155516	0.0327142	potassium intermediate/small conductance calcium-activated channel, subfamily N, member 4	ENSMUSG00000054342.8	16534	ENSMUSG00000054342	Insulin secretion; GnRH secretion; Salivary secretion; Protein digestion and absorption	regulation of angiotensin levels in blood; immune system process; cardiac muscle hypertrophy; monoatomic ion transport; potassium ion transport; calcium ion transport; monoatomic anion transport; cell volume homeostasis; negative regulation of cardiac muscle hypertrophy; stabilization of membrane potential; regulation of tumor necrosis factor production; monoatomic ion transmembrane transport; ma…	cytosol; plasma membrane; membrane; basolateral plasma membrane; apical plasma membrane; vesicle; ruffle membrane; cell projection; neuron projection; neuronal cell body	inward rectifier potassium channel activity; potassium channel activity; calmodulin binding; calcium-activated potassium channel activity; small conductance calcium-activated potassium channel activity; protein phosphatase binding; intermediate conductance calcium-activated potassium channel activity; protein homodimerization activity
Sspn	58.9317	-0.515256	0.117128	-4.3991	1.087e-05	0.00116044	sarcospan	ENSMUSG00000030255.13	16651	ENSMUSG00000030255	Cytoskeleton in muscle cells; Hypertrophic cardiomyopathy; Arrhythmogenic right ventricular cardiomyopathy; Dilated cardiomyopathy; Viral myocarditis		plasma membrane; dystrophin-associated glycoprotein complex; membrane; transport vesicle; sarcolemma; synapse; postsynaptic membrane	protein-containing complex binding
Phlda1	2091.54	-0.512946	0.282262	-1.81727	0.0691754	0.310507	pleckstrin homology like domain, family A, member 1	ENSMUSG00000020205.8	21664	ENSMUSG00000020205		apoptotic process; glycoprotein biosynthetic process; positive regulation of apoptotic process	nucleus; nucleoplasm; nucleolus; cytoplasm; cytoplasmic vesicle	protein binding; phosphatidylinositol phosphate binding
Slc13a3	666.037	-0.512843	0.13773	-3.72355	0.000196443	0.00816988	solute carrier family 13 (sodium-dependent dicarboxylate transporter), member 3	ENSMUSG00000018459.15	114644	ENSMUSG00000018459		monoatomic ion transport; sodium ion transport; dicarboxylic acid transport; alpha-ketoglutarate transport; succinate transport; citrate transport; aspartate transmembrane transport; glutathione transmembrane transport; sodium ion transmembrane transport; carboxylic acid transport; transmembrane transport; succinate transmembrane transport	plasma membrane; membrane; basolateral plasma membrane	dicarboxylic acid transmembrane transporter activity; organic acid:sodium symporter activity; citrate transmembrane transporter activity; alpha-ketoglutarate transmembrane transporter activity; succinate transmembrane transporter activity; L-aspartate transmembrane transporter activity; symporter activity; high-affinity sodium:dicarboxylate symporter activity; solute:sodium symporter activity; so…
Prkg2	15.1141	-0.51166	0.20084	-2.5476	0.0108466	0.111309	protein kinase, cGMP-dependent, type II	ENSMUSG00000029334.14	19092	ENSMUSG00000029334	cGMP-PKG signaling pathway; Hormone signaling; Gap junction; Platelet activation; Circadian entrainment; Thermogenesis; Long-term depression; Olfactory transduction; Regulation of lipolysis in adipocytes; Renin secretion; Salivary secretion	signal transduction; circadian rhythm; positive regulation of chondrocyte differentiation; circadian regulation of gene expression; negative regulation of cell volume; positive regulation of small molecule metabolic process; cellular hypotonic response; protein localization to plasma membrane; positive regulation of protein localization; negative regulation of chloride transport	plasma membrane; membrane; apical plasma membrane; nuclear membrane	nucleotide binding; protein kinase activity; protein serine/threonine kinase activity; cGMP-dependent protein kinase activity; protein binding; ATP binding; kinase activity; transferase activity; cGMP binding; identical protein binding; mitogen-activated protein kinase binding; protein serine kinase activity
Mogat2	17.1436	-0.510953	0.257999	-1.98044	0.0476539	0.257433	monoacylglycerol O-acyltransferase 2	ENSMUSG00000052396.7	233549	ENSMUSG00000052396	Glycerolipid metabolism; Metabolic pathways; Fat digestion and absorption	glycerol metabolic process; lipid metabolic process; monoacylglycerol biosynthetic process; diacylglycerol biosynthetic process; triglyceride biosynthetic process; monoacylglycerol metabolic process; intestinal absorption	cytoplasm; endoplasmic reticulum; endoplasmic reticulum membrane; membrane; perinuclear region of cytoplasm; perinuclear endoplasmic reticulum membrane	2-acylglycerol O-acyltransferase activity; diacylglycerol O-acyltransferase activity; O-acyltransferase activity; acetyltransferase activity; transferase activity; acyltransferase activity
Camk2b	652.133	-0.510936	0.147747	-3.45819	0.00054382	0.0162678	calcium/calmodulin-dependent protein kinase II, beta	ENSMUSG00000057897.14	12323	ENSMUSG00000057897	ErbB signaling pathway; Calcium signaling pathway; cAMP signaling pathway; HIF-1 signaling pathway; Oocyte meiosis; Efferocytosis; Necroptosis; Adrenergic signaling in cardiomyocytes; Wnt signaling pathway; Axon guidance; Circadian entrainment; Long-term potentiation; Neurotrophin signaling pathway; Cholinergic synapse; Dopaminergic synapse; Olfactory transduction; Inflammatory mediator regulatio…	G1/S transition of mitotic cell cycle; calcium ion transport; nervous system development; positive regulation of neuron projection development; cell differentiation; regulation of synaptic transmission, cholinergic; response to cadmium ion; regulation of neuronal synaptic plasticity; regulation of long-term neuronal synaptic plasticity; cell projection morphogenesis; neuromuscular process control…	cytoplasm; centrosome; cytosol; cytoskeleton; calcium- and calmodulin-dependent protein kinase complex; postsynaptic density; membrane; sarcoplasmic reticulum; dendrite; sarcoplasmic reticulum membrane; neuron projection; perikaryon; organelle; synapse; spindle midzone; glutamatergic synapse	nucleotide binding; protein kinase activity; protein serine/threonine kinase activity; calcium/calmodulin-dependent protein kinase activity; protein binding; calmodulin binding; ATP binding; kinase activity; transferase activity; protein kinase binding; identical protein binding; protein homodimerization activity; phospholipase binding; structural constituent of postsynaptic actin cytoskeleton; p…
Flywch2	13.261	-0.510126	0.162307	-3.14297	0.00167244	0.0342522	FLYWCH family member 2	ENSMUSG00000023911.12	76917	ENSMUSG00000023911		biological_process	cellular_component	molecular_function
Ntrk2	74.5195	-0.508909	0.299441	-1.69953	0.0892197	0.353077	neurotrophic tyrosine kinase, receptor, type 2	ENSMUSG00000055254.14	18212	ENSMUSG00000055254	MAPK signaling pathway; Ras signaling pathway; Calcium signaling pathway; PI3K-Akt signaling pathway; Neurotrophin signaling pathway; Alcoholism	vasculogenesis; neuron migration; cell surface receptor protein tyrosine kinase signaling pathway; nervous system development; neuromuscular junction development; learning or memory; learning; long-term memory; circadian rhythm; feeding behavior; positive regulation of cell population proliferation; positive regulation of gene expression; regulation of neuron projection development; positive regu…	cytoplasm; endosome; early endosome; cytosol; plasma membrane; cell surface; endosome membrane; postsynaptic density; membrane; axon; dendrite; growth cone; neuromuscular junction; early endosome membrane; cell projection; neuronal cell body; terminal bouton; dendritic spine; perikaryon; receptor complex; axon terminus; synapse; postsynaptic membrane; perinuclear region of cytoplasm; presynaptic …	nucleotide binding; protease binding; protein kinase activity; protein tyrosine kinase activity; transmembrane receptor protein tyrosine kinase activity; neurotrophin receptor activity; protein binding; ATP binding; kinase activity; transferase activity; receptor tyrosine kinase binding; protein homodimerization activity; neurotrophin binding; brain-derived neurotrophic factor binding; brain-deri…
Runx3	12.3349	-0.508505	0.219567	-2.31595	0.020561	0.161697	runt related transcription factor 3	ENSMUSG00000070691.10	12399	ENSMUSG00000070691	Th1 and Th2 cell differentiation; Epstein-Barr virus infection	negative regulation of transcription by RNA polymerase II; ossification; chondrocyte differentiation; regulation of DNA-templated transcription; regulation of transcription by RNA polymerase II; protein phosphorylation; axon guidance; hemopoiesis; neuron differentiation; hair follicle morphogenesis; neuron projection development; negative regulation of CD4-positive, alpha-beta T cell differentiat…	chromatin; nucleus; nucleoplasm; transcription regulator complex; nucleolus; cytoplasm; cytosol; core-binding factor complex	RNA polymerase II transcription regulatory region sequence-specific DNA binding; RNA polymerase II cis-regulatory region sequence-specific DNA binding; DNA-binding transcription factor activity, RNA polymerase II-specific; transcription corepressor binding; DNA binding; DNA-binding transcription factor activity; protein binding; ATP binding; histone deacetylase binding; SMAD binding; sequence-spe…
Wsb1	525.33	-0.506645	0.135804	-3.73071	0.000190937	0.00802871	WD repeat and SOCS box-containing 1	ENSMUSG00000017677.11	78889	ENSMUSG00000017677		protein polyubiquitination; protein ubiquitination; intracellular signal transduction; protein K27-linked ubiquitination; protein aggregate center assembly	cytoplasm	protein binding; ubiquitin protein ligase activity
Mup14	3408.14	-0.505118	0.363722	-1.38875	0.16491	0.482487	major urinary protein 14	ENSMUSG00000073830.11	100039116	ENSMUSG00000073830		biological_process	extracellular region; extracellular space	molecular_function; odorant binding; pheromone binding; small molecule binding
Saa2	657.308	-0.504544	0.26703	-1.88946	0.05883	0.285934	serum amyloid A 2	ENSMUSG00000057465.5	20209	ENSMUSG00000057465		acute-phase response; response to stilbenoid	extracellular region; cytoplasmic microtubule; high-density lipoprotein particle	G protein-coupled receptor binding; protein binding
Ypel4	13.4948	-0.504301	0.187685	-2.68696	0.00721064	0.0887131	yippee like 4	ENSMUSG00000034059.13	241525	ENSMUSG00000034059		regulation of cell shape; negative regulation of erythrocyte clearance; negative regulation of erythrocyte differentiation; protein localization to plasma membrane	cellular_component; nucleus; nucleolus	protein binding; metal ion binding
Cdh3	17.2181	-0.503927	0.218004	-2.31155	0.0208027	0.162843	cadherin 3	ENSMUSG00000061048.7	12560	ENSMUSG00000061048	Cell adhesion molecules	cell morphogenesis; retina homeostasis; cell-cell junction assembly; cell adhesion; homophilic cell adhesion via plasma membrane adhesion molecules; positive regulation of gene expression; positive regulation of keratinocyte proliferation; calcium-dependent cell-cell adhesion via plasma membrane cell adhesion molecules; cell migration; hair cycle process; negative regulation of transforming growt…	cytoplasm; plasma membrane; adherens junction; membrane; catenin complex; cell junction	calcium ion binding; beta-catenin binding; cadherin binding; metal ion binding
Slc22a7	997.087	-0.503669	0.19295	-2.61036	0.0090448	0.100681	solute carrier family 22 (organic anion transporter), member 7	ENSMUSG00000067144.6	108114	ENSMUSG00000067144	Bile secretion	monoatomic ion transport; organic anion transport; prostaglandin transport; alpha-ketoglutarate transport; response to stilbenoid; transmembrane transport	plasma membrane; basal plasma membrane; membrane; basolateral plasma membrane; apical plasma membrane	organic anion transmembrane transporter activity; prostaglandin transmembrane transporter activity; alpha-ketoglutarate transmembrane transporter activity; sodium-independent organic anion transmembrane transporter activity; transmembrane transporter activity
Krt7	31.3449	-0.50322	0.164085	-3.06683	0.00216342	0.040966	keratin 7	ENSMUSG00000023039.16	110310	ENSMUSG00000023039	Cornified envelope formation	keratinization; intermediate filament organization	cytoplasm; cytosol; intermediate filament; keratin filament; intermediate filament cytoskeleton	protein binding; structural constituent of skin epidermis
Il1r1	1385.87	-0.501378	0.221141	-2.26723	0.0233762	0.173758	interleukin 1 receptor, type I	ENSMUSG00000026072.12	16177	ENSMUSG00000026072	MAPK signaling pathway; Cytokine-cytokine receptor interaction; NF-kappa B signaling pathway; Osteoclast differentiation; Hematopoietic cell lineage; Th17 cell differentiation; Inflammatory mediator regulation of TRP channels; Amoebiasis; Human cytomegalovirus infection; Human T-cell leukemia virus 1 infection; Fluid shear stress and atherosclerosis	inflammatory response; signal transduction; heat acclimation; positive regulation of platelet-derived growth factor receptor signaling pathway; cytokine-mediated signaling pathway; positive regulation of cell migration; positive regulation of type II interferon production; positive regulation of canonical NF-kappaB signal transduction; regulation of inflammatory response; positive regulation of p…	extracellular region; extracellular space; plasma membrane; external side of plasma membrane; cell surface; membrane; axon; protein-containing complex	protease binding; interleukin-1 receptor activity; interleukin-1, type I, activating receptor activity; platelet-derived growth factor receptor binding; protein binding; hydrolase activity; interleukin-1 binding; ionotropic glutamate receptor binding; NAD+ nucleosidase activity, cyclic ADP-ribose generating
Slc41a3	111.178	-0.500882	0.155725	-3.21645	0.00129788	0.0287842	solute carrier family 41, member 3	ENSMUSG00000030089.15	71699	ENSMUSG00000030089		monoatomic ion transport; monoatomic cation transport; magnesium ion transport; sodium ion transmembrane transport; mitochondrial magnesium ion transmembrane transport	mitochondrion; mitochondrial inner membrane; plasma membrane; membrane	monoatomic cation transmembrane transporter activity; magnesium:sodium antiporter activity
Slc38a11	20.3974	-0.499725	0.198499	-2.51751	0.0118186	0.115797	solute carrier family 38, member 11	ENSMUSG00000061171.15	320106	ENSMUSG00000061171		amino acid transmembrane transport; monoatomic ion transport; sodium ion transport; amino acid transport; L-alpha-amino acid transmembrane transport	membrane	L-amino acid transmembrane transporter activity
Krt19	30.0738	-0.498864	0.181269	-2.75206	0.0059221	0.0783335	keratin 19	ENSMUSG00000020911.14	16669	ENSMUSG00000020911	Cornified envelope formation; Estrogen signaling pathway; Staphylococcus aureus infection	morphogenesis of an epithelium; Notch signaling pathway; epithelial cell differentiation; response to estrogen; intermediate filament organization; sarcomere organization; cell differentiation involved in embryonic placenta development	cytoskeleton; intermediate filament; plasma membrane; dystrophin-associated glycoprotein complex; apicolateral plasma membrane; Z disc; sarcolemma; costamere; keratin filament; cell periphery; terminal web	structural molecule activity; protein binding; structural constituent of muscle; structural constituent of skin epidermis; protein-containing complex binding
Chrne	9.87373	-0.498471	0.274014	-1.81914	0.0688895	0.309691	cholinergic receptor, nicotinic, epsilon polypeptide	ENSMUSG00000014609.16	11448	ENSMUSG00000014609	Neuroactive ligand-receptor interaction	skeletal muscle contraction; monoatomic ion transport; monoatomic cation transport; chemical synaptic transmission; synaptic transmission, cholinergic; monoatomic ion transmembrane transport; regulation of membrane potential; membrane depolarization; regulation of postsynaptic membrane potential; excitatory postsynaptic potential; acetylcholine receptor signaling pathway	plasma membrane; acetylcholine-gated channel complex; membrane; neuromuscular junction; neuron projection; synapse; postsynaptic membrane; postsynaptic specialization membrane	transmembrane signaling receptor activity; monoatomic ion channel activity; extracellular ligand-gated monoatomic ion channel activity; excitatory extracellular ligand-gated monoatomic ion channel activity; acetylcholine receptor activity; acetylcholine-gated monoatomic cation-selective channel activity; transmitter-gated monoatomic ion channel activity involved in regulation of postsynaptic memb…
Pdzk1ip1	100.731	-0.494343	0.187521	-2.6362	0.00838399	0.097237	PDZK1 interacting protein 1	ENSMUSG00000028716.15	67182	ENSMUSG00000028716		biological_process	plasma membrane; membrane; apical plasma membrane	molecular_function
Cxcl14	42.1834	-0.494278	0.221683	-2.22966	0.02577	0.183503	C-X-C motif chemokine ligand 14	ENSMUSG00000021508.10	57266	ENSMUSG00000021508	Cytokine-cytokine receptor interaction; Viral protein interaction with cytokine and cytokine receptor; Chemokine signaling pathway	immune response; signal transduction; killing of cells of another organism; negative regulation of myoblast differentiation; inner ear development; cell chemotaxis; antimicrobial humoral immune response mediated by antimicrobial peptide; positive regulation of natural killer cell chemotaxis	extracellular region; extracellular space; Golgi apparatus	cytokine activity; chemokine activity
Mr1	205.155	-0.493907	0.146095	-3.38071	0.000722985	0.0194489	major histocompatibility complex, class I-related	ENSMUSG00000026471.14	15064	ENSMUSG00000026471		immune system process; antigen processing and presentation of peptide antigen via MHC class I; positive regulation of T cell mediated cytotoxicity directed against tumor cell target; immune response; antigen processing and presentation of exogenous antigen; T cell differentiation in thymus; innate immune response; defense response to Gram-negative bacterium; defense response to Gram-positive bact…	Golgi membrane; extracellular space; endosome; endoplasmic reticulum; endoplasmic reticulum membrane; Golgi apparatus; plasma membrane; external side of plasma membrane; membrane; early endosome membrane; late endosome membrane; MHC class I protein complex	beta-2-microglobulin binding; T cell receptor binding
Saa1	1339.7	-0.493703	0.227388	-2.17119	0.0299167	0.200996	serum amyloid A 1	ENSMUSG00000074115.5	20208	ENSMUSG00000074115		acute-phase response; cholesterol metabolic process; response to bacterium	extracellular region; extracellular space; cytoplasmic microtubule; high-density lipoprotein particle	G protein-coupled receptor binding; protein binding; heparin binding
H2-Q1	335.689	-0.493437	0.238199	-2.07153	0.0383091	0.229089	histocompatibility 2, Q region locus 1	ENSMUSG00000079507.10	15006	ENSMUSG00000079507	Endocytosis; Phagosome; Cellular senescence; Cell adhesion molecules; Antigen processing and presentation; Type I diabetes mellitus; Human cytomegalovirus infection; Human papillomavirus infection; Human T-cell leukemia virus 1 infection; Kaposi sarcoma-associated herpesvirus infection; Herpes simplex virus 1 infection; Epstein-Barr virus infection; Human immunodeficiency virus 1 infection; Viral…	positive regulation of T cell mediated cytotoxicity; immune system process; antigen processing and presentation of peptide antigen via MHC class I; antigen processing and presentation of endogenous peptide antigen via MHC class Ib; antigen processing and presentation of endogenous peptide antigen via MHC class I via ER pathway, TAP-independent; immune response; antigen processing and presentation	Golgi membrane; extracellular space; lysosomal membrane; early endosome; endoplasmic reticulum; Golgi apparatus; Golgi medial cisterna; plasma membrane; external side of plasma membrane; cell surface; membrane; phagocytic vesicle membrane; early endosome membrane; MHC class Ib protein complex; cis-Golgi network membrane; MHC class I protein complex; MHC class I peptide loading complex; endoplasmi…	signaling receptor binding; beta-2-microglobulin binding; peptide binding; MHC class I protein binding; peptide antigen binding; T cell receptor binding; CD8 receptor binding; identical protein binding; protein homodimerization activity; protein-containing complex binding; natural killer cell lectin-like receptor binding; TAP binding; TAP1 binding; TAP2 binding; receptor ligand activity; protein-…
RP23-290O4.2	31.4214	-0.49273	0.146635	-3.36026	0.0007787	0.0203422		ENSMUSG00000109877.1
Hamp2	780.393	-0.492518	0.314611	-1.56548	0.11747	0.409386	hepcidin antimicrobial peptide 2	ENSMUSG00000056978.7	66438	ENSMUSG00000056978	Hormone signaling; TGF-beta signaling pathway	positive regulation of receptor internalization; intracellular iron ion homeostasis; signal transduction; response to iron ion; killing of cells of another organism; positive regulation of proteasomal ubiquitin-dependent protein catabolic process; negative regulation of iron ion transmembrane transport; defense response to bacterium; defense response to Gram-negative bacterium; defense response t…	extracellular region; extracellular space; intercalated disc; apical cortex	signaling receptor binding; hormone activity; iron ion transmembrane transporter inhibitor activity; transporter regulator activity
Colgalt2	21.9566	-0.489286	0.180603	-2.70917	0.0067451	0.0849119	collagen beta(1-O)galactosyltransferase 2	ENSMUSG00000032649.14	269132	ENSMUSG00000032649	Lysine degradation; Other types of O-glycan biosynthesis; Metabolic pathways		cellular_component; endoplasmic reticulum; endoplasmic reticulum lumen	transferase activity; glycosyltransferase activity; procollagen galactosyltransferase activity
Upk3b	84.7742	-0.485277	0.287496	-1.68794	0.0914226	0.356795	uroplakin 3B	ENSMUSG00000042985.7	100647	ENSMUSG00000042985		negative regulation of gene expression; negative regulation of D-glucose import	plasma membrane; membrane
Enho	196.414	-0.48428	0.291053	-1.66389	0.0961345	0.366636	energy homeostasis associated	ENSMUSG00000028445.7	69638	ENSMUSG00000028445		G protein-coupled receptor signaling pathway; positive regulation of Notch signaling pathway; energy homeostasis	extracellular region; extracellular space; plasma membrane	hormone activity; protein binding
Eif4e3	220.608	-0.481256	0.13479	-3.57041	0.000356425	0.0120509	eukaryotic translation initiation factor 4E member 3	ENSMUSG00000093661.1	66892	ENSMUSG00000093661		translation; translational initiation; regulation of translation	eukaryotic translation initiation factor 4F complex	RNA 7-methylguanosine cap binding; RNA binding; translation initiation factor activity
Adamtsl5	38.8003	-0.480242	0.114993	-4.17626	2.9634e-05	0.00228283	ADAMTS-like 5	ENSMUSG00000043822.18	66548	ENSMUSG00000043822		extracellular matrix organization	microfibril; extracellular region; extracellular matrix	heparin binding; microfibril binding
Atp6v0d2	85.4015	-0.479693	0.181436	-2.64387	0.00819633	0.0966312	ATPase, H+ transporting, lysosomal V0 subunit D2	ENSMUSG00000028238.6	242341	ENSMUSG00000028238	Oxidative phosphorylation; Metabolic pathways; Lysosome; Phagosome; Synaptic vesicle cycle; Collecting duct acid secretion; Tuberculosis; Human papillomavirus infection; Viral carcinogenesis; Rheumatoid arthritis	monoatomic ion transport; vacuolar transport; vacuolar acidification; proton transmembrane transport	endosome; early endosome; membrane; apical plasma membrane; vacuolar proton-transporting V-type ATPase complex; proton-transporting V-type ATPase, V0 domain; plasma membrane proton-transporting V-type ATPase complex	proton-transporting ATPase activity, rotational mechanism
Il33	46.4921	-0.477365	0.110106	-4.33551	1.45422e-05	0.0014142	interleukin 33	ENSMUSG00000024810.16	77125	ENSMUSG00000024810	Cytokine-cytokine receptor interaction; Necroptosis; Cytosolic DNA-sensing pathway; Influenza A	negative regulation of transcription by RNA polymerase II; positive regulation of cytokine production; macrophage activation involved in immune response; microglial cell activation involved in immune response; negative regulation of immunoglobulin production; positive regulation of immunoglobulin production; negative regulation of leukocyte migration; negative regulation of T-helper 1 type immune…	extracellular region; extracellular space; nucleus; nucleoplasm; chromosome; cytoplasm; transport vesicle; cytoplasmic vesicle	interleukin-33 receptor binding; cytokine activity; protein binding
Igfbp2	11573.6	-0.476872	0.233115	-2.04565	0.0407906	0.237783	insulin-like growth factor binding protein 2	ENSMUSG00000039323.18	16008	ENSMUSG00000039323		osteoblast differentiation; female pregnancy; response to nutrient; response to xenobiotic stimulus; response to mechanical stimulus; response to estradiol; response to retinoic acid; cellular response to hormone stimulus; positive regulation of activated T cell proliferation; regulation of insulin-like growth factor receptor signaling pathway; response to estrogen; negative regulation of osteobl…	extracellular region; extracellular space; apical plasma membrane	protein phosphatase inhibitor activity; insulin-like growth factor binding; growth factor binding; signaling receptor inhibitor activity; insulin-like growth factor I binding; insulin-like growth factor II binding; receptor ligand inhibitor activity
Ccdc69	12.6214	-0.475141	0.240221	-1.97793	0.0479367	0.25843	coiled-coil domain containing 69	ENSMUSG00000049588.13	52570	ENSMUSG00000049588		spindle midzone assembly	nucleus; cytoplasm; spindle; cytoskeleton; midbody; spindle midzone	microtubule binding
Gm15638	163.167	-0.473102	0.156889	-3.01553	0.0025653	0.0456739	predicted gene 15638	ENSMUSG00000085826.1	100503378	ENSMUSG00000085826
B930025P03Rik	127.729	-0.472835	0.232847	-2.03067	0.0422886	0.241826	RIKEN cDNA B930025P03 gene	ENSMUSG00000109473.1	320014	ENSMUSG00000109291
Gpx3	176.335	-0.468059	0.150555	-3.1089	0.00187786	0.0369758	glutathione peroxidase 3	ENSMUSG00000018339.11	14778	ENSMUSG00000018339	Glutathione metabolism; Metabolic pathways; Thyroid hormone synthesis; Amyotrophic lateral sclerosis; Huntington disease; Pathways of neurodegeneration - multiple diseases	response to oxidative stress; hydrogen peroxide catabolic process; cellular oxidant detoxification	extracellular region; extracellular space	peroxidase activity; glutathione peroxidase activity; selenium binding; oxidoreductase activity; identical protein binding; mercury ion binding
Adrbk2	167.202	-0.4672	0.160866	-2.90427	0.00368111	0.0583043		ENSMUSG00000042249.11
Cyp2c54	9268.19	-0.461465	0.150969	-3.05669	0.00223798	0.0415083	cytochrome P450, family 2, subfamily c, polypeptide 54	ENSMUSG00000067225.1	404195	ENSMUSG00000067225	Steroid hormone biosynthesis; Arachidonic acid metabolism; Linoleic acid metabolism; Retinol metabolism; Metabolic pathways; Serotonergic synapse; Inflammatory mediator regulation of TRP channels; Chemical carcinogenesis - DNA adducts	lipid hydroxylation; organic acid metabolic process; xenobiotic metabolic process; steroid metabolic process; estrogen metabolic process; arachidonate metabolic process; epoxygenase P450 pathway; xenobiotic catabolic process; retinoic acid metabolic process; linoleic acid metabolic process; icosanoid biosynthetic process; oxidative demethylation	cytoplasm; endoplasmic reticulum; endoplasmic reticulum membrane; plasma membrane; membrane; intracellular membrane-bounded organelle	monooxygenase activity; iron ion binding; arachidonate monooxygenase activity; arachidonate epoxygenase activity; retinoic acid 4-hydroxylase activity; oxidoreductase activity; oxidoreductase activity, acting on paired donors, with incorporation or reduction of molecular oxygen; oxidoreductase activity, acting on paired donors, with incorporation or reduction of molecular oxygen, reduced flavin o…
Acvr2b	53.2097	-0.460431	0.12757	-3.60923	0.000307104	0.0108596	activin receptor IIB	ENSMUSG00000061393.13	11481	ENSMUSG00000061393	Cytokine-cytokine receptor interaction; TGF-beta signaling pathway; Signaling pathways regulating pluripotency of stem cells; Fluid shear stress and atherosclerosis	negative regulation of transcription by RNA polymerase II; skeletal system development; gastrulation with mouth forming second; kidney development; lymphangiogenesis; blood vessel remodeling; regulation of DNA-templated transcription; intracellular iron ion homeostasis; cell communication; signal transduction; cell surface receptor protein serine/threonine kinase signaling pathway; determination …	cytoplasm; plasma membrane; membrane; protein-containing complex; receptor complex; activin receptor complex	nucleotide binding; protein kinase activity; protein serine/threonine kinase activity; transmembrane receptor protein serine/threonine kinase activity; protein serine/threonine/tyrosine kinase activity; protein binding; ATP binding; kinase activity; activin receptor activity, type II; transferase activity; activin receptor activity; kinase activator activity; growth factor binding; inhibin bindin…
Cyp2c37	9018.41	-0.45997	0.127181	-3.61666	0.000298435	0.0106902	cytochrome P450, family 2. subfamily c, polypeptide 37	ENSMUSG00000042248.4	13096	ENSMUSG00000042248	Steroid hormone biosynthesis; Arachidonic acid metabolism; Linoleic acid metabolism; Retinol metabolism; Metabolic pathways; Serotonergic synapse; Inflammatory mediator regulation of TRP channels; Chemical carcinogenesis - DNA adducts	lipid metabolic process; arachidonate metabolic process; epoxygenase P450 pathway; xenobiotic catabolic process	cytoplasm; endoplasmic reticulum; endoplasmic reticulum membrane; plasma membrane; membrane; intracellular membrane-bounded organelle	monooxygenase activity; iron ion binding; arachidonate monooxygenase activity; arachidonate epoxygenase activity; steroid hydroxylase activity; retinoic acid 4-hydroxylase activity; oxidoreductase activity; oxidoreductase activity, acting on paired donors, with incorporation or reduction of molecular oxygen; oxidoreductase activity, acting on paired donors, with incorporation or reduction of mole…
Trpm4	65.1078	-0.459896	0.123288	-3.73027	0.000191272	0.00802871	transient receptor potential cation channel, subfamily M, member 4	ENSMUSG00000038260.10	68667	ENSMUSG00000038260	Insulin secretion	adaptive immune response; immune system process; dendritic cell chemotaxis; regulation of T cell cytokine production; monoatomic ion transport; calcium ion transport; positive regulation of cytosolic calcium ion concentration; long-term memory; positive regulation of cell population proliferation; positive regulation of heart rate; protein sumoylation; calcium-mediated signaling; metal ion transp…	nucleoplasm; endoplasmic reticulum; Golgi apparatus; plasma membrane; membrane; sodium channel complex; neuronal cell body	nucleotide binding; monoatomic ion channel activity; calcium-activated cation channel activity; voltage-gated monoatomic ion channel activity; monoatomic cation channel activity; calcium channel activity; calcium ion binding; calmodulin binding; ATP binding; identical protein binding; metal ion binding
Fbln1	43.7724	-0.458466	0.215974	-2.12278	0.033772	0.21359	fibulin 1	ENSMUSG00000006369.14	14114	ENSMUSG00000006369	Cytoskeleton in muscle cells	negative regulation of cell adhesion; embryo implantation; positive regulation of gene expression; extracellular matrix organization; positive regulation of fibroblast proliferation; negative regulation of ERK1 and ERK2 cascade; negative regulation of transforming growth factor beta production; blood coagulation, fibrin clot formation; negative regulation of substrate adhesion-dependent cell spre…	extracellular region; basement membrane; extracellular space; extracellular matrix; elastic fiber	fibronectin binding; integrin binding; extracellular matrix structural constituent; calcium ion binding; protein binding; peptidase activator activity; identical protein binding; protein-containing complex binding; fibrinogen binding
Lcn2	198.162	-0.457808	0.246262	-1.85903	0.063023	0.295561	lipocalin 2	ENSMUSG00000026822.14	16819	ENSMUSG00000026822	IL-17 signaling pathway	immune system process; monoatomic ion transport; iron ion transport; apoptotic process; acute-phase response; response to oxidative stress; short-term memory; long-term memory; response to xenobiotic stimulus; response to virus; response to bacterium; response to herbicide; response to toxic substance; response to blue light; response to fructose; response to iron(II) ion; response to mycotoxin; …	extracellular region; extracellular space; cytosol; cytoplasmic vesicle; cytoplasmic vesicle lumen	protease binding; iron ion binding; protein binding; small molecule binding; identical protein binding; iron ion sequestering activity; enterobactin binding
Gm3839	68.1849	-0.457584	0.297933	-1.53586	0.124573	0.421396		ENSMUSG00000097148.2
Fn1	51934.8	-0.453495	0.102751	-4.41353	1.01699e-05	0.00109569	fibronectin 1	ENSMUSG00000026193.15	14268	ENSMUSG00000026193	PI3K-Akt signaling pathway; Focal adhesion; ECM-receptor interaction; Regulation of actin cytoskeleton; Cytoskeleton in muscle cells; AGE-RAGE signaling pathway in diabetic complications; Bacterial invasion of epithelial cells; Yersinia infection; Amoebiasis; Human papillomavirus infection; Pathways in cancer; Proteoglycans in cancer; Small cell lung cancer	angiogenesis; acute-phase response; cell-substrate junction assembly; cell adhesion; cell-matrix adhesion; calcium-independent cell-matrix adhesion; integrin-mediated signaling pathway; nervous system development; heart development; positive regulation of cell population proliferation; glial cell migration; regulation of cell shape; negative regulation of autophagy; positive regulation of gene ex…	extracellular region; fibrinogen complex; basement membrane; extracellular space; endoplasmic reticulum-Golgi intermediate compartment; apical plasma membrane; extracellular matrix; extracellular exosome	protease binding; signaling receptor binding; integrin binding; extracellular matrix structural constituent; protein binding; heparin binding; peptidase activator activity; identical protein binding; proteoglycan binding; mercury ion binding; receptor ligand activity
Lonrf3	26.4088	-0.453474	0.214644	-2.11268	0.0346278	0.215869	LON peptidase N-terminal domain and ring finger 3	ENSMUSG00000016239.11	74365	ENSMUSG00000016239			cytoplasm	zinc ion binding; metal ion binding
Serpina9	19.5246	-0.453163	0.329985	-1.37328	0.169665	0.489125	serine (or cysteine) peptidase inhibitor, clade A (alpha-1 antiproteinase, antitrypsin), member 9	ENSMUSG00000058260.2	71907	ENSMUSG00000058260			extracellular region; extracellular space	serine-type endopeptidase inhibitor activity; peptidase inhibitor activity
Fgfr1	226.738	-0.450282	0.0832949	-5.40588	6.44892e-08	1.86031e-05	fibroblast growth factor receptor 1	ENSMUSG00000031565.18	14182	ENSMUSG00000031565	MAPK signaling pathway; Ras signaling pathway; Rap1 signaling pathway; Calcium signaling pathway; PI3K-Akt signaling pathway; IgSF CAM signaling; Adherens junction; Signaling pathways regulating pluripotency of stem cells; Thermogenesis; Regulation of actin cytoskeleton; Parathyroid hormone synthesis, secretion and action; Pathways in cancer; Proteoglycans in cancer; Prostate cancer; Melanoma; Br…	negative regulation of transcription by RNA polymerase II; angiogenesis; ureteric bud development; in utero embryonic development; organ induction; epithelial to mesenchymal transition; positive regulation of mesenchymal cell proliferation; chondrocyte differentiation; regulation of mitotic cell cycle; neuroblast proliferation; brain development; salivary gland morphogenesis; sensory perception o…	nucleus; cytoplasm; cytosol; plasma membrane; membrane; cytoplasmic vesicle; receptor complex; perinuclear region of cytoplasm; postsynapse; glutamatergic synapse	nucleotide binding; protein kinase activity; protein tyrosine kinase activity; transmembrane receptor protein tyrosine kinase activity; fibroblast growth factor receptor activity; signaling receptor binding; protein binding; ATP binding; heparin binding; kinase activity; transferase activity; fibroblast growth factor binding; SH2 domain binding; identical protein binding; protein homodimerization…
Spock2	47.5524	-0.450266	0.279761	-1.60947	0.107514	0.390587	sparc/osteonectin, cwcv and kazal-like domains proteoglycan 2	ENSMUSG00000058297.16	94214	ENSMUSG00000058297		positive regulation of cell-substrate adhesion; extracellular matrix organization; cellular response to leukemia inhibitory factor	extracellular region; extracellular space; extracellular matrix	calcium ion binding; collagen binding; glycosaminoglycan binding; extracellular matrix structural constituent conferring compression resistance; extracellular matrix binding
Atg16l2	407.947	-0.450081	0.104649	-4.30086	1.70138e-05	0.00157995	autophagy related 16 like 2	ENSMUSG00000047767.17	73683	ENSMUSG00000047767	Autophagy - animal	autophagosome assembly; protein transport; macroautophagy; negative stranded viral RNA replication	nucleoplasm; cytoplasm; cytosol; phagophore assembly site membrane; Atg12-Atg5-Atg16 complex	protein binding
Hist1h2be	13.6098	-0.448515	0.185135	-2.42264	0.0154082	0.136694		ENSMUSG00000047246.6
Serpina3c	42.7104	-0.446911	0.260101	-1.71822	0.0857559	0.347352	serine (or cysteine) peptidase inhibitor, clade A, member 3C	ENSMUSG00000066361.3	16625	ENSMUSG00000066361		response to cytokine; response to peptide hormone	extracellular region; extracellular space	serine-type endopeptidase inhibitor activity; peptidase inhibitor activity
Nbl1	34.2426	-0.446855	0.260654	-1.71436	0.0864618	0.347962	NBL1, DAN family BMP antagonist	ENSMUSG00000041120.6	17965	ENSMUSG00000041120	TGF-beta signaling pathway	signal transduction; nervous system development; negative regulation of BMP signaling pathway; sequestering of extracellular ligand from receptor; sequestering of BMP in extracellular matrix; sequestering of BMP from receptor via BMP binding; positive regulation of neuron differentiation; determination of dorsal identity; neuron projection morphogenesis; negative regulation of monocyte chemotaxis	extracellular region; extracellular space	protein binding; morphogen activity; BMP binding; identical protein binding; receptor ligand activity
Ocstamp	20.3525	-0.44682	0.20321	-2.19881	0.0278916	0.192316	osteoclast stimulatory transmembrane protein	ENSMUSG00000027670.4	74614	ENSMUSG00000027670		cell differentiation; positive regulation of macrophage fusion; positive regulation of osteoclast differentiation; cellular response to tumor necrosis factor; cellular response to estrogen stimulus; multinuclear osteoclast differentiation; positive regulation of osteoclast proliferation	cellular_component; membrane	molecular_function
Cd207	39.1735	-0.443859	0.227491	-1.95111	0.0510444	0.266837	CD207 antigen	ENSMUSG00000034783.7	246278	ENSMUSG00000034783		immune response; defense response to virus	plasma membrane; external side of plasma membrane; membrane	carbohydrate binding; pattern recognition receptor activity
Sulf1	55.0775	-0.443533	0.28191	-1.57332	0.115646	0.406351	sulfatase 1	ENSMUSG00000016918.15	240725	ENSMUSG00000016918		cartilage condensation; kidney development; negative regulation of endothelial cell proliferation; chondrocyte development; glomerular filtration; sulfur compound metabolic process; apoptotic process; cell adhesion; positive regulation of vascular endothelial growth factor production; esophagus smooth muscle contraction; negative regulation of angiogenesis; positive regulation of Wnt signaling pa…	extracellular region; extracellular space; endoplasmic reticulum; Golgi apparatus; Golgi stack; plasma membrane; cell surface; membrane raft	arylsulfatase activity; calcium ion binding; glycosaminoglycan binding; N-acetylglucosamine-6-sulfatase activity; sulfuric ester hydrolase activity; hydrolase activity; metal ion binding
4930516B21Rik	75.0557	-0.442938	0.138195	-3.20518	0.0013498	0.0296126		ENSMUSG00000097504.1		ENSMUSG00000097504
Lamc3	78.6267	-0.442925	0.147659	-2.99965	0.0027029	0.047224	laminin gamma 3	ENSMUSG00000026840.14	23928	ENSMUSG00000026840	PI3K-Akt signaling pathway; Focal adhesion; ECM-receptor interaction; Toxoplasmosis; Amoebiasis; Human papillomavirus infection; Pathways in cancer; Small cell lung cancer	cell morphogenesis; cell adhesion; axon guidance; sensory organ development; visual perception; animal organ morphogenesis; tissue development; astrocyte development; radial glial cell differentiation; retina development in camera-type eye	extracellular region; basement membrane
Grin2d	12.0854	-0.442849	0.165962	-2.66837	0.00762196	0.0920532	glutamate receptor, ionotropic, NMDA2D (epsilon 4)	ENSMUSG00000002771.12	14814	ENSMUSG00000002771	Calcium signaling pathway; cAMP signaling pathway; Neuroactive ligand-receptor interaction; Neuroactive ligand signaling; Circadian entrainment; Long-term potentiation; Glutamatergic synapse; Alzheimer disease; Amyotrophic lateral sclerosis; Spinocerebellar ataxia; Prion disease; Pathways of neurodegeneration - multiple diseases; Cocaine addiction; Amphetamine addiction; Nicotine addiction; Alcoh…	startle response; monoatomic ion transport; adult locomotory behavior; calcium-mediated signaling; regulation of nervous system process; monoatomic ion transmembrane transport; ionotropic glutamate receptor signaling pathway; synaptic transmission, glutamatergic; regulation of synaptic plasticity; regulation of neuronal synaptic plasticity; neuromuscular process; regulation of sensory perception …	plasma membrane; membrane; NMDA selective glutamate receptor complex; presynaptic membrane; synapse; postsynaptic membrane; presynaptic active zone membrane; hippocampal mossy fiber to CA3 synapse; postsynaptic density membrane; glutamatergic synapse	glutamate-gated receptor activity; NMDA glutamate receptor activity; monoatomic ion channel activity; monoatomic cation channel activity; ligand-gated monoatomic ion channel activity; glutamate binding; voltage-gated monoatomic cation channel activity; glutamate-gated calcium ion channel activity; signaling receptor activity; ligand-gated monoatomic ion channel activity involved in regulation of …
Ccr10	11.3766	-0.441147	0.190083	-2.32081	0.0202969	0.160741	C-C motif chemokine receptor 10	ENSMUSG00000044052.3	12777	ENSMUSG00000044052	Cytokine-cytokine receptor interaction; Viral protein interaction with cytokine and cytokine receptor; Chemokine signaling pathway; Intestinal immune network for IgA production	chemotaxis; immune response; signal transduction; G protein-coupled receptor signaling pathway; positive regulation of cytosolic calcium ion concentration; calcium-mediated signaling; cell chemotaxis; chemokine-mediated signaling pathway	endoplasmic reticulum; plasma membrane; external side of plasma membrane; cell surface; membrane	G protein-coupled receptor activity; chemokine receptor activity; protein binding; C-C chemokine receptor activity; C-C chemokine binding
Tmem266	26.7075	-0.440555	0.175	-2.51746	0.0118206	0.115797	transmembrane protein 266	ENSMUSG00000032313.11	244886	ENSMUSG00000032313		monoatomic ion transport; transmembrane transport	cytosol; plasma membrane; membrane; dendrite; cell projection; perikaryon	protein homodimerization activity
Gm26587	19.4837	-0.439562	0.11577	-3.79687	0.000146536	0.00664458		ENSMUSG00000097470.1		ENSMUSG00000097470
Map3k6	89.0412	-0.437186	0.187511	-2.33152	0.0197259	0.15777	mitogen-activated protein kinase kinase kinase 6	ENSMUSG00000028862.6	53608	ENSMUSG00000028862	MAPK signaling pathway	MAPK cascade; JNK cascade; p38MAPK cascade		nucleotide binding; magnesium ion binding; protein kinase activity; protein serine/threonine kinase activity; MAP kinase kinase kinase activity; protein binding; ATP binding; kinase activity; transferase activity; metal ion binding; protein serine kinase activity
Slpi	39.6971	-0.436688	0.255754	-1.70746	0.0877375	0.350035	secretory leukocyte peptidase inhibitor	ENSMUSG00000017002.14	20568	ENSMUSG00000017002		immune system process; immune response; antibacterial humoral response; response to lipopolysaccharide; defense response to bacterium; negative regulation of viral genome replication; innate immune response; host-mediated perturbation of symbiont process	extracellular region; extracellular space; Golgi apparatus	DNA binding; mRNA binding; endopeptidase inhibitor activity; serine-type endopeptidase inhibitor activity; protein binding; enzyme binding; peptidase inhibitor activity
Cpe	23.8135	-0.436597	0.230796	-1.8917	0.0585311	0.285451	carboxypeptidase E	ENSMUSG00000037852.8	12876	ENSMUSG00000037852	Type I diabetes mellitus	neuron migration; cardiac left ventricle morphogenesis; proteolysis; peptide metabolic process; intracellular protein localization; Wnt signaling pathway; protein processing; insulin processing; peptide hormone secretion; protein localization to secretory granule; enkephalin processing; insulin secretion involved in cellular response to glucose stimulus; peptide catabolic process; cellular respon…	extracellular region; extracellular space; nucleus; cytoplasm; Golgi apparatus; endomembrane system; membrane; transport vesicle; secretory granule; dendrite; transport vesicle membrane; secretory granule membrane; dense core granule; cytoplasmic vesicle; neuronal cell body; perikaryon; synaptic membrane	carboxypeptidase activity; metallocarboxypeptidase activity; protein binding; peptidase activity; metallopeptidase activity; zinc ion binding; hydrolase activity; protein domain specific binding; neurexin family protein binding; metal ion binding; cell adhesion molecule binding; cobalt ion binding
Avpr1a	347.86	-0.436382	0.152952	-2.85307	0.00432997	0.0650119	arginine vasopressin receptor 1A	ENSMUSG00000020123.5	54140	ENSMUSG00000020123	Calcium signaling pathway; Phospholipase D signaling pathway; Neuroactive ligand-receptor interaction; Hormone signaling; Vascular smooth muscle contraction	regulation of systemic arterial blood pressure by vasopressin; maternal aggressive behavior; positive regulation of systemic arterial blood pressure; signal transduction; G protein-coupled receptor signaling pathway; positive regulation of cytosolic calcium ion concentration; negative regulation of female receptivity; grooming behavior; regulation of blood pressure; positive regulation of cell po…	endosome; plasma membrane; membrane; endocytic vesicle	G protein-coupled receptor activity; vasopressin receptor activity; peptide hormone binding; V1A vasopressin receptor binding
6330416G13Rik	158.824	-0.433339	0.12163	-3.56277	0.000366965	0.0122469		ENSMUSG00000045917.17
Gm26708	14.5888	-0.432613	0.155971	-2.77368	0.00554261	0.0748473	predicted gene, 26708	ENSMUSG00000097016.2	120623200	ENSMUSG00000097016
Pde4b	295.447	-0.431878	0.12547	-3.44208	0.000577258	0.0169038	phosphodiesterase 4B, cAMP specific	ENSMUSG00000028525.16	18578	ENSMUSG00000028525	Purine metabolism; Metabolic pathways; cAMP signaling pathway; Parathyroid hormone synthesis, secretion and action; Morphine addiction	neutrophil homeostasis; cAMP catabolic process; signal transduction; neutrophil chemotaxis; positive regulation of type II interferon production; positive regulation of interleukin-2 production; T cell receptor signaling pathway; leukocyte migration; cellular response to lipopolysaccharide; cellular response to xenobiotic stimulus; cellular response to epinephrine stimulus; negative regulation of…	gamma-tubulin complex; centrosome; cytosol; voltage-gated calcium channel complex; synaptic vesicle; postsynaptic density; membrane; Z disc; dendritic spine; perinuclear region of cytoplasm; excitatory synapse; cell periphery	3',5'-cyclic-nucleotide phosphodiesterase activity; 3',5'-cyclic-AMP phosphodiesterase activity; calcium channel regulator activity; protein binding; phosphoric diester hydrolase activity; hydrolase activity; cAMP binding; gamma-tubulin binding; transmembrane transporter binding; metal ion binding; 3',5'-cyclic-GMP phosphodiesterase activity
Hoxa3	13.9998	-0.431342	0.152608	-2.82646	0.00470655	0.0678616	homeobox A3	ENSMUSG00000079560.13	15400	ENSMUSG00000079560		angiogenesis; blood vessel remodeling; regulation of DNA-templated transcription; regulation of transcription by RNA polymerase II; calcium ion transport; animal organ morphogenesis; anterior/posterior pattern specification; specification of animal organ position; gene expression; magnesium ion homeostasis; glossopharyngeal nerve morphogenesis; bone mineralization; thyroid gland development; thym…	nucleus; nucleoplasm	RNA polymerase II cis-regulatory region sequence-specific DNA binding; DNA-binding transcription factor activity, RNA polymerase II-specific; DNA binding; DNA-binding transcription factor activity; HMG box domain binding
Spp1	1102.85	-0.430845	0.135662	-3.17587	0.0014939	0.0317649	secreted phosphoprotein 1	ENSMUSG00000029304.14	20750	ENSMUSG00000029304	PI3K-Akt signaling pathway; Apelin signaling pathway; Focal adhesion; ECM-receptor interaction; Toll-like receptor signaling pathway; GnRH secretion; Human papillomavirus infection	ossification; osteoblast differentiation; androgen catabolic process; intracellular calcium ion homeostasis; intracellular sodium ion homeostasis; cell adhesion; signal transduction; positive regulation of cell-substrate adhesion; bone mineralization; neutrophil chemotaxis; intracellular phosphate ion homeostasis; intracellular chloride ion homeostasis; biomineral tissue development; response to …	extracellular region; extracellular space; cytoplasm; Golgi apparatus; vesicle; cell projection; apical part of cell; perinuclear region of cytoplasm	cytokine activity; integrin binding; small molecule binding; extracellular matrix binding
Tes	24.3036	-0.430134	0.161514	-2.66313	0.00774174	0.0930518	testin LIM domain protein	ENSMUSG00000029552.19	21753	ENSMUSG00000029552		negative regulation of cell population proliferation	cytoplasm; cytosol; plasma membrane; focal adhesion; cell junction; protein-containing complex; anchoring junction	zinc ion binding; metal ion binding
Ppp1r1b	201.393	-0.430131	0.107397	-4.00506	6.20015e-05	0.0038132	protein phosphatase 1, regulatory inhibitor subunit 1B	ENSMUSG00000061718.12	19049	ENSMUSG00000061718	cAMP signaling pathway; Dopaminergic synapse; Cocaine addiction; Amphetamine addiction; Alcoholism	response to amphetamine; DNA-templated transcription; signal transduction; memory; negative regulation of female receptivity; locomotory behavior; visual learning; response to nicotine; intracellular signal transduction; response to cocaine; response to morphine; behavioral response to cocaine; cellular response to cocaine	nucleus; cytoplasm; neuronal cell body; dendritic spine neck; dendritic spine head; postsynapse; glutamatergic synapse	protein phosphatase inhibitor activity; protein serine/threonine phosphatase inhibitor activity; D1 dopamine receptor binding; D2 dopamine receptor binding; D3 dopamine receptor binding; D4 dopamine receptor binding; D5 dopamine receptor binding
Gm7694	216.716	-0.430036	0.104837	-4.10195	4.09682e-05	0.0029081	predicted gene 7694	ENSMUSG00000102752.1	665574	ENSMUSG00000102752		biological_process	cellular_component	molecular_function
Tkfc	14939.2	0.345272	0.0855183	4.03741	5.40447e-05	0.00344009	triokinase, FMN cyclase	ENSMUSG00000034371.8	225913	ENSMUSG00000034371	Fructose and mannose metabolism; Glycerolipid metabolism; Metabolic pathways; Carbon metabolism; RIG-I-like receptor signaling pathway	carbohydrate metabolic process; glycerol metabolic process; glycerol catabolic process; negative regulation of MDA-5 signaling pathway; regulation of innate immune response; carbohydrate phosphorylation; fructose catabolic process to hydroxyacetone phosphate and glyceraldehyde-3-phosphate; glycolytic process through fructose-1-phosphate	cytosol	nucleotide binding; catalytic activity; glycerone kinase activity; protein binding; ATP binding; kinase activity; transferase activity; lyase activity; FAD-AMP lyase (cyclizing) activity; metal ion binding; triokinase activity
Gspt2	13.5923	-0.428781	0.155971	-2.74912	0.00597561	0.0788106	G1 to S phase transition 2	ENSMUSG00000071723.7	14853	ENSMUSG00000071723	mRNA surveillance pathway	nuclear-transcribed mRNA catabolic process, nonsense-mediated decay; translation; translational termination	cytoplasm; cytosol; translation release factor complex	nucleotide binding; translation release factor activity; GTPase activity; GTP binding; hydrolase activity
Cntnap1	249.58	-0.428188	0.23096	-1.85395	0.0637466	0.2969	contactin associated protein-like 1	ENSMUSG00000017167.6	53321	ENSMUSG00000017167	Cell adhesion molecules; IgSF CAM signaling	protein localization to paranode region of axon; mitochondrion organization; cytoskeleton organization; cell adhesion; nervous system development; axonogenesis; neuronal action potential propagation; central nervous system myelination; myelination in peripheral nervous system; paranodal junction assembly; neuron projection development; cell junction assembly; cell junction maintenance; myelinatio…	plasma membrane; septate junction; membrane; axon; paranodal junction; paranode region of axon; myelin sheath; main axon; presynaptic active zone; anchoring junction; glutamatergic synapse	protein binding; SH3 domain binding
Fst	43.2087	-0.427751	0.174326	-2.45375	0.0141377	0.128903	follistatin	ENSMUSG00000021765.7	14313	ENSMUSG00000021765	TGF-beta signaling pathway	negative regulation of transcription by RNA polymerase II; skeletal system development; hematopoietic progenitor cell differentiation; gamete generation; pattern specification process; female gonad development; cell differentiation; BMP signaling pathway; regulation of BMP signaling pathway; negative regulation of epithelial cell differentiation; hair follicle morphogenesis; negative regulation o…	extracellular region; extracellular space; nucleus; nucleolus; cytoplasm	activin receptor antagonist activity; heparan sulfate proteoglycan binding; activin binding
Mid1	34.6595	-0.427679	0.161608	-2.6464	0.00813546	0.0961017	midline 1	ENSMUSG00000035299.16	17318	ENSMUSG00000035299	Ubiquitin mediated proteolysis	negative regulation of microtubule depolymerization; positive regulation of stress-activated MAPK cascade; protein localization to microtubule; regulation of microtubule cytoskeleton organization	cytoplasm; Golgi apparatus; cytosol; cytoskeleton; microtubule; cytoplasmic microtubule; microtubule cytoskeleton; centriolar satellite	protein binding; microtubule binding; zinc ion binding; transferase activity; enzyme binding; ubiquitin protein ligase binding; identical protein binding; protein homodimerization activity; metal ion binding; phosphoprotein binding; ubiquitin protein ligase activity
Gfpt2	13.5893	-0.427464	0.190289	-2.24639	0.024679	0.179217	glutamine fructose-6-phosphate transaminase 2	ENSMUSG00000020363.6	14584	ENSMUSG00000020363	Alanine, aspartate and glutamate metabolism; Amino sugar and nucleotide sugar metabolism; Metabolic pathways; Biosynthesis of nucleotide sugars; Insulin resistance; Diabetic cardiomyopathy	fructose 6-phosphate metabolic process; UDP-N-acetylglucosamine metabolic process; UDP-N-acetylglucosamine biosynthetic process; protein N-linked glycosylation; glutamine metabolic process; carbohydrate derivative metabolic process; carbohydrate derivative biosynthetic process; cellular response to leukemia inhibitory factor		glutamine-fructose-6-phosphate transaminase (isomerizing) activity; transaminase activity; transferase activity; carbohydrate derivative binding
Casz1	29.4549	-0.426995	0.157984	-2.70277	0.0068764	0.0861647	castor zinc finger 1	ENSMUSG00000028977.16	69743	ENSMUSG00000028977		regulation of DNA-templated transcription; regulation of neuron differentiation; negative regulation of neuron differentiation; negative regulation of glial cell differentiation; positive regulation of DNA-templated transcription; positive regulation of transcription by RNA polymerase II; radial glial cell differentiation; retinal bipolar neuron differentiation; retinal rod cell fate commitment; …	chromatin; nucleus; nucleoplasm; cytosol	RNA polymerase II transcription regulatory region sequence-specific DNA binding; DNA-binding transcription factor activity, RNA polymerase II-specific; DNA-binding transcription activator activity, RNA polymerase II-specific; DNA binding; zinc ion binding; metal ion binding
Mir6397	13.8741	-0.426687	0.167832	-2.54235	0.0110111	0.112035	microRNA 6397	ENSMUSG00000098980.1	102465213	ENSMUSG00000098980
Gm43681	14.4675	-0.426502	0.156363	-2.72764	0.00637897	0.0824382		ENSMUSG00000106870.1		ENSMUSG00000106870
Dsg1c	633.914	-0.425868	0.138206	-3.0814	0.00206029	0.0393984	desmoglein 1 gamma	ENSMUSG00000034774.6	211924	ENSMUSG00000034774	Cornified envelope formation; Staphylococcus aureus infection	cell adhesion; homophilic cell adhesion via plasma membrane adhesion molecules; protein stabilization; cell-cell adhesion	nucleus; cytoplasm; plasma membrane; cell-cell junction; cytoplasmic side of plasma membrane; membrane; apical plasma membrane; lateral plasma membrane; desmosome; anchoring junction	calcium ion binding; gamma-catenin binding; metal ion binding
Plat	18.2045	-0.42476	0.253741	-1.67399	0.0941324	0.362776	plasminogen activator, tissue	ENSMUSG00000031538.6	18791	ENSMUSG00000031538	Apelin signaling pathway; Complement and coagulation cascades; Transcriptional misregulation in cancer; Prostate cancer; Fluid shear stress and atherosclerosis	response to hypoxia; proteolysis; negative regulation of plasminogen activation; smooth muscle cell migration; plasminogen activation; synaptic transmission, glutamatergic; negative regulation of proteolysis; platelet-derived growth factor receptor signaling pathway; negative regulation of fibrinolysis; prevention of polyspermy; trans-synaptic signaling by BDNF, modulating synaptic transmission	extracellular region; extracellular space; cytoplasm; cell surface; secretory granule; apical part of cell; serine protease inhibitor complex; Schaffer collateral - CA1 synapse; postsynapse; glutamatergic synapse; neuronal dense core vesicle; perisynaptic space	serine-type endopeptidase activity; signaling receptor binding; peptidase activity; serine-type peptidase activity; hydrolase activity; phosphoprotein binding
Gm11342	15.7399	-0.424377	0.154832	-2.74089	0.00612727	0.0804196	predicted gene 11342	ENSMUSG00000084788.1	102636681	ENSMUSG00000084788
Ackr3	19.8445	-0.423764	0.209879	-2.01908	0.0434784	0.245617	atypical chemokine receptor 3	ENSMUSG00000044337.5	12778	ENSMUSG00000044337	Cytokine-cytokine receptor interaction; Viral protein interaction with cytokine and cytokine receptor	angiogenesis; vasculogenesis; chemotaxis; immune response; cell adhesion; signal transduction; G protein-coupled receptor signaling pathway; positive regulation of cytosolic calcium ion concentration; negative regulation of cell population proliferation; calcium-mediated signaling; oculomotor nerve development; receptor internalization; cell chemotaxis; chemokine-mediated signaling pathway; posit…	endosome; early endosome; plasma membrane; clathrin-coated pit; external side of plasma membrane; cell surface; membrane; recycling endosome	G protein-coupled receptor activity; scavenger receptor activity; coreceptor activity; C-C chemokine receptor activity; C-X-C chemokine receptor activity; chemokine binding; C-C chemokine binding; C-X-C chemokine binding
Gm44014	13.9328	-0.423635	0.165541	-2.5591	0.0104945	0.109113		ENSMUSG00000107915.1		ENSMUSG00000107915
Gm37736	37.8459	-0.420975	0.217229	-1.93793	0.0526316	0.271117		ENSMUSG00000104501.1		ENSMUSG00000104501
Efna3	29.8716	-0.419069	0.2823	-1.48448	0.137682	0.442553	ephrin A3	ENSMUSG00000028039.11	13638	ENSMUSG00000028039	MAPK signaling pathway; Ras signaling pathway; Rap1 signaling pathway; PI3K-Akt signaling pathway; Axon guidance; MicroRNAs in cancer	axon guidance; negative regulation of angiogenesis; regulation of neuron differentiation; ephrin receptor signaling pathway; positive regulation of amyloid precursor protein catabolic process	plasma membrane; membrane; side of membrane	ephrin receptor binding
Gimd1	62.5572	-0.418541	0.140486	-2.97924	0.00288964	0.0494045	GIMAP family P-loop NTPase domain containing 1	ENSMUSG00000091721.3	433653	ENSMUSG00000091721		biological_process	cellular_component	nucleotide binding; molecular_function; GTPase activity; GTP binding
Bst1	13.9882	-0.418451	0.247887	-1.68807	0.0913971	0.356795	bone marrow stromal cell antigen 1	ENSMUSG00000029082.17	12182	ENSMUSG00000029082	Nicotinate and nicotinamide metabolism; Metabolic pathways; Salivary secretion; Pancreatic secretion	regulation of cell-matrix adhesion; positive regulation of cell population proliferation; positive regulation of B cell proliferation; regulation of actin cytoskeleton organization; regulation of inflammatory response; regulation of calcium-mediated signaling; regulation of neutrophil chemotaxis	uropod; plasma membrane; membrane; side of membrane	transferase activity; hydrolase activity; hydrolase activity, acting on glycosyl bonds; phosphorus-oxygen lyase activity; NAD+ nucleosidase activity, cyclic ADP-ribose generating
Sult2a7	54.4026	-0.417974	0.169041	-2.47261	0.013413	0.124643	sulfotransferase family 2A, dehydroepiandrosterone (DHEA)-preferring, member 7	ENSMUSG00000094156.2	638251	ENSMUSG00000094156	Metabolism of xenobiotics by cytochrome P450; Bile secretion; Chemical carcinogenesis - DNA adducts	ethanol catabolic process; xenobiotic metabolic process; steroid metabolic process; cholesterol metabolic process; thyroid hormone metabolic process; 3'-phosphoadenosine 5'-phosphosulfate metabolic process; sulfation	cytoplasm; cytosol	alcohol sulfotransferase activity; sulfotransferase activity; transferase activity; bile-salt sulfotransferase activity; steroid sulfotransferase activity; 3'-phosphoadenosine 5'-phosphosulfate binding
Tnfsf12	182.068	-0.41791	0.0987561	-4.23174	2.31895e-05	0.00191709	tumor necrosis factor (ligand) superfamily, member 12	ENSMUSG00000097328.7	21944	ENSMUSG00000097328	Cytokine-cytokine receptor interaction	angiogenesis; apoptotic process; immune response; signal transduction; cell differentiation; positive regulation of protein catabolic process; extrinsic apoptotic signaling pathway; positive regulation of extrinsic apoptotic signaling pathway	extracellular region; extracellular space; plasma membrane; membrane; perinuclear region of cytoplasm	cytokine activity; tumor necrosis factor receptor binding
Gm16174	35.468	-0.416868	0.126296	-3.30072	0.000964355	0.0232854	predicted gene 16174	ENSMUSG00000087593.1	102638408
Igsf9	21.4788	-0.415695	0.166447	-2.49746	0.0125088	0.119264	immunoglobulin superfamily, member 9	ENSMUSG00000037995.15	93842	ENSMUSG00000037995		homophilic cell adhesion via plasma membrane adhesion molecules; nervous system development; dendrite development; cell differentiation; regulation of synapse organization; regulation of synapse maturation; cell-cell adhesion	plasma membrane; membrane; axon; dendrite; synapse; inhibitory synapse; postsynaptic density membrane; glutamatergic synapse	cell-cell adhesion mediator activity
Zap70	254.755	-0.413341	0.112017	-3.69	0.000224256	0.00894255	zeta-chain (TCR) associated protein kinase	ENSMUSG00000026117.10	22637	ENSMUSG00000026117	Ras signaling pathway; NF-kappa B signaling pathway; Natural killer cell mediated cytotoxicity; Th1 and Th2 cell differentiation; Th17 cell differentiation; T cell receptor signaling pathway; Yersinia infection; PD-L1 expression and PD-1 checkpoint pathway in cancer; Primary immunodeficiency	adaptive immune response; immune system process; immune response; intracellular signal transduction; beta selection; positive regulation of MAPK cascade; positive thymic T cell selection; negative thymic T cell selection; thymic T cell selection; positive regulation of T cell differentiation; positive regulation of alpha-beta T cell differentiation; positive regulation of alpha-beta T cell prolif…	immunological synapse; cytoplasm; cytosol; plasma membrane; cell-cell junction; membrane; T cell receptor complex; membrane raft	nucleotide binding; phosphotyrosine residue binding; protein kinase activity; protein tyrosine kinase activity; non-membrane spanning protein tyrosine kinase activity; protein binding; ATP binding; kinase activity; transferase activity
Gm42944	12.669	-0.413101	0.198894	-2.07699	0.0378026	0.227126		ENSMUSG00000104918.1		ENSMUSG00000104918
Mamstr	12.1137	-0.412323	0.163508	-2.52173	0.0116778	0.115147	MEF2 activating motif and SAP domain containing transcriptional regulator	ENSMUSG00000042918.17	74490	ENSMUSG00000042918		regulation of transcription by RNA polymerase II; positive regulation of myotube differentiation; positive regulation of transcription by RNA polymerase II	nucleus	transcription coregulator activity; protein binding
Egfr	8852.77	-0.411999	0.236009	-1.74569	0.0808644	0.337757	epidermal growth factor receptor	ENSMUSG00000020122.16	13649	ENSMUSG00000020122	EGFR tyrosine kinase inhibitor resistance; Endocrine resistance; Virion - Hepatitis viruses; MAPK signaling pathway; ErbB signaling pathway; Ras signaling pathway; Rap1 signaling pathway; Calcium signaling pathway; HIF-1 signaling pathway; FoxO signaling pathway; Phospholipase D signaling pathway; Endocytosis; PI3K-Akt signaling pathway; Focal adhesion; Adherens junction; Gap junction; JAK-STAT s…	cell morphogenesis; embryonic placenta development; positive regulation of protein phosphorylation; hair follicle development; translation; ubiquitin-dependent protein catabolic process; signal transduction; cell surface receptor signaling pathway; cell surface receptor protein tyrosine kinase signaling pathway; epidermal growth factor receptor signaling pathway; salivary gland morphogenesis; lea…	Golgi membrane; nucleus; cytoplasm; endosome; endoplasmic reticulum; endoplasmic reticulum membrane; Golgi apparatus; cytosol; plasma membrane; cilium; basal plasma membrane; cell surface; endosome membrane; membrane; basolateral plasma membrane; apical plasma membrane; cell junction; endocytic vesicle; early endosome membrane; nuclear membrane; ruffle membrane; protein-containing complex; ciliar…	nucleotide binding; chromatin binding; protein kinase activity; protein tyrosine kinase activity; transmembrane receptor protein tyrosine kinase activity; transmembrane signaling receptor activity; epidermal growth factor receptor activity; signaling receptor binding; integrin binding; protein binding; calmodulin binding; ATP binding; kinase activity; transferase activity; enzyme binding; kinase …
Rapgef4os3	55.7794	-0.410734	0.252784	-1.62484	0.104196	0.383884	Rap guanine nucleotide exchange factor (GEF) 4, opposite strand 3	ENSMUSG00000086231.1	380612	ENSMUSG00000086231
Gm15998	94.8923	-0.409811	0.298867	-1.37121	0.170308	0.48941	predicted gene 15998	ENSMUSG00000086389.1	100038411	ENSMUSG00000086389
Coro6	14.744	-0.409073	0.25748	-1.58876	0.112115	0.400015	coronin 6	ENSMUSG00000020836.15	216961	ENSMUSG00000020836		actin filament organization; cell migration		actin filament binding
Bbs1	41.1777	-0.408871	0.0993612	-4.115	3.87185e-05	0.0028072	Bardet-Biedl syndrome 1	ENSMUSG00000006464.8	52028	ENSMUSG00000006464		microtubule cytoskeleton organization; neuron migration; retina homeostasis; lipid metabolic process; visual perception; sensory perception of smell; intracellular protein localization; photoreceptor cell morphogenesis; fertilization; protein transport; dendrite development; ventricular system development; striatum development; hippocampus development; cerebral cortex development; cell projection…	cytoplasm; centrosome; cytoskeleton; plasma membrane; cilium; axoneme; membrane; motile cilium; centriolar satellite; BBSome; ciliary basal body; cell projection; ciliary membrane	signaling receptor binding; patched binding; smoothened binding; protein binding; phosphoprotein binding; RNA polymerase II-specific DNA-binding transcription factor binding
Cyp26b1	79.0322	-0.408711	0.324793	-1.25837	0.208257	0.537613	cytochrome P450, family 26, subfamily b, polypeptide 1	ENSMUSG00000063415.12	232174	ENSMUSG00000063415	Retinol metabolism; Metabolic pathways	cell fate determination; establishment of T cell polarity; kidney development; lipid metabolic process; xenobiotic metabolic process; inflammatory response; male meiotic nuclear division; spermatogenesis; central nervous system development; proximal/distal pattern formation; positive regulation of gene expression; embryonic limb morphogenesis; response to retinoic acid; response to vitamin A; ret…	cytoplasm; endoplasmic reticulum; endoplasmic reticulum membrane; membrane	retinoic acid binding; monooxygenase activity; iron ion binding; retinoic acid 4-hydroxylase activity; oxidoreductase activity; oxidoreductase activity, acting on paired donors, with incorporation or reduction of molecular oxygen; oxidoreductase activity, acting on paired donors, with incorporation or reduction of molecular oxygen, NAD(P)H as one donor, and incorporation of one atom of oxygen; he…
Irx3	23.6673	-0.407883	0.213285	-1.91238	0.0558274	0.279424	Iroquois related homeobox 3	ENSMUSG00000031734.13	16373	ENSMUSG00000031734		negative regulation of transcription by RNA polymerase II; metanephros development; kidney development; Purkinje myocyte development; atrioventricular bundle cell differentiation; regulation of DNA-templated transcription; regulation of transcription by RNA polymerase II; mesoderm development; neuron differentiation; negative regulation of neuron differentiation; positive regulation of neuron dif…	nucleus; cytoplasm; axon	RNA polymerase II cis-regulatory region sequence-specific DNA binding; DNA-binding transcription factor activity, RNA polymerase II-specific; DNA-binding transcription repressor activity, RNA polymerase II-specific; DNA-binding transcription activator activity, RNA polymerase II-specific; DNA binding; sequence-specific double-stranded DNA binding
4930451G09Rik	11.3043	-0.407669	0.144642	-2.81848	0.00482517	0.0687339		ENSMUSG00000022543.8
Cela1	482.611	-0.407621	0.166597	-2.44675	0.0144149	0.13064	chymotrypsin-like elastase family, member 1	ENSMUSG00000023031.7	109901	ENSMUSG00000023031		negative regulation of transcription by RNA polymerase II; proteolysis; inflammatory response; post-embryonic development; Wnt signaling pathway; exocrine pancreas development; multicellular organism growth; regulation of cell population proliferation; regulation of cell differentiation; positive regulation of angiogenesis; positive regulation of transcription by RNA polymerase II; tissue remodel…	extracellular region; extracellular space; extracellular matrix	serine-type endopeptidase activity; peptidase activity; serine-type peptidase activity; hydrolase activity; serine hydrolase activity; metal ion binding
Lrrc16a	654.66	-0.407532	0.114873	-3.54766	0.000388667	0.0126278		ENSMUSG00000021338.17
Slc39a14	7267.91	-0.406379	0.0920247	-4.41598	1.00554e-05	0.00109569	solute carrier family 39 (zinc transporter), member 14	ENSMUSG00000022094.15	213053	ENSMUSG00000022094	Ferroptosis; Alzheimer disease; Parkinson disease	chondrocyte differentiation; gluconeogenesis; monoatomic ion transport; iron ion transport; zinc ion transport; intracellular zinc ion homeostasis; insulin receptor signaling pathway; regulation of hormone levels; bicarbonate transport; metal ion transport; intracellular monoatomic cation homeostasis; cellular response to insulin stimulus; iron import into cell; iron ion transmembrane transport; …	lysosome; lysosomal membrane; endosome; plasma membrane; membrane; basolateral plasma membrane; apical plasma membrane; early endosome membrane; late endosome membrane	iron ion transmembrane transporter activity; manganese ion transmembrane transporter activity; zinc ion transmembrane transporter activity; cadmium ion transmembrane transporter activity; ferrous iron transmembrane transporter activity; monoatomic anion:monoatomic cation symporter activity; metal ion transmembrane transporter activity; monoatomic cation:bicarbonate symporter activity
Mup16	804.499	-0.405508	0.275064	-1.47423	0.14042	0.446382	major urinary protein 16	ENSMUSG00000078675.9	100039177	ENSMUSG00000078675
Adnp	38.5455	-0.404625	0.13196	-3.06627	0.00216751	0.0409861	activity-dependent neuroprotective protein	ENSMUSG00000051149.15	11538	ENSMUSG00000051149		regulation of transcription by RNA polymerase II; short-term memory; response to carbohydrate; regulation of gene expression; negative regulation of gene expression; positive regulation of neuron projection development; cGMP-mediated signaling; neuron differentiation; intracellular nitric oxide homeostasis; negative regulation of neuron apoptotic process; estrous cycle; positive regulation of axo…	extracellular space; nucleus; chromosome; axon; dendrite; neuronal cell body; RNA polymerase II transcription regulator complex	RNA polymerase II transcription regulatory region sequence-specific DNA binding; DNA-binding transcription factor activity, RNA polymerase II-specific; DNA binding; chromatin binding; copper ion binding; protein binding; beta-catenin binding; zinc ion binding; peptide binding; metal ion binding; beta-tubulin binding
Zfp618	30.4579	-0.403956	0.141992	-2.84493	0.00444215	0.0659412	zinc finger protein 618	ENSMUSG00000028358.15	72701	ENSMUSG00000028358		chromatin organization	chromatin; nucleus; chromosome; pericentric heterochromatin	transcription coregulator binding; DNA binding; zinc ion binding; identical protein binding; metal ion binding; chromatin-protein adaptor activity
Dnmt3b	38.7975	-0.403642	0.103718	-3.89174	9.95274e-05	0.00503505	DNA methyltransferase 3B	ENSMUSG00000027478.15	13436	ENSMUSG00000027478	Cysteine and methionine metabolism; Metabolic pathways; MicroRNAs in cancer	negative regulation of transcription by RNA polymerase II; developmental process involved in reproduction; DNA methylation-dependent constitutive heterochromatin formation; gamete generation; regulation of gene expression; positive regulation of gene expression; protein-containing complex localization; heterochromatin formation; methylation; epigenetic regulation of gene expression; epigenetic pr…	chromosome, centromeric region; heterochromatin; nucleus; nucleoplasm; catalytic complex	DNA binding; chromatin binding; transcription corepressor activity; DNA (cytosine-5-)-methyltransferase activity; protein binding; methyltransferase activity; zinc ion binding; DNA-methyltransferase activity; transferase activity; histone deacetylase binding; metal ion binding; DNA (cytosine-5-)-methyltransferase activity, acting on CpG substrates; DNA (cytosine-5-)-methyltransferase activity, ac…
Gm10509	11.3465	-0.403468	0.159065	-2.53649	0.0111969	0.113036	predicted gene 10509	ENSMUSG00000073448.1	100310809	ENSMUSG00000073448		regulation of DNA-templated transcription	nucleus	DNA binding; zinc ion binding; metal ion binding
Irf5	263.418	-0.403287	0.119581	-3.37251	0.000744871	0.0198019	interferon regulatory factor 5	ENSMUSG00000029771.12	27056	ENSMUSG00000029771	Toll-like receptor signaling pathway	immune system process; positive regulation of cytokine production involved in immune response; regulation of DNA-templated transcription; regulation of transcription by RNA polymerase II; inflammatory response; cytokine-mediated signaling pathway; positive regulation of type I interferon production; positive regulation of interferon-alpha production; positive regulation of interferon-beta product…	nucleus; cytoplasm	transcription cis-regulatory region binding; RNA polymerase II cis-regulatory region sequence-specific DNA binding; DNA-binding transcription factor activity, RNA polymerase II-specific; DNA-binding transcription activator activity, RNA polymerase II-specific; DNA binding; DNA-binding transcription factor activity; protein binding; protein kinase binding; identical protein binding; sequence-speci…
Fzd8	823.083	-0.402999	0.125575	-3.20923	0.0013309	0.0293404	frizzled class receptor 8	ENSMUSG00000036904.5	14370	ENSMUSG00000036904	mTOR signaling pathway; Wnt signaling pathway; Hippo signaling pathway; Signaling pathways regulating pluripotency of stem cells; Melanogenesis; Cushing syndrome; Alzheimer disease; Pathways of neurodegeneration - multiple diseases; Human papillomavirus infection; Pathways in cancer; Proteoglycans in cancer; Basal cell carcinoma; Breast cancer; Hepatocellular carcinoma; Gastric cancer	angiogenesis; signal transduction; cell surface receptor signaling pathway; G protein-coupled receptor signaling pathway; Wnt signaling pathway; T cell differentiation in thymus; non-canonical Wnt signaling pathway; canonical Wnt signaling pathway	extracellular region; Golgi apparatus; plasma membrane; membrane; neuronal dense core vesicle; Wnt-Frizzled-LRP5/6 complex	transmembrane signaling receptor activity; G protein-coupled receptor activity; signaling receptor binding; protein binding; Wnt-protein binding; PDZ domain binding; ubiquitin protein ligase binding; Wnt receptor activity
Lrp2	21.2607	-0.401702	0.235798	-1.70358	0.0884592	0.351916	low density lipoprotein receptor-related protein 2	ENSMUSG00000027070.14	14725	ENSMUSG00000027070	Hedgehog signaling pathway; Thyroid hormone synthesis; Cholesterol metabolism	kidney development; neural tube closure; secondary heart field specification; outflow tract septum morphogenesis; outflow tract morphogenesis; ventricular compact myocardium morphogenesis; cardiac septum development; ventricular septum development; alcohol metabolic process; endocytosis; receptor-mediated endocytosis; nervous system development; heart development; sensory perception of sound; cel…	extracellular space; endosome; endoplasmic reticulum; Golgi apparatus; plasma membrane; brush border; clathrin-coated pit; external side of plasma membrane; cell surface; membrane; apical plasma membrane; endocytic vesicle; axon; dendrite; brush border membrane; endosome lumen; protein-containing complex; cell projection; receptor complex; axonal growth cone; apical part of cell	calcium ion binding; protein binding; nuclear receptor binding; SH3 domain binding; PDZ domain binding; hemoglobin binding; insulin-like growth factor I binding; cargo receptor activity; hormone binding; protein-containing complex binding; metal ion binding; low-density lipoprotein particle receptor binding; protein-folding chaperone binding; protein transporter activity
Gucy2c	21.773	-0.40084	0.323887	-1.23759	0.215868	0.547156	guanylate cyclase 2c	ENSMUSG00000042638.14	14917	ENSMUSG00000042638	Purine metabolism; Metabolic pathways; Hormone signaling	cGMP biosynthetic process; receptor guanylyl cyclase signaling pathway; cyclic nucleotide biosynthetic process; response to toxic substance; intracellular signal transduction; regulation of cell population proliferation	endoplasmic reticulum; endoplasmic reticulum membrane; plasma membrane; membrane	nucleotide binding; peptide receptor activity; guanylate cyclase activity; protein kinase activity; ATP binding; GTP binding; toxic substance binding; lyase activity; phosphorus-oxygen lyase activity
Mal	13.8693	-0.399703	0.165017	-2.42219	0.0154274	0.136694	myelin and lymphocyte protein, T cell differentiation protein	ENSMUSG00000027375.14	17153	ENSMUSG00000027375		protein localization to paranode region of axon; central nervous system myelination; myelination; protein insertion into plasma membrane; positive regulation of extrinsic apoptotic signaling pathway via death domain receptors	endoplasmic reticulum; plasma membrane; membrane; apical plasma membrane; Schmidt-Lanterman incisure; plasma membrane raft; membrane raft; hinge region between urothelial plaques of apical plasma membrane	structural constituent of myelin sheath
Fmod	81.9864	-0.399703	0.202186	-1.97691	0.048052	0.258528	fibromodulin	ENSMUSG00000041559.7	14264	ENSMUSG00000041559	TGF-beta signaling pathway		extracellular region; extracellular space; extracellular matrix
Csf2rb2	35.4917	-0.397891	0.195314	-2.03719	0.0416313	0.240416	colony stimulating factor 2 receptor, beta 2, low-affinity (granulocyte-macrophage)	ENSMUSG00000071714.5	12984	ENSMUSG00000071714	Cytokine-cytokine receptor interaction; Apoptosis; JAK-STAT signaling pathway; Pathways in cancer	cell surface receptor signaling pathway via JAK-STAT; immunoglobulin mediated immune response; cytokine-mediated signaling pathway; interleukin-5-mediated signaling pathway; interleukin-3-mediated signaling pathway; granulocyte-macrophage colony-stimulating factor signaling pathway; positive regulation of leukocyte proliferation	plasma membrane; external side of plasma membrane; membrane; granulocyte macrophage colony-stimulating factor receptor complex	cytokine receptor activity; coreceptor activity
Aebp1	109.787	-0.396464	0.211408	-1.87535	0.0607447	0.290155	AE binding protein 1	ENSMUSG00000020473.13	11568	ENSMUSG00000020473		negative regulation of transcription by RNA polymerase II; regulation of DNA-templated transcription; proteolysis; regulation of collagen fibril organization	extracellular region; extracellular space; nucleus; cytoplasm	RNA polymerase II transcription regulatory region sequence-specific DNA binding; DNA-binding transcription repressor activity, RNA polymerase II-specific; DNA binding; carboxypeptidase activity; calmodulin binding; collagen binding; zinc ion binding
Lpin1	7539.48	-0.396235	0.246238	-1.60916	0.107582	0.39073	lipin 1	ENSMUSG00000020593.14	14245	ENSMUSG00000020593	Glycerolipid metabolism; Glycerophospholipid metabolism; Metabolic pathways; mTOR signaling pathway; Alcoholic liver disease	negative regulation of transcription by RNA polymerase II; mitochondrial fission; lipid metabolic process; triglyceride mobilization; immune response; fatty acid catabolic process; triglyceride biosynthetic process; actin cytoskeleton organization; ruffle organization; negative regulation of myelination; cellular response to insulin stimulus; fat cell differentiation; regulation of fat cell diffe…	nucleus; transcription regulator complex; cytoplasm; mitochondrion; mitochondrial outer membrane; endoplasmic reticulum; endoplasmic reticulum membrane; cytosol; membrane; nuclear membrane	transcription coactivator activity; protein binding; phosphatidate phosphatase activity; hydrolase activity; histone deacetylase binding; peroxisome proliferator activated receptor binding; RNA polymerase II-specific DNA-binding transcription factor binding
Gm16063	18.7352	-0.395935	0.181943	-2.17615	0.0295442	0.20008	predicted gene 16063	ENSMUSG00000085708.1	330183	ENSMUSG00000085708		biological_process	cellular_component	molecular_function
Ccdc120	35.0435	-0.394994	0.244932	-1.61267	0.106817	0.389203	coiled-coil domain containing 120	ENSMUSG00000031150.12	54648	ENSMUSG00000031150		intracellular protein localization; microtubule anchoring at centrosome	cytoplasm; endosome; centriole; cytoskeleton; growth cone; cell projection; neuron projection; centriolar subdistal appendage	molecular_function
Itgax	42.0335	-0.394807	0.181571	-2.1744	0.0296754	0.200404	integrin alpha X	ENSMUSG00000030789.9	16411	ENSMUSG00000030789	IgSF CAM signaling; Complement and coagulation cascades; Regulation of actin cytoskeleton; Tuberculosis	cell adhesion; cell-matrix adhesion; integrin-mediated signaling pathway; positive regulation of cell population proliferation; positive regulation of metabolic process; positive regulation of gene expression; positive regulation of cell migration; positive regulation of myelination; heterotypic cell-cell adhesion; positive regulation of angiogenesis; defense response to virus; cell-cell adhesion…	integrin complex; external side of plasma membrane; cell surface; membrane; integrin alphaX-beta2 complex	receptor tyrosine kinase binding; signaling receptor activity; metal ion binding
Ltbp2	35.4651	-0.393733	0.183933	-2.14063	0.0323041	0.208903	latent transforming growth factor beta binding protein 2	ENSMUSG00000002020.15	16997	ENSMUSG00000002020		supramolecular fiber organization	extracellular region; extracellular matrix	extracellular matrix structural constituent; calcium ion binding; heparin binding; growth factor binding; microfibril binding
Capn8	50.2011	-0.393213	0.267373	-1.47065	0.141386	0.447552	calpain 8	ENSMUSG00000038599.14	170725	ENSMUSG00000038599		proteolysis; calcium-dependent self proteolysis	cytoplasm; Golgi apparatus	calcium-dependent cysteine-type endopeptidase activity; peptidase activity; cysteine-type peptidase activity; hydrolase activity; identical protein binding; metal ion binding
St8sia3	16.9485	-0.392907	0.156067	-2.51756	0.0118172	0.115797	ST8 alpha-N-acetyl-neuraminide alpha-2,8-sialyltransferase 3	ENSMUSG00000056812.13	20451	ENSMUSG00000056812		ganglioside biosynthetic process; protein glycosylation; N-glycan processing; glycoprotein metabolic process; oligosaccharide metabolic process; sialylation	Golgi membrane; Golgi apparatus; membrane	alpha-N-acetylneuraminate alpha-2,8-sialyltransferase activity; sialyltransferase activity; transferase activity; glycosyltransferase activity; identical protein binding
Igfbp1	2710.76	-0.392584	0.173769	-2.25924	0.0238687	0.176102	insulin-like growth factor binding protein 1	ENSMUSG00000020429.7	16006	ENSMUSG00000020429		insulin receptor signaling pathway; positive regulation of cell growth; response to insulin; tissue regeneration; regulation of insulin-like growth factor receptor signaling pathway	extracellular region; extracellular space; Golgi apparatus	insulin-like growth factor binding; growth factor binding; insulin-like growth factor I binding; insulin-like growth factor II binding
Evpl	21.9364	-0.39255	0.134365	-2.92153	0.00348322	0.0560207	envoplakin	ENSMUSG00000034282.3	14027	ENSMUSG00000034282	Cornified envelope formation	regulation of antibacterial peptide production; keratinocyte differentiation; keratinization; wound healing; intermediate filament cytoskeleton organization	cornified envelope; cytoplasm; cytosol; cytoskeleton; intermediate filament; membrane; desmosome; intermediate filament cytoskeleton; anchoring junction	structural molecule activity
Prkag3	41.7393	-0.391929	0.236706	-1.65577	0.097769	0.370888	protein kinase, AMP-activated, gamma 3 non-catalytic subunit	ENSMUSG00000006542.13	241113	ENSMUSG00000006542	FoxO signaling pathway; AMPK signaling pathway; Longevity regulating pathway; Longevity regulating pathway - multiple species; Apelin signaling pathway; Tight junction; Circadian rhythm; Thermogenesis; Insulin signaling pathway; Adipocytokine signaling pathway; Oxytocin signaling pathway; Glucagon signaling pathway; Insulin resistance; Non-alcoholic fatty liver disease; Alcoholic liver disease; H…	regulation of glycolytic process; lipid metabolic process; fatty acid metabolic process; fatty acid biosynthetic process; response to muscle activity involved in regulation of muscle adaptation; cellular response to nutrient levels; cellular response to glucose starvation; regulation of carbon utilization; negative regulation of glycogen biosynthetic process; positive regulation of gluconeogenesis	nucleus; nucleoplasm; cytoplasm; cytosol; nucleotide-activated protein kinase complex	nucleotide binding; AMP-activated protein kinase activity; ATP binding; AMP binding; protein kinase regulator activity; protein kinase binding
Lect1	220.007	-0.390817	0.149619	-2.61209	0.00899911	0.100337		ENSMUSG00000022025.13
Slc6a7	15.1665	-0.389809	0.22374	-1.74224	0.0814668	0.338812	solute carrier family 6 (neurotransmitter transporter, L-proline), member 7	ENSMUSG00000052026.7	240332	ENSMUSG00000052026	Synaptic vesicle cycle	neurotransmitter transport; amino acid transport; proline transport; protein catabolic process; proline transmembrane transport; sodium ion transmembrane transport; glycine import across plasma membrane	plasma membrane; membrane; synaptic vesicle membrane; presynaptic membrane; synapse; synaptic membrane; Schaffer collateral - CA1 synapse; glutamatergic synapse	proline:sodium symporter activity; L-proline transmembrane transporter activity; symporter activity
Sult1d1	2800.14	-0.389369	0.0910362	-4.27708	1.89362e-05	0.00169947	sulfotransferase family 1D, member 1	ENSMUSG00000029273.10	53315	ENSMUSG00000029273		sulfate assimilation; catecholamine metabolic process; lipid metabolic process; sulfation	cytoplasm	aryl sulfotransferase activity; sulfotransferase activity; transferase activity
Gm17281	11.4472	-0.388655	0.216517	-1.79504	0.072648	0.318552	predicted gene, 17281	ENSMUSG00000097317.1	100503319
Prelid2	18.1078	-0.387566	0.218753	-1.7717	0.0764436	0.326785	PRELI domain containing 2	ENSMUSG00000056671.6	77619	ENSMUSG00000056671		phospholipid transport; intermembrane lipid transfer	mitochondrion; mitochondrial intermembrane space	phosphatidic acid transfer activity
Maml3	75.0707	-0.387547	0.116066	-3.33901	0.000840764	0.0212273	mastermind like transcriptional coactivator 3	ENSMUSG00000061143.15	433586	ENSMUSG00000061143	Notch signaling pathway; Th1 and Th2 cell differentiation; Human papillomavirus infection	Notch signaling pathway; positive regulation of transcription of Notch receptor target; positive regulation of transcription by RNA polymerase II	nucleus; nucleoplasm; nuclear speck	transcription coactivator activity
Gpd1	11243.8	0.286718	0.0663329	4.32242	1.5433e-05	0.00145847	glycerol-3-phosphate dehydrogenase 1 (soluble)	ENSMUSG00000023019.12	14555	ENSMUSG00000023019	Glycerophospholipid metabolism; Metabolic pathways	carbohydrate metabolic process; glycerol-3-phosphate metabolic process; gluconeogenesis; glycerol-3-phosphate shuttle; positive regulation of glycolytic process; glyceraldehyde-3-phosphate biosynthetic process; glycerol-3-phosphate catabolic process; glycerolipid metabolic process; cellular response to cAMP; cellular response to tumor necrosis factor	cytoplasm; mitochondrion; cytosol	glycerol-3-phosphate dehydrogenase (quinone) activity; oxidoreductase activity; oxidoreductase activity, acting on the CH-OH group of donors, NAD or NADP as acceptor; protein homodimerization activity; glycerol-3-phosphate dehydrogenase [NAD(P)+] activity; NAD binding; glycerol-3-phosphate dehydrogenase (NAD+) activity
Map3k14	115.433	-0.387254	0.11605	-3.33695	0.000847035	0.0213459	mitogen-activated protein kinase kinase kinase 14	ENSMUSG00000020941.7	53859	ENSMUSG00000020941	MAPK signaling pathway; NF-kappa B signaling pathway; Apoptosis; Osteoclast differentiation; C-type lectin receptor signaling pathway; T cell receptor signaling pathway; TNF signaling pathway; Intestinal immune network for IgA production; Alcoholic liver disease; Human T-cell leukemia virus 1 infection; Epstein-Barr virus infection; Chemical carcinogenesis - reactive oxygen species	MAPK cascade; immune response; non-canonical NF-kappaB signal transduction; defense response to virus; cellular response to mechanical stimulus	fibrillar center; nucleoplasm; cytoplasm; cytosol	nucleotide binding; protein kinase activity; protein serine/threonine kinase activity; MAP kinase kinase kinase activity; protein binding; ATP binding; kinase activity; transferase activity; protein serine kinase activity
3110082I17Rik	167.883	-0.386902	0.16464	-2.34999	0.0187737	0.153333		ENSMUSG00000053553.11
Scd3	60.1835	-0.386814	0.275004	-1.40658	0.159553	0.473559	stearoyl-coenzyme A desaturase 3	ENSMUSG00000025202.7	30049	ENSMUSG00000025202	Biosynthesis of unsaturated fatty acids; Metabolic pathways; Fatty acid metabolism; PPAR signaling pathway; AMPK signaling pathway; Alcoholic liver disease	lipid metabolic process; fatty acid metabolic process; fatty acid biosynthetic process; unsaturated fatty acid biosynthetic process; response to fatty acid; monounsaturated fatty acid biosynthetic process	nucleolus; endoplasmic reticulum; endoplasmic reticulum membrane; membrane	stearoyl-CoA 9-desaturase activity; iron ion binding; acyl-CoA desaturase activity; oxidoreductase activity; oxidoreductase activity, acting on paired donors, with oxidation of a pair of donors resulting in the reduction of molecular oxygen to two molecules of water; palmitoyl-CoA 9-desaturase activity; metal ion binding
Msln	61.896	-0.386003	0.305464	-1.26366	0.206352	0.534527	mesothelin	ENSMUSG00000063011.6	56047	ENSMUSG00000063011		cell adhesion; cell-matrix adhesion	extracellular region; extracellular space; Golgi apparatus; plasma membrane; cell surface; membrane; side of membrane	protein binding
Crispld2	42.6417	-0.386003	0.166407	-2.31963	0.0203609	0.160808	cysteine-rich secretory protein LCCL domain containing 2	ENSMUSG00000031825.16	78892	ENSMUSG00000031825		extracellular matrix organization; face morphogenesis	extracellular region; extracellular space; transport vesicle; extracellular matrix	glycosaminoglycan binding; heparin binding
Fads3	1284.05	-0.385957	0.186844	-2.06566	0.0388602	0.230576	fatty acid desaturase 3	ENSMUSG00000024664.4	60527	ENSMUSG00000024664		lipid metabolic process; fatty acid metabolic process; fatty acid biosynthetic process; unsaturated fatty acid biosynthetic process; sphingolipid metabolic process; gene expression	cellular_component; endoplasmic reticulum; endoplasmic reticulum membrane; membrane	oxidoreductase activity; oxidoreductase activity, acting on paired donors, with oxidation of a pair of donors resulting in the reduction of molecular oxygen to two molecules of water
Ccnd1	574.393	-0.385575	0.208153	-1.85237	0.0639728	0.297341	cyclin D1	ENSMUSG00000070348.5	12443	ENSMUSG00000070348	Endocrine resistance; FoxO signaling pathway; Cell cycle; p53 signaling pathway; PI3K-Akt signaling pathway; AMPK signaling pathway; Cellular senescence; Wnt signaling pathway; Hedgehog signaling pathway; Apelin signaling pathway; Hippo signaling pathway; Focal adhesion; Tight junction; JAK-STAT signaling pathway; Prolactin signaling pathway; Thyroid hormone signaling pathway; Oxytocin signaling …	G1/S transition of mitotic cell cycle; negative regulation of transcription by RNA polymerase II; re-entry into mitotic cell cycle; liver development; DNA damage response; lactation; cell population proliferation; positive regulation of cell population proliferation; response to xenobiotic stimulus; response to iron ion; response to X-ray; positive regulation of G2/M transition of mitotic cell cy…	cyclin-dependent protein kinase holoenzyme complex; nucleus; nucleoplasm; cytoplasm; microtubule organizing center; cytosol; bicellular tight junction; membrane; transcription repressor complex; nuclear membrane; cyclin D1-CDK4 complex; cyclin D1-CDK6 complex	transcription corepressor activity; protein kinase activity; protein binding; kinase activity; cyclin-dependent protein serine/threonine kinase regulator activity; enzyme binding; protein kinase binding; histone deacetylase binding; protein serine/threonine kinase activator activity; protein-containing complex binding; cyclin-dependent protein serine/threonine kinase activator activity; proline-r…
Adgrd1	43.2728	-0.385425	0.18851	-2.04459	0.0408954	0.237783	adhesion G protein-coupled receptor D1	ENSMUSG00000044017.16	243277	ENSMUSG00000044017		cell surface receptor signaling pathway; G protein-coupled receptor signaling pathway; adenylate cyclase-activating G protein-coupled receptor signaling pathway; regulation of skeletal muscle contraction; neurogenesis	nucleoplasm; cytosol; plasma membrane; membrane; nuclear speck	transmembrane signaling receptor activity; G protein-coupled receptor activity
Ccr2	42.2243	-0.385258	0.147268	-2.61603	0.00889596	0.100241	C-C motif chemokine receptor 2	ENSMUSG00000049103.13	12772	ENSMUSG00000049103	Cytokine-cytokine receptor interaction; Viral protein interaction with cytokine and cytokine receptor; Chemokine signaling pathway	angiogenesis; blood vessel remodeling; wound healing involved in inflammatory response; monocyte chemotaxis; regulation of T cell cytokine production; positive regulation of T-helper 1 type immune response; negative regulation of type 2 immune response; intracellular calcium ion homeostasis; chemotaxis; inflammatory response; immune response; humoral immune response; cellular defense response; si…	fibrillar center; cytoplasm; plasma membrane; external side of plasma membrane; membrane; dendrite; neuronal cell body; perikaryon; perinuclear region of cytoplasm; primary dendrite	G protein-coupled receptor activity; chemokine receptor activity; protein binding; C-C chemokine receptor activity; cytokine binding; CCR2 chemokine receptor binding; chemokine (C-C motif) ligand 2 binding; chemokine (C-C motif) ligand 12 binding; chemokine (C-C motif) ligand 7 binding; identical protein binding; chemokine (C-C motif) ligand 5 binding
Bbs4	80.1344	-0.384896	0.0863077	-4.45958	8.21217e-06	0.000951629	Bardet-Biedl syndrome 4	ENSMUSG00000025235.7	102774	ENSMUSG00000025235		microtubule cytoskeleton organization; mitotic cytokinesis; neuron migration; leukocyte homeostasis; B cell homeostasis; neural tube closure; retina homeostasis; lymphocyte homeostasis; myeloid cell homeostasis; negative regulation of systemic arterial blood pressure; centrosome cycle; spermatid development; sensory perception; sensory perception of smell; intracellular protein localization; gene…	pericentriolar material; photoreceptor outer segment; photoreceptor inner segment; nucleus; cytoplasm; centrosome; centriole; cytoskeleton; plasma membrane; cilium; membrane; motile cilium; photoreceptor connecting cilium; centriolar satellite; BBSome; ciliary transition zone; ciliary basal body; cell projection; ciliary membrane; non-motile cilium	protein binding; protein-macromolecule adaptor activity; dynactin binding; alpha-tubulin binding; beta-tubulin binding; RNA polymerase II-specific DNA-binding transcription factor binding
Gm16907	15.4404	-0.384087	0.177954	-2.15835	0.0309009	0.204104	predicted gene, 16907	ENSMUSG00000097242.1	100504114	ENSMUSG00000124381
Tnfsfm13	15.5436	-0.383353	0.168734	-2.27193	0.0230906	0.172551	tumor necrosis factor (ligand) superfamily, membrane-bound member 13	ENSMUSG00000018752.19	619441	ENSMUSG00000018752
Hexb	261.979	-0.38316	0.104762	-3.65742	0.000254769	0.00967551	hexosaminidase B	ENSMUSG00000021665.7	15212	ENSMUSG00000021665	Other glycan degradation; Various types of N-glycan biosynthesis; Amino sugar and nucleotide sugar metabolism; Glycosaminoglycan degradation; Sphingolipid metabolism; Glycosphingolipid biosynthesis - globo and isoglobo series; Glycosphingolipid biosynthesis - ganglio series; Metabolic pathways; Lysosome	skeletal system development; carbohydrate metabolic process; N-acetylglucosamine metabolic process; N-glycan processing; lipid metabolic process; glycosphingolipid metabolic process; ganglioside catabolic process; intracellular calcium ion homeostasis; lysosome organization; single fertilization; penetration of zona pellucida; sensory perception of sound; locomotory behavior; male courtship behav…	acrosomal vesicle; extracellular space; lysosome; membrane; cytoplasmic vesicle; azurophil granule; lysosomal lumen; cortical granule; beta-N-acetylhexosaminidase complex	hydrolase activity, hydrolyzing O-glycosyl compounds; beta-N-acetylhexosaminidase activity; acetylglucosaminyltransferase activity; hexosaminidase activity; beta-N-acetylglucosaminidase activity; hydrolase activity; hydrolase activity, acting on glycosyl bonds; carbohydrate binding; identical protein binding; protein-containing complex binding
Ttbk1	43.1613	-0.383028	0.150863	-2.53892	0.0111195	0.11259	tau tubulin kinase 1	ENSMUSG00000015599.8	106763	ENSMUSG00000015599		signal transduction; learning or memory; positive regulation of gene expression; negative regulation of gene expression; positive regulation of protein polymerization; positive regulation of astrocyte activation; positive regulation of microglial cell activation	nucleus; nucleoplasm; cytoplasm; cytosol; microtubule associated complex; microtubule cytoskeleton; neuronal cell body; perinuclear region of cytoplasm	nucleotide binding; protein kinase activity; protein serine/threonine kinase activity; protein tyrosine kinase activity; ATP binding; kinase activity; transferase activity; tau protein binding; tau-protein kinase activity; protein serine kinase activity
Glns-ps1	31.3209	-0.382419	0.174765	-2.18818	0.0286563	0.195926	glutamine synthetase pseudogene 1	ENSMUSG00000082100.1	14646	ENSMUSG00000082100
Gm20633	14.6438	-0.38233	0.171302	-2.23191	0.0256212	0.183116		ENSMUSG00000093553.1		ENSMUSG00000093553
RP23-248P8.2	13.7177	-0.382244	0.161814	-2.36225	0.0181646	0.150148		ENSMUSG00000109866.1
Gfra1	4320.47	-0.380807	0.0910726	-4.18136	2.89777e-05	0.00225359	glial cell line derived neurotrophic factor family receptor alpha 1	ENSMUSG00000025089.15	14585	ENSMUSG00000025089		kidney development; cell surface receptor protein tyrosine kinase signaling pathway; nervous system development; male gonad development; anatomical structure morphogenesis; cell migration; neuron differentiation; neuron projection development; glial cell-derived neurotrophic factor receptor signaling pathway; neurotrophin signaling pathway	extracellular space; endosome; multivesicular body; Golgi apparatus; plasma membrane; external side of plasma membrane; membrane; extrinsic component of membrane; axon; neuronal cell body; receptor complex; side of membrane; plasma membrane protein complex	neurotrophin receptor activity; integrin binding; protein binding; glial cell-derived neurotrophic factor receptor activity; signaling receptor activity
Gm45148	18.8586	-0.378811	0.128271	-2.9532	0.00314498	0.0523185		ENSMUSG00000109165.1		ENSMUSG00000109165
Amica1	18.5458	-0.378781	0.1603	-2.36295	0.0181301	0.150148		ENSMUSG00000048534.6
Prok1	90.4651	-0.378214	0.148454	-2.54769	0.0108437	0.111309	prokineticin 1	ENSMUSG00000070368.9	246691	ENSMUSG00000070368		angiogenesis; endothelial cell proliferation; signal transduction; circadian rhythm; positive regulation of MAPK cascade; regulation of angiogenesis; positive regulation of cell division; positive regulation of vascular endothelial cell proliferation	extracellular region	G protein-coupled receptor binding; growth factor activity
Wdr86	15.5117	-0.378084	0.150938	-2.5049	0.0122486	0.117834	WD repeat domain 86	ENSMUSG00000055235.11	269633	ENSMUSG00000055235		biological_process	cellular_component	molecular_function
Tctn2	56.7255	-0.378063	0.100325	-3.76837	0.000164315	0.00714032	tectonic family member 2	ENSMUSG00000029386.15	67978	ENSMUSG00000118662		smoothened signaling pathway; cell projection organization; cilium assembly; protein localization to ciliary transition zone	cytoplasm; cytoskeleton; membrane; ciliary transition zone; MKS complex; cell projection	protein binding
Anxa8	24.5108	-0.377536	0.274208	-1.37682	0.168568	0.488343	annexin A8	ENSMUSG00000021950.15	11752	ENSMUSG00000021950		endosome organization; blood coagulation; hemostasis; endosomal transport	cytoplasm; cytosol; plasma membrane; vesicle membrane; late endosome membrane; sarcolemma	phosphatidylserine binding; calcium ion binding; calcium-dependent phospholipid binding; phosphatidylinositol-4,5-bisphosphate binding; phosphatidylinositol-3,4,5-trisphosphate binding; phospholipase A2 inhibitor activity; phosphatidylinositol-3,4-bisphosphate binding; metal ion binding; actin filament binding
Oat	25111.1	-0.377101	0.094885	-3.9743	7.05875e-05	0.00410741	ornithine aminotransferase	ENSMUSG00000030934.9	18242	ENSMUSG00000030934	Arginine and proline metabolism; Metabolic pathways	L-arginine catabolic process to proline via ornithine; L-arginine catabolic process to L-glutamate; L-proline biosynthetic process	nucleoplasm; cytoplasm; mitochondrion; mitochondrial matrix	ornithine aminotransferase activity; transaminase activity; transferase activity; pyridoxal phosphate binding; identical protein binding
Gm16675	30.6056	-0.376498	0.115582	-3.25742	0.0011243	0.0262363	predicted gene, 16675	ENSMUSG00000097534.3	100503498	ENSMUSG00000097534
Fbxo40	44.1084	-0.376221	0.190565	-1.97424	0.0483542	0.259638	F-box protein 40	ENSMUSG00000047746.14	207215	ENSMUSG00000047746		biological_process; muscle cell differentiation	cytoplasm	molecular_function; zinc ion binding; metal ion binding; ubiquitin protein ligase activity
Cyb561	156.128	-0.375572	0.0835455	-4.49542	6.94329e-06	0.000858119	cytochrome b-561	ENSMUSG00000019590.16	13056	ENSMUSG00000019590		intracellular iron ion homeostasis; ascorbate homeostasis	lysosomal membrane; membrane; cytoplasmic vesicle; chromaffin granule membrane	oxidoreductase activity; metal ion binding; transmembrane monodehydroascorbate reductase activity
Mup13	18.0092	-0.375042	0.278523	-1.34654	0.178129	0.498775	major urinary protein 13	ENSMUSG00000089873.8	100039089	ENSMUSG00000089873		biological_process	extracellular region; extracellular space	molecular_function; odorant binding; pheromone binding; small molecule binding
1810046K07Rik	70.7447	-0.374636	0.219056	-1.71023	0.087223	0.349113		ENSMUSG00000036027.11
Zc3h12d	104.827	-0.373656	0.113306	-3.29775	0.000974619	0.0234289	zinc finger CCCH type containing 12D	ENSMUSG00000039981.5	237256	ENSMUSG00000039981		mRNA catabolic process; negative regulation of cell growth; negative regulation of T cell proliferation; 3'-UTR-mediated mRNA destabilization; negative regulation of G1/S transition of mitotic cell cycle	P-body; nucleus; nucleoplasm; cytoplasm; cytoplasmic ribonucleoprotein granule	mRNA binding; nuclease activity; endonuclease activity; RNA endonuclease activity; zinc ion binding; hydrolase activity; metal ion binding
Tctex1d2	34.2018	-0.37332	0.09549	-3.90952	9.24801e-05	0.0047137		ENSMUSG00000014075.15
Myh10	376.468	-0.37329	0.0899128	-4.15169	3.30031e-05	0.00245855	myosin, heavy polypeptide 10, non-muscle	ENSMUSG00000020900.15	77579	ENSMUSG00000020900	Virion - Lassa virus and SFTS virus; Vascular smooth muscle contraction; IgSF CAM signaling; Tight junction; Regulation of actin cytoskeleton; Motor proteins; Cytoskeleton in muscle cells	mitotic cytokinesis; in utero embryonic development; neuron migration; plasma membrane repair; cardiac septum development; exocytosis; substrate-dependent cell migration, cell extension; nuclear migration; cell adhesion; axonogenesis; axon guidance; brain development; heart development; adult heart development; regulation of cell shape; fourth ventricle development; lateral ventricle development;…	stress fiber; cytoplasm; spindle; cytosol; brush border; cell cortex; cytoplasmic side of plasma membrane; cell surface; myosin complex; myosin II complex; sarcoplasm; lamellipodium; axon; growth cone; midbody; neuromuscular junction; cleavage furrow; myosin filament; actomyosin; cell projection; neuron projection; neuronal cell body; dendritic spine; myosin II filament; postsynapse; postsynaptic…	microfilament motor activity; nucleotide binding; virus receptor activity; cytoskeletal motor activity; actin binding; protein binding; calmodulin binding; ATP binding; RNA stem-loop binding; identical protein binding; ADP binding; mRNA 5'-UTR binding; actin filament binding
Cyp4a31	300.707	-0.372526	0.300553	-1.23947	0.215172	0.546417	cytochrome P450, family 4, subfamily a, polypeptide 31	ENSMUSG00000028712.12	666168	ENSMUSG00000028712	Fatty acid degradation; Arachidonic acid metabolism; Retinol metabolism; Metabolic pathways; PPAR signaling pathway; Vascular smooth muscle contraction; Inflammatory mediator regulation of TRP channels	kidney development; fatty acid metabolic process; arachidonate metabolic process; linoleic acid metabolic process; icosanoid biosynthetic process; lauric acid metabolic process	extracellular space; cytoplasm; endoplasmic reticulum; endoplasmic reticulum membrane; membrane; apical plasma membrane; intracellular membrane-bounded organelle	monooxygenase activity; iron ion binding; arachidonate monooxygenase activity; arachidonate epoxygenase activity; oxidoreductase activity; oxidoreductase activity, acting on paired donors, with incorporation or reduction of molecular oxygen; alkane 1-monooxygenase activity; heme binding; metal ion binding; leukotriene-B4 20-monooxygenase activity; long-chain fatty acid omega-hydroxylase activity;…
Smpdl3b	18.148	-0.372521	0.165107	-2.25624	0.0240558	0.176774	sphingomyelin phosphodiesterase, acid-like 3B	ENSMUSG00000028885.8	100340	ENSMUSG00000028885		immune system process; lipid metabolic process; sphingomyelin catabolic process; inflammatory response; lipid catabolic process; negative regulation of toll-like receptor signaling pathway; innate immune response; negative regulation of innate immune response; membrane lipid catabolic process; negative regulation of inflammatory response	extracellular region; extracellular space; plasma membrane; membrane; side of membrane	sphingomyelin phosphodiesterase activity; protein binding; phosphoric diester hydrolase activity; zinc ion binding; hydrolase activity; hydrolase activity, acting on glycosyl bonds; metal ion binding
G6pdx	145.775	-0.371901	0.144889	-2.56681	0.0102639	0.107707	glucose-6-phosphate dehydrogenase X-linked	ENSMUSG00000031400.10	14381	ENSMUSG00000031400	Pentose phosphate pathway; Glutathione metabolism; Metabolic pathways; Carbon metabolism; Central carbon metabolism in cancer; Diabetic cardiomyopathy	angiotensin-mediated vasoconstriction involved in regulation of systemic arterial blood pressure; angiotensin-mediated vasodilation involved in regulation of systemic arterial blood pressure; glucose metabolic process; pentose-phosphate shunt; cholesterol biosynthetic process; NADP+ metabolic process; NADPH regeneration; NADP+ biosynthetic process; glutathione metabolic process; response to oxida…	cytoplasm; cytosol; cytoplasmic side of plasma membrane; membrane; centriolar satellite	glucose-6-phosphate dehydrogenase activity; D-glucose binding; oxidoreductase activity; oxidoreductase activity, acting on CH-OH group of donors; carbohydrate binding; identical protein binding; protein homodimerization activity; NADP binding
C4a	2001.62	-0.370569	0.227221	-1.63087	0.102917	0.38093	complement C4A (Rodgers blood group)	ENSMUSG00000015451.16	625018	ENSMUSG00000015451	Complement and coagulation cascades; Alcoholic liver disease; Pertussis; Staphylococcus aureus infection; Coronavirus disease - COVID-19; Systemic lupus erythematosus
Rapgef4os2	46.6841	-0.37048	0.214068	-1.73066	0.0835119	0.342506	Rap guanine nucleotide exchange factor (GEF) 4, opposite strand 2	ENSMUSG00000085001.1	100503680	ENSMUSG00000085001
Dact3	23.1541	-0.36857	0.158566	-2.3244	0.0201038	0.159958	dishevelled-binding antagonist of beta-catenin 3	ENSMUSG00000078794.4	629378	ENSMUSG00000078794		negative regulation of epithelial to mesenchymal transition; Wnt signaling pathway; negative regulation of Wnt signaling pathway; negative regulation of cell growth; negative regulation of canonical Wnt signaling pathway	cytoplasm	protein kinase C binding; protein binding; identical protein binding; protein kinase A binding; delta-catenin binding
Pex26	1453.28	-0.367835	0.0877215	-4.19321	2.75029e-05	0.00218061	peroxisomal biogenesis factor 26	ENSMUSG00000067825.11	74043	ENSMUSG00000067825	Peroxisome	protein transport; protein import into peroxisome matrix; protein import into peroxisome matrix, receptor recycling; protein to membrane docking; protein unfolding; protein import into peroxisome membrane	peroxisome; peroxisomal membrane; membrane	protein-membrane adaptor activity; protein-containing complex binding; ATPase binding
Ace	45.294	-0.367826	0.135556	-2.71346	0.00665855	0.0845043	angiotensin I converting enzyme	ENSMUSG00000020681.14	11421	ENSMUSG00000020681	Renin-angiotensin system; Renin secretion; Chagas disease; Coronavirus disease - COVID-19; Hypertrophic cardiomyopathy; Diabetic cardiomyopathy	kidney development; angiotensin maturation; maintenance of blood vessel diameter homeostasis by renin-angiotensin; neutrophil mediated immunity; regulation of systemic arterial blood pressure by renin-angiotensin; positive regulation of systemic arterial blood pressure; proteolysis; peptide metabolic process; spermatogenesis; regulation of blood pressure; male gonad development; embryo developmen…	extracellular region; extracellular space; cytoplasm; lysosome; endosome; plasma membrane; external side of plasma membrane; basal plasma membrane; membrane; brush border membrane; vesicle; extracellular exosome; sperm midpiece	actin binding; endopeptidase activity; carboxypeptidase activity; metallocarboxypeptidase activity; metalloendopeptidase activity; protein binding; calmodulin binding; peptidase activity; metallopeptidase activity; exopeptidase activity; tripeptidyl-peptidase activity; peptidyl-dipeptidase activity; zinc ion binding; hydrolase activity; chloride ion binding; mitogen-activated protein kinase kinas…
Ppp3cc	72.6797	-0.366056	0.0853205	-4.29036	1.78382e-05	0.00163412	protein phosphatase 3, catalytic subunit, gamma isoform	ENSMUSG00000022092.10	19057	ENSMUSG00000022092	MAPK signaling pathway; Calcium signaling pathway; cGMP-PKG signaling pathway; Oocyte meiosis; Cellular senescence; Wnt signaling pathway; Axon guidance; VEGF signaling pathway; Osteoclast differentiation; C-type lectin receptor signaling pathway; Natural killer cell mediated cytotoxicity; Th1 and Th2 cell differentiation; Th17 cell differentiation; T cell receptor signaling pathway; B cell recep…	penetration of zona pellucida; calcineurin-NFAT signaling cascade; positive regulation of calcineurin-NFAT signaling cascade; calcineurin-mediated signaling; regulation of synaptic vesicle endocytosis; positive regulation of synaptic vesicle endocytosis; positive regulation of calcium ion import across plasma membrane; negative regulation of calcium ion import across plasma membrane	cytoplasm; mitochondrion; cytosol; calcineurin complex; protein serine/threonine phosphatase complex; sperm flagellum; sperm midpiece; sperm mitochondrial sheath; presynapse; glutamatergic synapse; presynaptic cytosol	phosphoprotein phosphatase activity; protein serine/threonine phosphatase activity; calcium-dependent protein serine/threonine phosphatase activity; protein binding; calmodulin binding; hydrolase activity; calmodulin-dependent protein phosphatase activity; metal ion binding
C6	5302.01	-0.365725	0.14393	-2.54098	0.0110541	0.112096	complement component 6	ENSMUSG00000022181.15	12274	ENSMUSG00000022181	Complement and coagulation cascades; Regulation of actin cytoskeleton; Prion disease; Coronavirus disease - COVID-19; Systemic lupus erythematosus	in utero embryonic development; positive regulation of activation of membrane attack complex; immune system process; immune response; complement activation; complement activation, classical pathway; killing of cells of another organism; positive regulation of apoptotic process; innate immune response; positive regulation of angiogenesis; positive regulation of complement activation; positive regu…	extracellular region; membrane attack complex; extracellular space; plasma membrane; membrane; other organism cell membrane; transmembrane transporter complex	metal ion binding
Nipal1	118.395	-0.364648	0.256884	-1.4195	0.155752	0.467706	NIPA-like domain containing 1	ENSMUSG00000067219.9	70701	ENSMUSG00000067219		monoatomic ion transport; magnesium ion transport; magnesium ion transmembrane transport	Golgi membrane; Golgi apparatus; membrane	molecular_function; magnesium ion transmembrane transporter activity
Col20a1	84.5197	-0.364019	0.11673	-3.11848	0.00181788	0.0362453	collagen, type XX, alpha 1	ENSMUSG00000016356.17	73368	ENSMUSG00000016356	Protein digestion and absorption		extracellular region; collagen trimer; extracellular matrix
Enkd1	17.3292	-0.364002	0.147359	-2.47018	0.0135046	0.125151	enkurin domain containing 1	ENSMUSG00000013155.9	102124	ENSMUSG00000013155		establishment of mitotic spindle orientation; biological_process; cell projection organization; motile cilium assembly; non-motile cilium assembly	spindle pole; cytoplasm; centrosome; centriole; spindle; cytoskeleton; microtubule; cytoplasmic microtubule; plasma membrane; cilium; microtubule cytoskeleton; ciliary basal body; cell projection; ciliary base; 9+0 non-motile cilium	molecular_function; protein binding; microtubule binding; alpha-tubulin binding
Gm16576	31.6065	-0.363287	0.143554	-2.53067	0.0113845	0.113798	predicted gene 16576	ENSMUSG00000087543.1	100504191	ENSMUSG00000087543		biological_process	cellular_component	molecular_function
Gm21992	18.1301	-0.360851	0.141452	-2.55105	0.0107398	0.110941	predicted gene 21992	ENSMUSG00000096370.8	102902673	ENSMUSG00000096370
Slc25a30	391.11	-0.360647	0.193497	-1.86384	0.0623448	0.29422	solute carrier family 25, member 30	ENSMUSG00000022003.6	67554	ENSMUSG00000022003		inorganic anion transport; transmembrane transport	mitochondrion; mitochondrial inner membrane; membrane	solute:inorganic anion antiporter activity; transmembrane transporter activity
Gm15674	14.4075	-0.360529	0.18356	-1.96409	0.0495196	0.262228		ENSMUSG00000087691.1
Obox4-ps3	38.5309	-0.359797	0.170299	-2.11274	0.0346229	0.215869	oocyte specific homeobox 4, pseudogene 3	ENSMUSG00000099242.1	106780809	ENSMUSG00000099242
Gm2568	62.1219	-0.358939	0.138634	-2.58911	0.00962254	0.103871	TAR DNA-binding protein 43 pseudogene	ENSMUSG00000084793.1	102632291	ENSMUSG00000084793
Gm11767	11.3201	-0.35837	0.162545	-2.20475	0.0274718	0.190556	predicted gene 11767	ENSMUSG00000085207.1	102640451	ENSMUSG00000085207		biological_process	cellular_component	molecular_function
Acacb	4694.28	-0.358155	0.212527	-1.68523	0.0919449	0.357993	acetyl-Coenzyme A carboxylase beta	ENSMUSG00000042010.16	100705	ENSMUSG00000042010	Fatty acid biosynthesis; Pyruvate metabolism; Propanoate metabolism; Metabolic pathways; AMPK signaling pathway; Insulin signaling pathway; Adipocytokine signaling pathway; Glucagon signaling pathway; Insulin resistance; Alcoholic liver disease	acetyl-CoA metabolic process; pentose-phosphate shunt; purine nucleotide metabolic process; lipid metabolic process; fatty acid metabolic process; fatty acid biosynthetic process; acyl-CoA metabolic process; response to nutrient; response to xenobiotic stimulus; positive regulation of lipid storage; regulation of glucose metabolic process; fatty acid oxidation; response to nutrient levels; negati…	nucleus; mitochondrion; mitochondrial outer membrane; mitochondrial fatty acid beta-oxidation multienzyme complex	nucleotide binding; catalytic activity; acetyl-CoA carboxylase activity; ATP binding; biotin binding; ligase activity; identical protein binding; metal ion binding
Gm16008	27.3229	-0.357216	0.129978	-2.74827	0.00599098	0.0788766	predicted gene 16008	ENSMUSG00000087381.8	100038526	ENSMUSG00000087381
Slc1a2	5654.83	-0.356661	0.0686854	-5.19268	2.07292e-07	4.93065e-05	solute carrier family 1 (glial high affinity glutamate transporter), member 2	ENSMUSG00000005089.15	20511	ENSMUSG00000005089	Neuroactive ligand signaling; Synaptic vesicle cycle; Glutamatergic synapse; Amyotrophic lateral sclerosis; Huntington disease	glutathione biosynthetic process; amino acid transport; nervous system development; visual behavior; response to xenobiotic stimulus; response to light stimulus; response to wounding; neutral amino acid transport; L-glutamate transmembrane transport; telencephalon development; adult behavior; multicellular organism growth; response to amino acid; positive regulation of D-glucose import; protein h…	plasma membrane; cell surface; membrane; axon; axolemma; vesicle; presynaptic membrane; dendritic spine; dendritic shaft; cell body; neuron projection terminus; membrane raft; synapse; astrocyte projection; membrane protein complex; glutamatergic synapse	L-glutamate transmembrane transporter activity; high-affinity L-glutamate transmembrane transporter activity; monoatomic anion transmembrane transporter activity; neutral L-amino acid transmembrane transporter activity; symporter activity; glutamate:sodium symporter activity; cysteine transmembrane transporter activity; metal ion binding
Blm	445.472	-0.356384	0.169654	-2.10065	0.0356714	0.218839	Bloom syndrome, RecQ like helicase	ENSMUSG00000030528.12	12144	ENSMUSG00000030528	Homologous recombination; Fanconi anemia pathway	telomere maintenance; double-strand break repair via homologous recombination; DNA double-strand break processing; DNA replication; DNA repair; DNA recombination; DNA damage response; mitotic G2 DNA damage checkpoint signaling; response to X-ray; replication fork processing; DNA geometric change; positive regulation of immature T cell proliferation in thymus; positive regulation of DNA-templated …	nuclear chromosome; chromosome, telomeric region; lateral element; male germ cell nucleus; nucleus; nucleoplasm; replication fork; chromosome; nucleolus; cytoplasm; cytosol; nuclear matrix; PML body; RecQ family helicase-topoisomerase III complex; protein-containing complex; pronucleus	nucleotide binding; four-way junction DNA binding; Y-form DNA binding; bubble DNA binding; p53 binding; nucleic acid binding; DNA binding; DNA helicase activity; single-stranded DNA binding; helicase activity; protein binding; ATP binding; ATP-dependent activity, acting on DNA; zinc ion binding; four-way junction helicase activity; hydrolase activity; hydrolase activity, acting on acid anhydrides…
Ankrd2	25.2497	-0.356226	0.16133	-2.20806	0.0272403	0.189397	ankyrin repeat domain 2	ENSMUSG00000025172.2	56642	ENSMUSG00000025172	Cytoskeleton in muscle cells	negative regulation of transcription by RNA polymerase II; regulation of cytokine production; regulation of transcription by RNA polymerase II; response to oxidative stress; regulation of gene expression; negative regulation of myotube differentiation; skeletal muscle cell differentiation; response to muscle stretch; negative regulation of myoblast differentiation; regulation of intrinsic apoptot…	euchromatin; nucleus; cytoplasm; cytosol; sarcoplasm; PML body; myofibril; sarcomere; I band	chromatin binding; protein binding; titin binding; protein kinase B binding; RNA polymerase II-specific DNA-binding transcription factor binding
Pde5a	40.8774	-0.356186	0.137514	-2.59019	0.00959236	0.103721	phosphodiesterase 5A, cGMP-specific	ENSMUSG00000053965.10	242202	ENSMUSG00000053965	Purine metabolism; Metabolic pathways; cGMP-PKG signaling pathway	regulation of the force of heart contraction; positive regulation of chronic inflammatory response; signal transduction; short-term memory; regulation of heart contraction; positive regulation of cardiac muscle hypertrophy; regulation of nitric oxide mediated signal transduction; negative regulation of T cell proliferation; positive regulation of apoptotic process; positive regulation of G protei…		nucleotide binding; catalytic activity; cyclic-nucleotide phosphodiesterase activity; 3',5'-cyclic-nucleotide phosphodiesterase activity; 3',5'-cyclic-AMP phosphodiesterase activity; phosphoric diester hydrolase activity; hydrolase activity; cGMP binding; metal ion binding; 3',5'-cyclic-GMP phosphodiesterase activity
mt-Tw	57.5979	-0.355371	0.104286	-3.40766	0.000655216	0.018363	tRNA-Trp	ENSMUSG00000064346.1	17746	ENSMUSG00000064346	Aminoacyl-tRNA biosynthesis
Gm5096	600.434	-0.355104	0.168285	-2.11014	0.0348465	0.216422		ENSMUSG00000069324.5
Fkbp5	2091.78	-0.354953	0.217804	-1.62969	0.103167	0.38144	FK506 binding protein 5	ENSMUSG00000024222.16	14229	ENSMUSG00000024222	Estrogen signaling pathway	protein folding; response to bacterium; response to cocaine; phosphatidylinositol 3-kinase/protein kinase B signal transduction; negative regulation of phosphatidylinositol 3-kinase/protein kinase B signal transduction; response to alcohol	nucleus; nucleoplasm; cytoplasm; cytosol	peptidyl-prolyl cis-trans isomerase activity; protein binding; isomerase activity; protein-macromolecule adaptor activity; heat shock protein binding
Gm44787	41.2571	-0.354507	0.177803	-1.99382	0.0461721	0.253544		ENSMUSG00000108822.1		ENSMUSG00000108822
Phf24	21.6525	-0.354501	0.152975	-2.31739	0.0204827	0.161456	PHD finger protein 24	ENSMUSG00000036062.13	230085	ENSMUSG00000036062		gamma-aminobutyric acid signaling pathway; regulation of G protein-coupled receptor signaling pathway; regulation of synaptic transmission, GABAergic; negative regulation of DNA-templated transcription; detection of mechanical stimulus involved in sensory perception of pain	cellular_component; nucleus; cytoplasm; synaptic vesicle membrane; glutamatergic synapse	transcription corepressor activity; protein binding; zinc ion binding; metal ion binding
Sbsn	24.8262	-0.354076	0.130262	-2.71819	0.00656396	0.0837198	suprabasin	ENSMUSG00000046056.15	282619	ENSMUSG00000046056		biological_process	extracellular region; cytoplasm	molecular_function
Ssc5d	22.8744	-0.353502	0.17198	-2.05548	0.0398325	0.234295	scavenger receptor cysteine rich family, 5 domains	ENSMUSG00000035279.8	269855	ENSMUSG00000035279		immune system process; defense response; vesicle-mediated transport; regulation of interleukin-8 production; negative regulation of interleukin-8 production; detection of bacterial lipoprotein; innate immune response; defense response to Gram-negative bacterium; defense response to Gram-positive bacterium	extracellular region; extracellular space; cytoplasm; membrane; extracellular matrix	fibronectin binding; scavenger receptor activity; protein binding; laminin binding; extracellular matrix binding
Arl13b	149.62	-0.353267	0.0975452	-3.62158	0.000292814	0.0106149	ADP-ribosylation factor-like 13B	ENSMUSG00000022911.10	68146	ENSMUSG00000022911		heart looping; smoothened signaling pathway; determination of left/right symmetry; dorsal/ventral pattern formation; neural tube patterning; interneuron migration from the subpallium to the cortex; formation of radial glial scaffolds; cilium assembly; left/right axis specification; receptor localization to non-motile cilium; non-motile cilium assembly	cytosol; plasma membrane; cilium; axoneme; microtubule cytoskeleton; membrane; motile cilium; ciliary basal body; cell projection; intercellular bridge; ciliary membrane; non-motile cilium	nucleotide binding; GTPase activity; protein binding; GTP binding
Aldh1a3	18.0318	-0.352863	0.164433	-2.14593	0.0318783	0.207508	aldehyde dehydrogenase family 1, subfamily A3	ENSMUSG00000015134.15	56847	ENSMUSG00000015134	Retinol metabolism; Metabolic pathways	optic cup morphogenesis involved in camera-type eye development; retinoic acid biosynthetic process; aldehyde metabolic process; lipid metabolic process; locomotory behavior; nucleus accumbens development; embryonic camera-type eye development; inner ear morphogenesis; retinol metabolic process; retinoic acid metabolic process; retinal metabolic process; positive regulation of apoptotic process; …	cytoplasm	retinal dehydrogenase (NAD+) activity; 3-chloroallyl aldehyde dehydrogenase activity; aldehyde dehydrogenase (NAD+) activity; aldehyde dehydrogenase [NAD(P)+] activity; oxidoreductase activity; oxidoreductase activity, acting on the aldehyde or oxo group of donors, NAD or NADP as acceptor; protein homodimerization activity; thyroid hormone binding; NAD+ binding
Fxyd6	15.1876	-0.352817	0.181055	-1.94867	0.0513345	0.267381	FXYD domain-containing ion transport regulator 6	ENSMUSG00000066705.6	59095	ENSMUSG00000066705		monoatomic ion transport; potassium ion transport; sodium ion transport; regulation of monoatomic ion transport; positive regulation of sodium ion export across plasma membrane	plasma membrane; membrane; presynaptic membrane; postsynaptic membrane; glutamatergic synapse	sodium channel regulator activity; ion channel regulator activity
Cyp2c29	66933.9	-0.35249	0.131877	-2.67286	0.00752071	0.0912854	cytochrome P450, family 2, subfamily c, polypeptide 29	ENSMUSG00000003053.17	13095	ENSMUSG00000003053	Steroid hormone biosynthesis; Arachidonic acid metabolism; Linoleic acid metabolism; Retinol metabolism; Metabolic pathways; Serotonergic synapse; Inflammatory mediator regulation of TRP channels; Chemical carcinogenesis - DNA adducts	lipid metabolic process; arachidonate metabolic process; epoxygenase P450 pathway; xenobiotic catabolic process	cytoplasm; endoplasmic reticulum; endoplasmic reticulum membrane; plasma membrane; membrane; intracellular membrane-bounded organelle	monooxygenase activity; iron ion binding; arachidonate monooxygenase activity; arachidonate epoxygenase activity; steroid hydroxylase activity; retinoic acid 4-hydroxylase activity; arachidonate 14,15-epoxygenase activity; oxidoreductase activity; oxidoreductase activity, acting on paired donors, with incorporation or reduction of molecular oxygen; oxidoreductase activity, acting on paired donors…
Hgf	93.0974	-0.352466	0.132633	-2.65745	0.00787351	0.0939692	hepatocyte growth factor	ENSMUSG00000028864.7	15234	ENSMUSG00000028864	EGFR tyrosine kinase inhibitor resistance; MAPK signaling pathway; Ras signaling pathway; Rap1 signaling pathway; Calcium signaling pathway; PI3K-Akt signaling pathway; Focal adhesion; Malaria; Pathways in cancer; Proteoglycans in cancer; Chemical carcinogenesis - reactive oxygen species; Renal cell carcinoma; Melanoma; Non-small cell lung cancer; Hepatocellular carcinoma; Gastric cancer	cell morphogenesis; liver development; proteolysis; signal transduction; skeletal muscle cell proliferation; regulation of anatomical structure morphogenesis; positive regulation of cell migration; positive regulation of myelination; negative regulation of interleukin-6 production; positive regulation of interleukin-10 production; cellular response to hepatocyte growth factor stimulus; negative r…	extracellular region; extracellular space	signaling receptor binding; protein binding; growth factor activity; chemoattractant activity; identical protein binding; protein-containing complex binding
Tmem71	36.6224	-0.349561	0.142355	-2.45556	0.0140664	0.128609	transmembrane protein 71	ENSMUSG00000036944.5	213068	ENSMUSG00000036944		biological_process	mitochondrion; membrane	molecular_function
4933431G14Rik	18.4508	-0.348961	0.278091	-1.25485	0.209534	0.539166	RIKEN cDNA 4933431G14 gene	ENSMUSG00000108709.1	71265	ENSMUSG00000108709
Bhmt	58843.1	-0.348698	0.151683	-2.29886	0.021513	0.166385	betaine-homocysteine methyltransferase	ENSMUSG00000074768.5	12116	ENSMUSG00000074768	Glycine, serine and threonine metabolism; Cysteine and methionine metabolism; One carbon pool by folate; Metabolic pathways; Folate transport and metabolism	amino-acid betaine metabolic process; amino-acid betaine catabolic process; methionine biosynthetic process; methylation; L-methionine salvage	extracellular space; nucleus; cytoplasm; cytosol; protein-containing complex; extracellular exosome	methyltransferase activity; zinc ion binding; transferase activity; identical protein binding; protein-containing complex binding; metal ion binding; betaine-homocysteine S-methyltransferase activity
Gpc3	50.3347	-0.348665	0.274506	-1.27015	0.20403	0.532712	glypican 3	ENSMUSG00000055653.13	14734	ENSMUSG00000055653	Proteoglycans in cancer	branching involved in ureteric bud morphogenesis; kidney development; negative regulation of cell population proliferation; response to bacterium; animal organ morphogenesis; anterior/posterior axis specification; regulation of signal transduction; body morphogenesis; cell migration; bone mineralization; osteoclast differentiation; lung development; positive regulation of BMP signaling pathway; e…	lysosome; Golgi lumen; plasma membrane; cell surface; membrane; side of membrane	protein binding; peptidase inhibitor activity; peptidyl-dipeptidase inhibitor activity
6430571L13Rik	32.7969	-0.348648	0.132105	-2.63918	0.00831074	0.0971397	RIKEN cDNA 6430571L13 gene	ENSMUSG00000037977.6	235599	ENSMUSG00000037977		biological_process	cellular_component; membrane	molecular_function
Bmyc	50.8734	-0.348519	0.137857	-2.52813	0.0114672	0.113982	brain expressed myelocytomatosis oncogene	ENSMUSG00000049086.8	107771	ENSMUSG00000049086		regulation of DNA-templated transcription	nucleus; spindle	DNA-binding transcription factor activity; protein binding; molecular adaptor activity
B430119L08Rik	690.319	-0.348408	0.169064	-2.0608	0.0393217	0.231995	RIKEN cDNA B430119L08 gene	ENSMUSG00000086432.1	319323	ENSMUSG00000086432
Gtpbp4-ps1	66.4742	-0.347567	0.311299	-1.1165	0.264206	0.597217		ENSMUSG00000098330.1		ENSMUSG00000098330
B430219N15Rik	36.1141	-0.346565	0.26287	-1.31839	0.187374	0.511184		ENSMUSG00000085211.2		ENSMUSG00000085211
P2ry1	275.223	-0.346509	0.108456	-3.19492	0.00139869	0.0302931	purinergic receptor P2Y, G-protein coupled 1	ENSMUSG00000027765.6	18441	ENSMUSG00000027765	Rap1 signaling pathway; Neuroactive ligand-receptor interaction; Neuroactive ligand signaling; Platelet activation; Taste transduction	G protein-coupled adenosine receptor signaling pathway; signal transduction; G protein-coupled receptor signaling pathway; adenylate cyclase-inhibiting G protein-coupled receptor signaling pathway; phospholipase C-activating G protein-coupled receptor signaling pathway; positive regulation of cytosolic calcium ion concentration; glial cell migration; regulation of cell shape; response to mechanic…	plasma membrane; cilium; postsynaptic density; membrane; basolateral plasma membrane; apical plasma membrane; dendrite; cell body; postsynaptic membrane; presynaptic active zone membrane; glutamatergic synapse	nucleotide binding; G protein-coupled ADP receptor activity; G protein-coupled receptor activity; ATP binding; signaling receptor regulator activity; A1 adenosine receptor binding; ADP binding; G protein-coupled purinergic nucleotide receptor activity; G protein-coupled ATP receptor activity; protein heterodimerization activity; scaffold protein binding
Gm15663	13.9819	-0.346309	0.158874	-2.17977	0.0292748	0.199051	predicted gene 15663	ENSMUSG00000085282.8	327812	ENSMUSG00000085282
Usp27x	33.4902	-0.346308	0.106254	-3.25925	0.00111709	0.0261129	ubiquitin specific peptidase 27, X chromosome	ENSMUSG00000046269.16	54651	ENSMUSG00000046269		immune system process; proteolysis; protein deubiquitination; positive regulation of apoptotic process; innate immune response; protein stabilization; defense response to virus; positive regulation of type I interferon-mediated signaling pathway; protein K63-linked deubiquitination; protein K48-linked deubiquitination	nucleus; cytoplasm; cytosol	cysteine-type endopeptidase activity; cysteine-type deubiquitinase activity; protein binding; peptidase activity; cysteine-type peptidase activity; hydrolase activity; K63-linked deubiquitinase activity; K48-linked deubiquitinase activity
Prob1	524.986	-0.345408	0.0997197	-3.46379	0.000532621	0.0160117	proline rich basic protein 1	ENSMUSG00000073600.3	381148	ENSMUSG00000073600		biological_process	nucleoplasm	molecular_function
Alas1	29449.6	-0.345177	0.147307	-2.34325	0.0191164	0.154741	aminolevulinic acid synthase 1	ENSMUSG00000032786.14	11655	ENSMUSG00000032786	Glycine, serine and threonine metabolism; Porphyrin metabolism; Metabolic pathways; Biosynthesis of cofactors	response to hypoxia; porphyrin-containing compound metabolic process; protoporphyrinogen IX biosynthetic process; heme biosynthetic process; heme A biosynthetic process; heme B biosynthetic process; response to xenobiotic stimulus; response to herbicide; response to nickel cation; response to nutrient levels; response to cobalt ion; cellular response to insulin stimulus; tetrapyrrole biosynthetic…	nucleoplasm; mitochondrion; mitochondrial inner membrane; mitochondrial matrix; cytosol; membrane	5-aminolevulinate synthase activity; transferase activity; acyltransferase activity; pyridoxal phosphate binding; identical protein binding
Idua	237.315	-0.345083	0.0588621	-5.86257	4.55766e-09	1.93103e-06	iduronidase, alpha-L	ENSMUSG00000033540.18	15932	ENSMUSG00000033540	Glycosaminoglycan degradation; Metabolic pathways; Lysosome	cell morphogenesis; carbohydrate metabolic process; glycosaminoglycan catabolic process; lysosome organization; memory; locomotory behavior; adult walking behavior; adult locomotory behavior; visual learning; extracellular matrix organization; heparan sulfate proteoglycan catabolic process; dermatan sulfate proteoglycan catabolic process; heparin proteoglycan catabolic process; limb morphogenesis…	extracellular space; lysosome; lysosomal lumen	L-iduronidase activity; hydrolase activity, hydrolyzing O-glycosyl compounds; signaling receptor binding; hydrolase activity; hydrolase activity, acting on glycosyl bonds
Ano1	78.861	-0.344831	0.109956	-3.13609	0.00171217	0.0349077	anoctamin 1, calcium activated chloride channel	ENSMUSG00000031075.18	101772	ENSMUSG00000031075		monoatomic ion transport; chloride transport; phospholipase C-activating G protein-coupled receptor signaling pathway; iodide transport; monoatomic ion transmembrane transport; cellular response to heat; regulation of membrane potential; detection of temperature stimulus involved in sensory perception of pain; establishment of localization in cell; trachea development; mucus secretion; protein lo…	nucleoplasm; plasma membrane; external side of plasma membrane; membrane; apical plasma membrane; chloride channel complex; presynaptic membrane; cell projection; synapse; presynapse; glutamatergic synapse	signaling receptor binding; calcium-activated cation channel activity; intracellularly calcium-gated chloride channel activity; voltage-gated chloride channel activity; chloride channel activity; protein binding; iodide transmembrane transporter activity; identical protein binding; protein homodimerization activity; metal ion binding; protein dimerization activity
Cpxm1	41.6137	-0.344099	0.182314	-1.8874	0.0591068	0.286613	carboxypeptidase X, M14 family member 1	ENSMUSG00000027408.7	56264	ENSMUSG00000027408			extracellular region; extracellular space	peptidase activity; metallopeptidase activity; zinc ion binding; hydrolase activity; metal ion binding
Rgs1	24.3573	-0.343958	0.23475	-1.46521	0.142864	0.449431	regulator of G-protein signaling 1	ENSMUSG00000026358.13	50778	ENSMUSG00000026358		signal transduction; G protein-coupled receptor signaling pathway; response to bacterium; negative regulation of signal transduction; positive regulation of GTPase activity; leukotriene signaling pathway	cytoplasm; cytosol; plasma membrane; cytoplasmic side of plasma membrane; membrane	G-protein alpha-subunit binding; GTPase activator activity
Rarres1	1816.24	-0.343672	0.14937	-2.3008	0.021403	0.165968	retinoic acid receptor responder (tazarotene induced) 1	ENSMUSG00000049404.7	109222	ENSMUSG00000049404			extracellular space	metalloendopeptidase inhibitor activity; peptidase inhibitor activity
Plk3	3293.87	-0.34353	0.152409	-2.254	0.024196	0.177174	polo like kinase 3	ENSMUSG00000028680.14	12795	ENSMUSG00000028680	FoxO signaling pathway; C-type lectin receptor signaling pathway; Tuberculosis	G1/S transition of mitotic cell cycle; negative regulation of transcription by RNA polymerase II; response to reactive oxygen species; apoptotic process; response to osmotic stress; DNA damage response; mitotic spindle organization; response to radiation; regulation of cell communication; regulation of signaling; cytoplasmic microtubule organization; positive regulation of proteasomal ubiquitin-d…	kinetochore; chromatin; spindle pole; nucleus; nucleolus; cytoplasm; Golgi apparatus; Golgi stack; centrosome; cytoskeleton; dendrite; neuronal cell body	nucleotide binding; p53 binding; protein kinase activity; protein serine/threonine kinase activity; protein binding; ATP binding; kinase activity; transferase activity; protein serine kinase activity
Ppp4r4	237.571	-0.342776	0.109291	-3.13635	0.00171066	0.0349077	protein phosphatase 4, regulatory subunit 4	ENSMUSG00000021209.12	74521	ENSMUSG00000021209		blastocyst hatching	cytoplasm; cytosol; cilium; protein serine/threonine phosphatase complex; ciliary basal body	protein phosphatase inhibitor activity; protein serine/threonine phosphatase inhibitor activity; protein binding; protein phosphatase regulator activity
Stat3	2977.48	-0.342303	0.0950815	-3.60011	0.000318089	0.0110865	signal transducer and activator of transcription 3	ENSMUSG00000004040.16	20848	ENSMUSG00000004040	EGFR tyrosine kinase inhibitor resistance; Chemokine signaling pathway; HIF-1 signaling pathway; FoxO signaling pathway; Hormone signaling; Necroptosis; Signaling pathways regulating pluripotency of stem cells; JAK-STAT signaling pathway; Th17 cell differentiation; Prolactin signaling pathway; Adipocytokine signaling pathway; Insulin resistance; AGE-RAGE signaling pathway in diabetic complication…	temperature homeostasis; response to hypoxia; regulation of cytokine production; response to ischemia; regulation of DNA-templated transcription; regulation of transcription by RNA polymerase II; transcription by RNA polymerase II; protein import into nucleus; defense response; acute-phase response; inflammatory response; signal transduction; transforming growth factor beta receptor signaling pat…	chromatin; nucleus; nucleoplasm; transcription regulator complex; cytoplasm; mitochondrial inner membrane; cytosol; plasma membrane; postsynaptic density; protein-containing complex; RNA polymerase II transcription regulator complex; Schaffer collateral - CA1 synapse; glutamatergic synapse	transcription cis-regulatory region binding; RNA polymerase II cis-regulatory region sequence-specific DNA binding; DNA-binding transcription factor activity, RNA polymerase II-specific; DNA-binding transcription activator activity, RNA polymerase II-specific; DNA binding; DNA-binding transcription factor activity; RNA binding; nuclear receptor activity; signaling receptor binding; protein bindin…
Rasal3	36.07	-0.341021	0.163589	-2.08462	0.0371038	0.22402	RAS protein activator like 3	ENSMUSG00000052142.15	320484	ENSMUSG00000052142	Ras signaling pathway	negative regulation of Ras protein signal transduction; positive regulation of NK T cell proliferation; regulation of intracellular signal transduction	cytoplasm; cell cortex; cytoplasmic side of membrane	GTPase activator activity; protein binding; identical protein binding
Bhmt-ps1	121.184	-0.340189	0.322085	-1.05621	0.290872	0.621329	betaine-homocysteine methyltransferase, pseudogene 1	ENSMUSG00000096105.1	57421	ENSMUSG00000096105
Lrrc1	18.1399	-0.339732	0.146287	-2.32237	0.0202128	0.160448	leucine rich repeat containing 1	ENSMUSG00000032352.15	214345	ENSMUSG00000032352			cytoplasm; cytosol; membrane
Sema6b	195.941	-0.339326	0.0968129	-3.50497	0.000456666	0.014299	sema domain, transmembrane domain (TM), and cytoplasmic domain, (semaphorin) 6B	ENSMUSG00000001227.11	20359	ENSMUSG00000001227	Axon guidance	neural crest cell migration; nervous system development; axon guidance; central nervous system development; hippocampus development; cell differentiation; positive regulation of cell migration; negative chemotaxis; semaphorin-plexin signaling pathway	plasma membrane; membrane	semaphorin receptor binding; chemorepellent activity
4930452B06Rik	26.1814	-0.338789	0.202174	-1.67572	0.0937921	0.362263		ENSMUSG00000021747.11
Litaf	1954.42	-0.338643	0.0974562	-3.47482	0.000511191	0.0156097	LPS-induced TN factor	ENSMUSG00000022500.14	56722	ENSMUSG00000022500	Lysosome	regulation of cytokine production; regulation of macrophage cytokine production; response to lipopolysaccharide; positive regulation of canonical NF-kappaB signal transduction; positive regulation of transcription by RNA polymerase II; cellular response to lipopolysaccharide; negative regulation of non-canonical NF-kappaB signal transduction	Golgi membrane; nucleus; nucleoplasm; cytoplasm; lysosome; lysosomal membrane; endosome; Golgi apparatus; plasma membrane; cytoplasmic side of plasma membrane; endosome membrane; membrane; early endosome membrane; late endosome membrane; cytoplasmic side of early endosome membrane; cytoplasmic side of late endosome membrane; cytoplasmic side of lysosomal membrane	RNA polymerase II cis-regulatory region sequence-specific DNA binding; DNA-binding transcription activator activity, RNA polymerase II-specific; DNA binding; protein binding; zinc ion binding; identical protein binding; metal ion binding; WW domain binding
H2-Q2	11.4006	-0.337701	0.221325	-1.52581	0.127056	0.425131	histocompatibility 2, Q region locus 2	ENSMUSG00000091705.8	15013	ENSMUSG00000091705	Endocytosis; Phagosome; Cellular senescence; Cell adhesion molecules; Antigen processing and presentation; Type I diabetes mellitus; Human cytomegalovirus infection; Human papillomavirus infection; Human T-cell leukemia virus 1 infection; Kaposi sarcoma-associated herpesvirus infection; Herpes simplex virus 1 infection; Epstein-Barr virus infection; Human immunodeficiency virus 1 infection; Viral…	positive regulation of T cell mediated cytotoxicity; immune system process; antigen processing and presentation of peptide antigen via MHC class I; antigen processing and presentation of endogenous peptide antigen via MHC class Ib; antigen processing and presentation of endogenous peptide antigen via MHC class I via ER pathway, TAP-independent; immune response; female pregnancy; antigen processin…	Golgi membrane; extracellular space; lysosomal membrane; early endosome; endoplasmic reticulum; Golgi apparatus; Golgi medial cisterna; plasma membrane; external side of plasma membrane; cell surface; membrane; phagocytic vesicle membrane; early endosome membrane; MHC class Ib protein complex; cis-Golgi network membrane; MHC class I protein complex; MHC class I peptide loading complex; endoplasmi…	signaling receptor binding; beta-2-microglobulin binding; peptide binding; MHC class I protein binding; peptide antigen binding; T cell receptor binding; CD8 receptor binding; identical protein binding; protein homodimerization activity; protein-containing complex binding; natural killer cell lectin-like receptor binding; TAP binding; TAP1 binding; TAP2 binding; receptor ligand activity; protein-…
Gm22235	25.8746	-0.337592	0.159065	-2.12236	0.0338076	0.21359		ENSMUSG00000087710.1
Gm17300	17.1104	-0.335865	0.224023	-1.49925	0.13381	0.436679		ENSMUSG00000091021.1		ENSMUSG00000091021
Cobl	533.523	-0.335698	0.0951473	-3.52819	0.000418404	0.0134107	cordon-bleu WH2 repeat	ENSMUSG00000020173.17	12808	ENSMUSG00000020173		embryonic axis specification; somite specification; neural tube closure; liver development; actin cytoskeleton organization; actin filament polymerization; notochord development; floor plate development; digestive tract development; collateral sprouting in absence of injury; actin filament network formation; actin crosslink formation; positive regulation of dendrite development; positive regulati…	ruffle; cytoplasm; cytoskeleton; actin filament; plasma membrane; cell cortex; membrane; axon; dendrite; cell projection; neuronal cell body; dendritic growth cone; axonal growth cone; perinuclear region of cytoplasm; terminal web	actin binding; actin monomer binding; protein binding
Gm26698	11.5537	-0.334816	0.176259	-1.89957	0.0574898	0.282921	predicted gene, 26698	ENSMUSG00000097208.1	102635544	ENSMUSG00000120265
Bbs9	105.029	-0.334309	0.0926894	-3.60676	0.000310042	0.0109183	Bardet-Biedl syndrome 9	ENSMUSG00000035919.16	319845	ENSMUSG00000035919		protein transport; cell projection organization; fat cell differentiation; cilium assembly; protein localization to cilium	pericentriolar material; nucleoplasm; cytoplasm; cytosol; cytoskeleton; plasma membrane; cilium; membrane; centriolar satellite; BBSome; ciliary transition zone; ciliary basal body; cell projection; ciliary membrane	protein binding
Lmod2	23.9044	-0.333501	0.276302	-1.20701	0.227426	0.559406	leiomodin 2 (cardiac)	ENSMUSG00000029683.7	93677	ENSMUSG00000029683	Cytoskeleton in muscle cells	muscle contraction; actin filament organization; actin filament polymerization; myofibril assembly; positive regulation of actin filament polymerization; actin nucleation; sarcomere organization; pointed-end actin filament capping	cytoplasm; cytoskeleton; striated muscle thin filament; actin filament; myofibril; sarcomere; M band; cardiac myofibril	actin binding; actin monomer binding; protein binding; tropomyosin binding
Grm8	30.649	-0.333151	0.217471	-1.53194	0.125538	0.422994	glutamate receptor, metabotropic 8	ENSMUSG00000024211.15	14823	ENSMUSG00000024211	Phospholipase D signaling pathway; Neuroactive ligand-receptor interaction; Neuroactive ligand signaling; Glutamatergic synapse	cell communication; signal transduction; G protein-coupled receptor signaling pathway; adenylate cyclase-inhibiting G protein-coupled receptor signaling pathway; adenylate cyclase-inhibiting G protein-coupled glutamate receptor signaling pathway; G protein-coupled glutamate receptor signaling pathway; chemical synaptic transmission; signaling; synaptic transmission, glutamatergic; regulation of n…	plasma membrane; membrane; presynaptic membrane; neuronal cell body; synapse; presynaptic active zone membrane; glutamatergic synapse; GABA-ergic synapse	group III metabotropic glutamate receptor activity; G protein-coupled receptor activity; glutamate receptor activity
B4galt1	1455.61	-0.332914	0.0830803	-4.00714	6.14589e-05	0.0038132	UDP-Gal:betaGlcNAc beta 1,4- galactosyltransferase, polypeptide 1	ENSMUSG00000028413.13	14595	ENSMUSG00000028413	Galactose metabolism; N-Glycan biosynthesis; Various types of N-glycan biosynthesis; Other types of O-glycan biosynthesis; Mannose type O-glycan biosynthesis; Glycosaminoglycan biosynthesis - keratan sulfate; Glycosphingolipid biosynthesis - lacto and neolacto series; Metabolic pathways	epithelial cell development; acute inflammatory response; carbohydrate metabolic process; lactose biosynthetic process; galactose metabolic process; protein glycosylation; protein N-linked glycosylation; lipid metabolic process; cell adhesion; cell-matrix adhesion; binding of sperm to zona pellucida; penetration of zona pellucida; negative regulation of cell population proliferation; glycoprotein…	Golgi trans cisterna; extracellular region; Golgi apparatus; plasma membrane; external side of plasma membrane; cell surface; membrane; basolateral plasma membrane; desmosome; filopodium; brush border membrane; Golgi cisterna membrane; protein-containing complex; cell projection	beta-N-acetylglucosaminylglycopeptide beta-1,4-galactosyltransferase activity; N-acetyllactosamine synthase activity; lactose synthase activity; protein binding; cytoskeletal protein binding; galactosyltransferase activity; transferase activity; glycosyltransferase activity; manganese ion binding; UDP-galactosyltransferase activity; identical protein binding; alpha-tubulin binding; metal ion bind…
Gm17275	18.0134	-0.332064	0.132315	-2.50965	0.0120851	0.11712	predicted gene, 17275	ENSMUSG00000097347.1	100504581
Atp6v0e2	20.0629	-0.3318	0.143108	-2.31852	0.0204209	0.161156	ATPase, H+ transporting, lysosomal V0 subunit E2	ENSMUSG00000039347.7	76252	ENSMUSG00000039347	Oxidative phosphorylation; Metabolic pathways; Phagosome; Synaptic vesicle cycle; Collecting duct acid secretion; Human papillomavirus infection; Rheumatoid arthritis	monoatomic ion transport; transmembrane transport; synaptic vesicle lumen acidification; proton transmembrane transport	vacuolar proton-transporting V-type ATPase, V0 domain; membrane; clathrin-coated vesicle membrane; synaptic vesicle membrane; cytoplasmic vesicle; proton-transporting V-type ATPase, V0 domain; synapse	proton-transporting ATPase activity, rotational mechanism
Pla2g6	2833.59	0.274284	0.0784382	3.49681	0.00047085	0.0146417	phospholipase A2, group VI	ENSMUSG00000042632.16	53357	ENSMUSG00000042632	Glycerophospholipid metabolism; Ether lipid metabolism; Arachidonic acid metabolism; Linoleic acid metabolism; alpha-Linolenic acid metabolism; Metabolic pathways; Ras signaling pathway; Efferocytosis; Vascular smooth muscle contraction; Fc gamma R-mediated phagocytosis; Inflammatory mediator regulation of TRP channels	lipid metabolic process; chemotaxis; positive regulation of cytosolic calcium ion concentration; memory; urinary bladder smooth muscle contraction; antibacterial humoral response; phosphatidylcholine catabolic process; response to endoplasmic reticulum stress; positive regulation of insulin secretion involved in cellular response to glucose stimulus; cardiolipin acyl-chain remodeling; vasodilatio…	extracellular space; cytoplasm; mitochondrion; plasma membrane; microtubule cytoskeleton; membrane; nuclear speck; pseudopodium; cell projection	1-alkyl-2-acetylglycerophosphocholine esterase activity; phosphatidylcholine lysophospholipase activity; phospholipase A2 activity; calmodulin binding; hydrolase activity; serine hydrolase activity; protein kinase binding; identical protein binding; ATP-dependent protein binding; calcium-independent phospholipase A2 activity; long-chain fatty acyl-CoA hydrolase activity
Stox2	28.5518	-0.330886	0.11548	-2.86529	0.00416622	0.0632416	storkhead box 2	ENSMUSG00000038143.15	71069	ENSMUSG00000038143		maternal placenta development; regulation of transcription by RNA polymerase II; response to bacterium; embryo development ending in birth or egg hatching	nucleus; cytoplasm	RNA polymerase II transcription regulatory region sequence-specific DNA binding
Gm30238	24.3566	-0.330438	0.135253	-2.4431	0.0145615	0.131529	predicted gene, 30238	ENSMUSG00000103898.1	102632066	ENSMUSG00000103898
Gm9826	201.68	-0.330409	0.120588	-2.73998	0.00614434	0.0805657	adenosylhomocysteinase pseudogene	ENSMUSG00000048538.7	545302	ENSMUSG00000048538
Ccno	22.7974	-0.329906	0.184838	-1.78484	0.0742875	0.321786	cyclin O	ENSMUSG00000042417.4	218630	ENSMUSG00000042417		G1/S transition of mitotic cell cycle; mitotic cell cycle; spermatogenesis; single fertilization; cell projection organization; cell division; cilium assembly; seminiferous tubule development; multi-ciliated epithelial cell differentiation	cyclin-dependent protein kinase holoenzyme complex; nucleus; nucleolus; cytoplasm; microtubule organizing center; centriolar satellite	cyclin-dependent protein serine/threonine kinase regulator activity
Teddm2	70.933	-0.328489	0.117853	-2.78729	0.00531511	0.0730251	transmembrane epididymal family member 2	ENSMUSG00000045968.7	240817	ENSMUSG00000045968		biological_process	cellular_component; membrane	molecular_function
C3	198870	-0.326735	0.172441	-1.89476	0.0581242	0.284289	complement component 3	ENSMUSG00000024164.15	12266	ENSMUSG00000024164	Neuroactive ligand-receptor interaction; Phagosome; Complement and coagulation cascades; Neutrophil extracellular trap formation; Alcoholic liver disease; Pertussis; Legionellosis; Leishmaniasis; Chagas disease; Staphylococcus aureus infection; Tuberculosis; Kaposi sarcoma-associated herpesvirus infection; Herpes simplex virus 1 infection; Coronavirus disease - COVID-19; Viral carcinogenesis; Sys…	positive regulation of type IIa hypersensitivity; complement activation, lectin pathway; activation of membrane attack complex; positive regulation of protein phosphorylation; positive regulation of activation of membrane attack complex; immune system process; complement receptor mediated signaling pathway; lipid metabolic process; fatty acid metabolic process; inflammatory response; complement a…	extracellular region; classical-complement-pathway C3/C5 convertase complex; extracellular space; cell surface; protein-containing complex; symbiont cell surface	antigen binding; endopeptidase inhibitor activity; protein binding; chemokine activity; lipid binding; C5L2 anaphylatoxin chemotactic receptor binding; receptor ligand activity
Rasgrf2	12.3739	-0.326735	0.200759	-1.6275	0.103631	0.38256	RAS protein-specific guanine nucleotide-releasing factor 2	ENSMUSG00000021708.16	19418	ENSMUSG00000021708	MAPK signaling pathway; Ras signaling pathway	small GTPase-mediated signal transduction; Ras protein signal transduction; response to endoplasmic reticulum stress; long-term synaptic potentiation; postsynaptic modulation of chemical synaptic transmission	cytoplasm; endoplasmic reticulum; endoplasmic reticulum membrane; plasma membrane; membrane; postsynapse; glutamatergic synapse	guanyl-nucleotide exchange factor activity; calmodulin binding
2310016G11Rik	11.9634	-0.326413	0.157291	-2.07522	0.0379663	0.227764	RIKEN cDNA 2310016G11 gene	ENSMUSG00000070574.2	69578	ENSMUSG00000070574
Spata24	63.0327	-0.326319	0.122604	-2.66156	0.00777788	0.0933942	spermatogenesis associated 24	ENSMUSG00000024352.11	71242	ENSMUSG00000024352		spermatogenesis; biological_process; cell differentiation	male germ cell nucleus; nucleus; nucleoplasm; nucleolus; cytoplasm; cytosol	DNA binding; protein binding; identical protein binding
Klf12	55.1917	-0.326247	0.149471	-2.18269	0.0290588	0.198079	Kruppel-like transcription factor 12	ENSMUSG00000072294.4	16597	ENSMUSG00000072294		negative regulation of transcription by RNA polymerase II; regulation of DNA-templated transcription; regulation of transcription by RNA polymerase II; positive regulation of transcription by RNA polymerase II	nucleus; nucleoplasm; cytosol	RNA polymerase II transcription regulatory region sequence-specific DNA binding; RNA polymerase II cis-regulatory region sequence-specific DNA binding; DNA-binding transcription factor activity, RNA polymerase II-specific; DNA-binding transcription repressor activity, RNA polymerase II-specific; DNA binding; DNA-binding transcription factor activity; protein binding; zinc ion binding; metal ion b…
Fbxo44	98.2891	-0.325694	0.0799105	-4.07573	4.58701e-05	0.00309406	F-box protein 44	ENSMUSG00000029001.15	230903	ENSMUSG00000029001		glycoprotein catabolic process; proteasomal protein catabolic process; SCF-dependent proteasomal ubiquitin-dependent protein catabolic process; ERAD pathway	cytoplasm; SCF ubiquitin ligase complex	protein binding; carbohydrate binding; ubiquitin protein ligase activity
Hcrtr2	20.5571	-0.324897	0.206399	-1.57412	0.115459	0.406068	hypocretin (orexin) receptor 2	ENSMUSG00000032360.16	387285	ENSMUSG00000032360	Neuroactive ligand-receptor interaction; Hormone signaling	signal transduction; G protein-coupled receptor signaling pathway; phospholipase C-activating G protein-coupled receptor signaling pathway; neuropeptide signaling pathway; feeding behavior; regulation of circadian sleep/wake cycle, wakefulness; circadian sleep/wake cycle process; cellular response to hormone stimulus; locomotion; regulation of cytosolic calcium ion concentration	nucleoplasm; plasma membrane; membrane	G protein-coupled receptor activity; protein binding; orexin receptor activity; peptide hormone binding
B630019A10Rik	21.9352	-0.324009	0.131299	-2.46772	0.0135978	0.125414	RIKEN cDNA B630019A10 gene	ENSMUSG00000068463.3	100043541	ENSMUSG00000068463
Mapt	143.441	-0.322891	0.0902775	-3.57665	0.00034803	0.0118557	microtubule-associated protein tau	ENSMUSG00000018411.17	17762	ENSMUSG00000018411	MAPK signaling pathway; Alzheimer disease; Parkinson disease; Pathways of neurodegeneration - multiple diseases	microtubule cytoskeleton organization; neuron migration; DNA damage response; axonogenesis; synapse assembly; response to nutrient; learning or memory; memory; adult walking behavior; axo-dendritic transport; intrinsic apoptotic signaling pathway in response to oxidative stress; response to lead ion; regulation of autophagy; negative regulation of gene expression; negative regulation of mitochond…	extracellular region; nucleus; cytoplasm; cytosol; cytoskeleton; microtubule; plasma membrane; axoneme; cytoplasmic side of plasma membrane; postsynaptic density; microtubule cytoskeleton; membrane; axon; dendrite; growth cone; axolemma; nuclear periphery; cytoplasmic ribonucleoprotein granule; somatodendritic compartment; cell projection; neuron projection; neuronal cell body; axonal growth cone…	DNA binding; enzyme inhibitor activity; protein binding; microtubule binding; tubulin binding; SH3 domain binding; enzyme binding; protein kinase binding; heat shock protein binding; apolipoprotein binding; identical protein binding; protein-containing complex binding; protein-folding chaperone binding; protein phosphatase 2A binding; Hsp90 protein binding; lipoprotein particle binding; microtubu…
Zfp-ps	14.6241	-0.322377	0.236054	-1.36569	0.172035	0.491721		ENSMUSG00000099055.1		ENSMUSG00000099055
Tspan4	1255.8	-0.322119	0.0756302	-4.25913	2.05226e-05	0.00179239	tetraspanin 4	ENSMUSG00000025511.14	64540	ENSMUSG00000025511		regulation of mitochondrial membrane potential; protein-containing complex assembly; mitocytosis	plasma membrane; membrane; vesicle; migrasome	antigen binding; integrin binding; protein binding
Gm14097	340.08	-0.32199	0.124583	-2.58455	0.00975076	0.104672	armadillo repeat containing 1 pseudogene	ENSMUSG00000084839.1	100417166
Plekha4	51.7681	-0.321803	0.12352	-2.60527	0.00918024	0.101301	pleckstrin homology domain containing, family A (phosphoinositide binding specific) member 4	ENSMUSG00000040428.19	69217	ENSMUSG00000040428		positive regulation of canonical Wnt signaling pathway; positive regulation of Wnt signaling pathway, planar cell polarity pathway	cytoplasm; membrane; extrinsic component of cytoplasmic side of plasma membrane	phosphatidylinositol-4,5-bisphosphate binding; lipid binding; phosphatidylinositol-3-phosphate binding; identical protein binding; phosphatidylinositol-3,4-bisphosphate binding; phosphatidylinositol-3,5-bisphosphate binding
5031434O11Rik	14.4458	-0.321727	0.162304	-1.98225	0.0474517	0.257084	RIKEN cDNA 5031434O11 gene	ENSMUSG00000097885.7	100039684	ENSMUSG00000097885
Il13ra1	721.689	-0.321551	0.101089	-3.18088	0.00146831	0.031435	interleukin 13 receptor, alpha 1	ENSMUSG00000017057.9	16164	ENSMUSG00000017057	Cytokine-cytokine receptor interaction; JAK-STAT signaling pathway; Pathways in cancer	positive regulation of immunoglobulin production; cytokine-mediated signaling pathway	external side of plasma membrane; membrane; receptor complex	cytokine receptor activity; interleukin-13 receptor activity; cytokine binding
Acta2	106.084	-0.320582	0.225476	-1.4218	0.155084	0.467706	actin alpha 2, smooth muscle, aorta	ENSMUSG00000035783.8	11475	ENSMUSG00000035783	Vascular smooth muscle contraction; Apelin signaling pathway; Motor proteins; Relaxin signaling pathway	muscle contraction; regulation of blood pressure; response to virus; positive regulation of gene expression; vascular associated smooth muscle contraction; positive regulation of hepatic stellate cell migration; positive regulation of hepatic stellate cell contraction; positive regulation of ERK1 and ERK2 cascade; cellular response to transforming growth factor beta stimulus; juxtaglomerular appa…	stress fiber; basement membrane; cytoplasm; cytoskeleton; actin cytoskeleton; lamellipodium; filopodium; smooth muscle contractile fiber; motile cilium; protein-containing complex; cell body	nucleotide binding; protein binding; ATP binding; hydrolase activity; protein kinase binding
C330013J21Rik	15.213	-0.32043	0.134179	-2.38807	0.0169369	0.143699		ENSMUSG00000074529.10
Tuft1	136.449	-0.320125	0.129722	-2.46777	0.0135958	0.125414	tuftelin 1	ENSMUSG00000005968.14	22156	ENSMUSG00000005968		biomineral tissue development	extracellular region; RNA polymerase II, core complex; cytoplasm; I band	protein binding; structural constituent of skin epidermis
Acmsd	275.161	-0.319758	0.113579	-2.8153	0.0048731	0.0691827	amino carboxymuconate semialdehyde decarboxylase	ENSMUSG00000026348.7	266645	ENSMUSG00000026348	Tryptophan metabolism; Metabolic pathways	L-tryptophan catabolic process; secondary metabolic process; quinolinate metabolic process; negative regulation of quinolinate biosynthetic process	cytoplasm; cytosol	aminocarboxymuconate-semialdehyde decarboxylase activity; zinc ion binding; hydrolase activity; lyase activity; carboxy-lyase activity; metal ion binding
Wt1	21.6283	-0.318784	0.274885	-1.1597	0.246171	0.577837	WT1 transcription factor	ENSMUSG00000016458.13	22431	ENSMUSG00000016458	Transcriptional misregulation in cancer	negative regulation of transcription by RNA polymerase II; vasculogenesis; metanephros development; ureteric bud development; branching involved in ureteric bud morphogenesis; kidney development; mesonephros development; regulation of animal organ formation; regulation of DNA-templated transcription; regulation of transcription by RNA polymerase II; apoptotic process; germ cell development; sperm…	nucleus; nucleoplasm; nucleolus; cytoplasm; cytosol; nuclear speck	transcription cis-regulatory region binding; RNA polymerase II cis-regulatory region sequence-specific DNA binding; DNA-binding transcription factor activity, RNA polymerase II-specific; DNA-binding transcription activator activity, RNA polymerase II-specific; DNA binding; double-stranded DNA binding; DNA-binding transcription factor activity; RNA binding; protein binding; zinc ion binding; doubl…
Slc5a1	41.8453	-0.31855	0.155805	-2.04455	0.0408991	0.237783	solute carrier family 5 (sodium/glucose cotransporter), member 1	ENSMUSG00000011034.6	20537	ENSMUSG00000011034	Carbohydrate digestion and absorption; Bile secretion; Mineral absorption	alpha-glucoside transport; metanephros development; intestinal D-glucose absorption; monoatomic ion transport; sodium ion transport; water transport; carbohydrate utilization; galactose transmembrane transport; transepithelial water transport; renal D-glucose absorption; sodium ion transmembrane transport; intestinal absorption; transmembrane transport; D-glucose import across plasma membrane; so…	early endosome; Golgi apparatus; plasma membrane; brush border; cell-cell junction; membrane; apical plasma membrane; brush border membrane; nuclear membrane; organelle; perinuclear region of cytoplasm	water transmembrane transporter activity; D-glucose:sodium symporter activity; alpha-glucoside transmembrane transporter activity; symporter activity; galactose:sodium symporter activity; transmembrane transporter activity; D-glucose transmembrane transporter activity
Itgb4	29.2216	-0.31829	0.131012	-2.42948	0.0151206	0.135227	integrin beta 4	ENSMUSG00000020758.15	192897	ENSMUSG00000020758	PI3K-Akt signaling pathway; Cornified envelope formation; Focal adhesion; ECM-receptor interaction; Regulation of actin cytoskeleton; Cytoskeleton in muscle cells; Human papillomavirus infection; Hypertrophic cardiomyopathy; Arrhythmogenic right ventricular cardiomyopathy; Dilated cardiomyopathy	autophagy; cell communication; cell adhesion; cell-matrix adhesion; integrin-mediated signaling pathway; response to wounding; cell migration; myelination in peripheral nervous system; hemidesmosome assembly; peripheral nervous system myelin formation; cell adhesion mediated by integrin; nail development; skin morphogenesis; filopodium assembly; mesodermal cell differentiation; cell motility; tro…	basement membrane; nucleolus; plasma membrane; focal adhesion; cell cortex; integrin complex; basal plasma membrane; cell surface; membrane; cell junction; hemidesmosome; cell leading edge; nuclear membrane; receptor complex; postsynaptic membrane; anchoring junction; glutamatergic synapse	G protein-coupled receptor binding; integrin binding; protein binding; insulin-like growth factor I binding; neuregulin binding; metal ion binding
Lpcat4	22.1214	-0.318188	0.122247	-2.60284	0.00924558	0.101781	lysophosphatidylcholine acyltransferase 4	ENSMUSG00000027134.4	99010	ENSMUSG00000027134	Glycerophospholipid metabolism; Ether lipid metabolism; Metabolic pathways	lipid metabolic process; phospholipid metabolic process; phospholipid biosynthetic process; phosphatidylserine acyl-chain remodeling; phosphatidylcholine acyl-chain remodeling; phosphatidylethanolamine acyl-chain remodeling; glycerolipid metabolic process	endoplasmic reticulum; endoplasmic reticulum membrane; membrane	O-acyltransferase activity; transferase activity; acyltransferase activity; lysophosphatidic acid acyltransferase activity; 1-alkenylglycerophosphoethanolamine O-acyltransferase activity; 1-acylglycerophosphocholine O-acyltransferase activity; 1-alkylglycerophosphocholine O-acetyltransferase activity; lysophospholipid acyltransferase activity; 1-acylglycerophosphoethanolamine O-acyltransferase ac…
6330403L08Rik	53.125	-0.317935	0.0949417	-3.34874	0.000811797	0.0208059	RIKEN cDNA 6330403L08 gene	ENSMUSG00000075585.3	70744	ENSMUSG00000075585
2610035D17Rik	16.7974	-0.316439	0.189151	-1.67294	0.0943391	0.363273	RIKEN cDNA 2610035D17 gene	ENSMUSG00000087259.7	72386	ENSMUSG00000087259
Tmprss2	106.557	-0.315814	0.113524	-2.7819	0.00540412	0.0737856	transmembrane protease, serine 2	ENSMUSG00000000385.7	50528	ENSMUSG00000000385	Influenza A; Coronavirus disease - COVID-19; Transcriptional misregulation in cancer; Prostate cancer	proteolysis; protein autoprocessing; positive regulation of viral entry into host cell; entry receptor-mediated virion attachment to host cell	extracellular region; nucleoplasm; plasma membrane; membrane	serine-type endopeptidase activity; peptidase activity; serine-type peptidase activity; hydrolase activity; metal ion binding
Mup18	249.036	-0.315774	0.352355	-0.896179	0.370157	0.688639	major urinary protein 18	ENSMUSG00000078674.2	100048884	ENSMUSG00000078674		biological_process	extracellular region; extracellular space	molecular_function; odorant binding; pheromone binding; small molecule binding
Gas6	1871.84	-0.315036	0.159653	-1.97326	0.0484663	0.259908	growth arrest specific 6	ENSMUSG00000031451.6	14456	ENSMUSG00000031451	EGFR tyrosine kinase inhibitor resistance; Efferocytosis	neuron migration; positive regulation of protein phosphorylation; positive regulation of cytokine-mediated signaling pathway; positive regulation of glomerular filtration; protein phosphorylation; phagocytosis; signal transduction; cell surface receptor signaling pathway; enzyme-linked receptor protein signaling pathway; blood coagulation; cellular response to starvation; positive regulation of g…	extracellular region; extracellular space; cytoplasm	phosphatidylserine binding; signaling receptor binding; calcium ion binding; protein-macromolecule adaptor activity; receptor tyrosine kinase binding; cysteine-type endopeptidase inhibitor activity involved in apoptotic process; metal ion binding; receptor ligand activity
Plcd1	21.3133	-0.314825	0.12296	-2.56039	0.0104555	0.108792	phospholipase C, delta 1	ENSMUSG00000010660.2	18799	ENSMUSG00000010660	Inositol phosphate metabolism; Metabolic pathways; Calcium signaling pathway; Phosphatidylinositol signaling system; Thyroid hormone signaling pathway; AGE-RAGE signaling pathway in diabetic complications	angiogenesis; lipid metabolic process; signal transduction; G protein-coupled receptor signaling pathway; phospholipase C-activating G protein-coupled receptor signaling pathway; positive regulation of norepinephrine secretion; lipid catabolic process; positive regulation of inositol trisphosphate biosynthetic process; intracellular signal transduction; regulation of cell population proliferation…	cytoplasm; cytosol; plasma membrane; mitochondrial membrane	phosphatidylinositol-4,5-bisphosphate phospholipase C activity; phosphatidylinositol-4,5-bisphosphate 5-phosphatase activity; phospholipase C activity; calcium ion binding; protein binding; phospholipid binding; calcium-dependent phospholipid binding; phosphatidylinositol-4,5-bisphosphate binding; phosphoric diester hydrolase activity; hydrolase activity; enzyme binding; GTPase activating protein…
Sgsm1	71.4826	-0.314523	0.156654	-2.00776	0.044669	0.249666	small G protein signaling modulator 1	ENSMUSG00000042216.13	52850	ENSMUSG00000042216		positive regulation of transcription by RNA polymerase II	cytoplasm; Golgi apparatus; cytosol; membrane; cytoplasmic vesicle membrane; cytoplasmic vesicle	GTPase activator activity; protein binding; small GTPase binding
Clmp	30.4686	-0.314371	0.146543	-2.14525	0.0319325	0.207745	CXADR-like membrane protein	ENSMUSG00000032024.10	71566	ENSMUSG00000032024	IgSF CAM signaling	digestive tract development; postsynaptic modulation of chemical synaptic transmission	cytoplasmic microtubule; plasma membrane; bicellular tight junction; membrane; cell junction; postsynaptic membrane; anchoring junction	molecular_function
Muc1	21.9513	-0.314266	0.145405	-2.16131	0.0306714	0.203645	mucin 1, transmembrane	ENSMUSG00000042784.9	17829	ENSMUSG00000042784		negative regulation of transcription by competitive promoter binding; DNA damage response, signal transduction by p53 class mediator; mitotic G1 DNA damage checkpoint signaling; negative regulation of cell adhesion mediated by integrin; positive regulation of transcription by RNA polymerase II; negative regulation of intrinsic apoptotic signaling pathway in response to DNA damage by p53 class med…	chromatin; nucleus; cytoplasm; plasma membrane; cell surface; membrane; apical plasma membrane; extracellular matrix; extracellular exosome	RNA polymerase II cis-regulatory region sequence-specific DNA binding; p53 binding; transcription coregulator activity
Rragd	56.264	-0.314237	0.133436	-2.35496	0.0185245	0.152144	Ras-related GTP binding D	ENSMUSG00000028278.14	52187	ENSMUSG00000028278	Autophagy - animal; mTOR signaling pathway	cellular response to starvation; negative regulation of autophagy; cellular response to amino acid starvation; response to amino acid; cellular response to L-leucine; positive regulation of TORC1 signaling; cellular response to leucine starvation	nucleus; nucleoplasm; cytoplasm; lysosome; lysosomal membrane; centrosome; cytosol; membrane; Gtr1-Gtr2 GTPase complex	nucleotide binding; GTPase activity; GTP binding; hydrolase activity; GDP binding; protein heterodimerization activity; GTPase binding; molecular adaptor activity
Adamtsl1	20.5309	-0.314223	0.166818	-1.88362	0.0596159	0.287996	ADAMTS-like 1	ENSMUSG00000066113.15	77739	ENSMUSG00000066113		extracellular matrix organization	extracellular region; extracellular matrix
RP23-359B23.11	46.5955	-0.314091	0.206443	-1.52144	0.128149	0.426995		ENSMUSG00000110386.1
Slc30a3	17.4291	-0.314054	0.256802	-1.22295	0.22135	0.552894	solute carrier family 30 (zinc transporter), member 3	ENSMUSG00000029151.14	22784	ENSMUSG00000029151		monoatomic ion transport; monoatomic cation transport; zinc ion transport; response to zinc ion; detoxification of zinc ion; positive regulation of transport; transmembrane transport; zinc ion transmembrane transport; zinc ion import into synaptic vesicle; zinc ion import into lysosome	cytoplasm; lysosome; lysosomal membrane; endosome; late endosome; plasma membrane; synaptic vesicle; membrane; synaptic vesicle membrane; cytoplasmic vesicle; late endosome membrane; neuron projection; synapse; hippocampal mossy fiber; hippocampal mossy fiber to CA3 synapse; glutamatergic synapse; microvesicle	zinc ion transmembrane transporter activity; monoatomic cation transmembrane transporter activity; antiporter activity; metal ion binding
Vsig10	43.6368	-0.313708	0.120819	-2.59651	0.00941768	0.102976	V-set and immunoglobulin domain containing 10	ENSMUSG00000066894.14	231668	ENSMUSG00000066894		biological_process	membrane; neuron projection	molecular_function
Neb	345.907	-0.313308	0.12668	-2.47323	0.0133899	0.124543	nebulin	ENSMUSG00000026950.17	17996	ENSMUSG00000026950	Cytoskeleton in muscle cells	regulation of actin filament length; sarcomere organization; cardiac muscle thin filament assembly	cytoplasm; striated muscle thin filament; myofibril; Z disc; protein-containing complex; contractile muscle fiber	actin binding; protein binding; actin filament binding
Mpeg1	1419.34	-0.312631	0.121826	-2.56621	0.0102816	0.10781	macrophage expressed gene 1	ENSMUSG00000046805.9	17476	ENSMUSG00000046805		adaptive immune response; immune system process; dendritic cell antigen processing and presentation; antigen processing and presentation of exogenous peptide antigen; antigen processing and presentation of exogenous peptide antigen via MHC class I, TAP-dependent; antigen processing and presentation of exogenous peptide antigen via MHC class I; defense response to bacterium; innate immune response…	membrane; cytoplasmic vesicle membrane; phagocytic vesicle membrane; cytoplasmic vesicle; endolysosome; phagocytic vesicle; phagolysosome membrane	wide pore channel activity; pore-forming activity
AA986860	80.9028	-0.312286	0.157184	-1.98676	0.0469491	0.255176	expressed sequence AA986860	ENSMUSG00000042510.7	212439	ENSMUSG00000042510		biological_process	cytoplasm; cytosol; plasma membrane	molecular_function
Bco1	201.737	-0.312103	0.086133	-3.6235	0.000290645	0.0105929	beta-carotene oxygenase 1	ENSMUSG00000031845.15	63857	ENSMUSG00000031845	Retinol metabolism; Metabolic pathways; Biosynthesis of cofactors	retinoid metabolic process; lipid metabolic process; carotene catabolic process; retinol metabolic process; retinal metabolic process; beta-carotene metabolic process	cytoplasm; cytosol	beta-carotene 15,15'-dioxygenase activity; carotenoid dioxygenase activity; oxidoreductase activity; oxidoreductase activity, acting on single donors with incorporation of molecular oxygen, incorporation of two atoms of oxygen; metal ion binding; dioxygenase activity
Ctsl	14158.8	-0.312023	0.0761002	-4.10017	4.12855e-05	0.00291536	cathepsin L	ENSMUSG00000021477.8	13039	ENSMUSG00000021477	Autophagy - animal; Lysosome; Phagosome; Apoptosis; Antigen processing and presentation; Proteoglycans in cancer; Rheumatoid arthritis; Fluid shear stress and atherosclerosis	proteolysis; thyroid hormone generation; spermatogenesis; male gonad development; cellular response to starvation; response to glucose; negative regulation of keratinocyte proliferation; protein autoprocessing; nerve development; protein catabolic process; heparan sulfate proteoglycan catabolic process; collagen catabolic process; hair follicle morphogenesis; zymogen activation; enkephalin proces…	extracellular region; extracellular space; nucleus; nucleolus; cytoplasm; lysosome; multivesicular body; Golgi apparatus; plasma membrane; microvillus; external side of plasma membrane; membrane; apical plasma membrane; secretory granule; extracellular matrix; cytoplasmic vesicle; chromaffin granule; perikaryon; apical part of cell	fibronectin binding; endopeptidase activity; aminopeptidase activity; cysteine-type endopeptidase activity; protein binding; collagen binding; peptidase activity; cysteine-type peptidase activity; hydrolase activity; cysteine-type carboxypeptidase activity; kininogen binding; peptide binding; histone binding; proteoglycan binding; protein-containing complex binding; metal ion binding; serpin fami…
Unc5b	335.616	-0.311897	0.124965	-2.49587	0.0125649	0.11952	unc-5 netrin receptor B	ENSMUSG00000020099.7	107449	ENSMUSG00000020099	Axon guidance; IgSF CAM signaling	angiogenesis; apoptotic process; signal transduction; axon guidance; anterior/posterior axon guidance; netrin-activated signaling pathway; negative regulation of neuron apoptotic process; positive regulation of phosphatidylinositol 3-kinase/protein kinase B signal transduction; negative regulation of extrinsic apoptotic signaling pathway in absence of ligand; positive regulation of extrinsic apop…	cytosol; plasma membrane; membrane; membrane raft	netrin receptor activity; protein binding
Fdps	918.918	-0.311889	0.190312	-1.63883	0.101249	0.377687	farnesyl diphosphate synthetase	ENSMUSG00000059743.12	110196	ENSMUSG00000059743	Terpenoid backbone biosynthesis; Metabolic pathways; Influenza A; Human T-cell leukemia virus 1 infection	lipid metabolic process; steroid biosynthetic process; cholesterol biosynthetic process; steroid metabolic process; cholesterol metabolic process; isoprenoid biosynthetic process; sterol biosynthetic process; geranyl diphosphate biosynthetic process; cholesterol biosynthetic process via desmosterol; cholesterol biosynthetic process via lathosterol; zymosterol biosynthetic process; farnesyl diphos…	nucleoplasm; cytoplasm; mitochondrion; mitochondrial matrix; peroxisome; cytosol	dimethylallyltranstransferase activity; (2E,6E)-farnesyl diphosphate synthase activity; prenyltransferase activity; transferase activity; transferase activity, transferring alkyl or aryl (other than methyl) groups; metal ion binding
Cyp1b1	23.9162	-0.31182	0.176163	-1.77007	0.0767157	0.327054	cytochrome P450, family 1, subfamily b, polypeptide 1	ENSMUSG00000024087.3	13078	ENSMUSG00000024087	Steroid hormone biosynthesis; Tryptophan metabolism; Metabolism of xenobiotics by cytochrome P450; Ovarian steroidogenesis; Chemical carcinogenesis - DNA adducts; MicroRNAs in cancer; Chemical carcinogenesis - receptor activation; Chemical carcinogenesis - reactive oxygen species	angiogenesis; trabecular meshwork development; DNA modification; lipid metabolic process; fatty acid metabolic process; steroid catabolic process; xenobiotic metabolic process; nitric oxide biosynthetic process; cell adhesion; steroid metabolic process; estrogen metabolic process; negative regulation of cell population proliferation; intrinsic apoptotic signaling pathway in response to oxidative …	mitochondrion; endoplasmic reticulum; endoplasmic reticulum membrane; membrane	monooxygenase activity; iron ion binding; steroid hydroxylase activity; oxidoreductase activity; oxidoreductase activity, acting on paired donors, with incorporation or reduction of molecular oxygen; oxidoreductase activity, acting on paired donors, with incorporation or reduction of molecular oxygen, reduced flavin or flavoprotein as one donor, and incorporation of one atom of oxygen; lyase acti…
Ncmap	21.6711	-0.31133	0.185783	-1.67577	0.093784	0.362263	noncompact myelin associated protein	ENSMUSG00000043924.16	230822	ENSMUSG00000043924		regulation of myelination; positive regulation of myelination; peripheral nervous system myelin formation	plasma membrane; membrane; paranode region of axon; Schmidt-Lanterman incisure	structural constituent of myelin sheath
Adam23	206.856	-0.309018	0.137277	-2.25105	0.0243821	0.17763	a disintegrin and metallopeptidase domain 23	ENSMUSG00000025964.15	23792	ENSMUSG00000025964		proteolysis; cell adhesion; cellular response to leukemia inhibitory factor	extracellular region; plasma membrane; membrane; presynaptic membrane; glutamatergic synapse	metalloendopeptidase activity; protein binding; metallopeptidase activity
Prom1	18.0587	-0.308667	0.166159	-1.85766	0.0632171	0.2961	prominin 1	ENSMUSG00000029086.15	19126	ENSMUSG00000029086	Transcriptional misregulation in cancer	retina layer formation; photoreceptor cell maintenance; retina morphogenesis in camera-type eye; camera-type eye photoreceptor cell differentiation; podocyte differentiation; glomerular parietal epithelial cell differentiation; positive regulation of nephron tubule epithelial cell differentiation	photoreceptor outer segment; extracellular space; endoplasmic reticulum; endoplasmic reticulum-Golgi intermediate compartment; plasma membrane; microvillus; brush border; cilium; cell surface; membrane; apical plasma membrane; microvillus membrane; stereocilium; photoreceptor outer segment membrane; cell projection; extracellular exosome; prominosome	cholesterol binding; actinin binding; cadherin binding
Gm2788	633.029	-0.308468	0.139867	-2.20544	0.0274233	0.190474	predicted gene 2788	ENSMUSG00000085995.2	108167326	ENSMUSG00000085995
Phf2os1	12.3778	-0.308308	0.151488	-2.0352	0.0418306	0.240675	PHD finger protein 2, opposite strand 1	ENSMUSG00000086889.1	102642832	ENSMUSG00000086889
Gem	49.4626	-0.307755	0.128285	-2.39899	0.0164404	0.141613	GTP binding protein overexpressed in skeletal muscle	ENSMUSG00000028214.13	14579	ENSMUSG00000028214		mitotic cell cycle; chromosome organization; metaphase chromosome alignment	nucleus; plasma membrane; cytoplasmic side of plasma membrane; membrane; midbody; spindle midzone; mitotic spindle	nucleotide binding; magnesium ion binding; GTPase activity; calcium channel regulator activity; protein binding; GTP binding; GDP binding
Sqle	1792.39	-0.307751	0.187255	-1.64348	0.100283	0.375799	squalene epoxidase	ENSMUSG00000022351.14	20775	ENSMUSG00000022351	Steroid biosynthesis; Metabolic pathways	lipid metabolic process; cholesterol biosynthetic process; cholesterol metabolic process; sterol metabolic process; sterol biosynthetic process; cholesterol biosynthetic process via desmosterol; cholesterol biosynthetic process via lathosterol; zymosterol biosynthetic process; regulation of cell population proliferation; lipid droplet formation; response to biphenyl	endoplasmic reticulum; endoplasmic reticulum membrane; membrane; intracellular membrane-bounded organelle; cytoplasmic side of endoplasmic reticulum membrane	squalene monooxygenase activity; oxidoreductase activity; flavin adenine dinucleotide binding; FAD binding
Fmo2	749.584	-0.306761	0.140101	-2.18956	0.028556	0.195438	flavin containing monooxygenase 2	ENSMUSG00000040170.13	55990	ENSMUSG00000040170	Taurine and hypotaurine metabolism; Drug metabolism - cytochrome P450; Metabolic pathways	organic acid metabolic process; NADP+ metabolic process; xenobiotic metabolic process; toxin metabolic process; negative regulation of fatty acid oxidation; oxygen metabolic process; energy homeostasis	endoplasmic reticulum; endoplasmic reticulum membrane; membrane	monooxygenase activity; N,N-dimethylaniline monooxygenase activity; oxidoreductase activity; flavin adenine dinucleotide binding; NADP binding
2200002D01Rik	211.914	-0.306324	0.124056	-2.46925	0.0135397	0.125305	RIKEN cDNA 2200002D01 gene	ENSMUSG00000030587.5	72275	ENSMUSG00000030587		biological_process	nucleus; nucleoplasm; nucleolus; cytosol; plasma membrane	molecular_function
mt-Tm	141.501	-0.305948	0.0847773	-3.60884	0.000307574	0.0108596	tRNA-Met	ENSMUSG00000064344.1	17737	ENSMUSG00000064344	Aminoacyl-tRNA biosynthesis
Trem2	20.4181	-0.305726	0.222761	-1.37244	0.169927	0.489131	triggering receptor expressed on myeloid cells 2	ENSMUSG00000023992.14	83433	ENSMUSG00000023992	Osteoclast differentiation	microglial cell activation; microglial cell activation involved in immune response; T cell activation via T cell receptor contact with antigen bound to MHC molecule on antigen presenting cell; positive regulation of antigen processing and presentation of peptide antigen via MHC class II; negative regulation of inflammatory response to antigenic stimulus; response to ischemia; phagocytosis; phagoc…	extracellular region; plasma membrane; membrane; plasma membrane raft	lipopolysaccharide binding; amyloid-beta binding; phosphatidylserine binding; transmembrane signaling receptor activity; protein binding; phospholipid binding; beta-catenin binding; high-density lipoprotein particle binding; lipid binding; phosphatidylethanolamine binding; semaphorin receptor activity; kinase activator activity; low-density lipoprotein particle binding; semaphorin receptor bindin…
Cadm4	221.291	-0.305318	0.176277	-1.73203	0.0832682	0.341795	cell adhesion molecule 4	ENSMUSG00000054793.8	260299	ENSMUSG00000054793	IgSF CAM signaling	regulation of protein phosphorylation; negative regulation of protein phosphorylation; cell adhesion; homophilic cell adhesion via plasma membrane adhesion molecules; negative regulation of peptidyl-threonine phosphorylation; negative regulation of vascular endothelial growth factor receptor signaling pathway; regulation of Rac protein signal transduction; regulation of cell population proliferat…	membrane; cell leading edge; cell-cell contact zone; synaptic membrane	protein phosphatase binding; receptor tyrosine kinase binding; vascular endothelial growth factor receptor 1 binding; vascular endothelial growth factor receptor 2 binding
Ahnak2	23.7628	-0.305063	0.198215	-1.53905	0.123792	0.420013	AHNAK nucleoprotein 2	ENSMUSG00000072812.4	100041194	ENSMUSG00000118667	Salmonella infection	regulation of RNA splicing	nucleus; cytoplasm; cytosol; plasma membrane; Z disc; cytoplasmic vesicle membrane; costamere	molecular_function
Fam161a	51.1873	-0.304393	0.0848333	-3.58813	0.000333062	0.011461	family with sequence similarity 161, member A	ENSMUSG00000049811.16	73873	ENSMUSG00000049811		cell projection organization; cilium organization; cilium assembly	astral microtubule; photoreceptor inner segment; nucleoplasm; cytoplasm; Golgi apparatus; centrosome; centriole; cytosol; cytoskeleton; spindle microtubule; cilium; photoreceptor connecting cilium; ciliary basal body; cell projection; mitotic spindle; mitotic spindle pole; photoreceptor cell cilium	microtubule binding; identical protein binding
Treh	83.2093	-0.304354	0.177454	-1.71512	0.086324	0.347613	trehalase (brush-border membrane glycoprotein)	ENSMUSG00000032098.13	58866	ENSMUSG00000032098	Starch and sucrose metabolism; Metabolic pathways	carbohydrate metabolic process; trehalose metabolic process; trehalose catabolic process; animal organ morphogenesis	plasma membrane; brush border; membrane; side of membrane	alpha,alpha-trehalase activity; hydrolase activity; hydrolase activity, acting on glycosyl bonds
Gm27252	91.8694	-0.304217	0.143537	-2.11943	0.0340538	0.214414	predicted gene 27252	ENSMUSG00000098708.7	102634962	ENSMUSG00000098708
Gja4	111.975	-0.303132	0.0949388	-3.19292	0.00140843	0.0304553	gap junction protein, alpha 4	ENSMUSG00000050234.7	14612	ENSMUSG00000050234		blood vessel development; calcium ion transport; cell communication; cell-cell signaling; transmembrane transport	plasma membrane; gap junction; connexin complex; membrane; anchoring junction	gap junction channel activity
Plxdc2	23.5594	-0.302787	0.192459	-1.57325	0.115661	0.406351	plexin domain containing 2	ENSMUSG00000026748.13	67448	ENSMUSG00000026748			plasma membrane; membrane; extracellular matrix
Gm28720	34.1782	-0.30219	0.114779	-2.63281	0.00846815	0.0977949		ENSMUSG00000101210.1		ENSMUSG00000101210
Dpep1	26.6045	-0.302027	0.177894	-1.69779	0.0895478	0.353628	dipeptidase 1	ENSMUSG00000019278.4	13479	ENSMUSG00000019278		proteolysis; lipid metabolic process; leukotriene metabolic process; glutathione catabolic process; inflammatory response; antibiotic metabolic process; negative regulation of cell migration; neutrophil chemotaxis; homocysteine metabolic process; cellular response to calcium ion; cellular response to nitric oxide; leukotriene D4 catabolic process	extracellular space; nucleoplasm; plasma membrane; membrane; apical plasma membrane; cell junction; microvillus membrane; cell projection; apical part of cell; side of membrane	peptidase activity; metallopeptidase activity; zinc ion binding; beta-lactamase activity; hydrolase activity; dipeptidase activity; GPI anchor binding; metal ion binding; metallodipeptidase activity; modified amino acid binding
Hhip	50.5511	-0.301844	0.120759	-2.49957	0.0124346	0.119026	Hedgehog-interacting protein	ENSMUSG00000064325.4	15245	ENSMUSG00000064325	cAMP signaling pathway; Hedgehog signaling pathway; Pathways in cancer; Basal cell carcinoma	signal transduction; neuroblast proliferation; animal organ morphogenesis; dorsal/ventral pattern formation; negative regulation of signal transduction; negative regulation of angiogenesis; regulation of fibroblast growth factor receptor signaling pathway; negative regulation of apoptotic process; negative regulation of smoothened signaling pathway; skeletal system morphogenesis; epithelial tube …	extracellular region; plasma membrane; cell surface; membrane	protein binding; zinc ion binding; metal ion binding; hedgehog family protein binding
Tbx3os1	622.066	-0.301769	0.128493	-2.34853	0.0188475	0.153751	T-box 3, opposite strand 1	ENSMUSG00000087516.7	100039542	ENSMUSG00000087516
Afp	54.4437	-0.301716	0.118235	-2.55183	0.010716	0.110822	alpha fetoprotein	ENSMUSG00000054932.6	11576	ENSMUSG00000054932	Hippo signaling pathway	ovulation from ovarian follicle; apoptotic process; immune response; response to nutrient levels; progesterone metabolic process; homeostasis of number of cells	extracellular region; extracellular space; cytoplasm	small molecule binding; metal ion binding
CH25-588N10.2	144.135	-0.300971	0.0732198	-4.11051	3.94786e-05	0.00283234		ENSMUSG00000110277.1
Utp14b	200.841	-0.300922	0.127231	-2.36517	0.018022	0.149628	UTP14B small subunit processome component	ENSMUSG00000079470.8	195434	ENSMUSG00000079470	Ribosome biogenesis in eukaryotes	rRNA processing; spermatogenesis; cell differentiation; ribosome biogenesis; meiotic cell cycle	nucleus; nucleolus; cytosol; small-subunit processome
Fbf1	1267.81	-0.300492	0.17842	-1.68418	0.0921473	0.358078	Fas binding factor 1	ENSMUSG00000020776.18	217335	ENSMUSG00000020776		cell projection organization; apical junction assembly; cilium assembly; establishment of epithelial cell polarity	spindle pole; cytoplasm; centrosome; centriole; cytoskeleton; cilium; ciliary basal body; apical junction complex; keratin filament; anchoring junction; ciliary transition fiber	protein binding
Tmem119	25.0682	-0.300169	0.208047	-1.44279	0.149079	0.458845	transmembrane protein 119	ENSMUSG00000054675.5	231633	ENSMUSG00000054675		ossification; osteoblast differentiation; endochondral ossification; spermatogenesis; positive regulation of gene expression; negative regulation of myotube differentiation; cell differentiation; positive regulation of bone mineralization; BMP signaling pathway; biomineral tissue development; positive regulation of osteoblast proliferation; positive regulation of osteoblast differentiation; negat…	extracellular region; cytoplasm; endoplasmic reticulum; endoplasmic reticulum membrane; plasma membrane; membrane	protein binding
Zfp13	27.3906	-0.300095	0.149911	-2.00182	0.0453037	0.251526	zinc finger protein 13	ENSMUSG00000062012.13	22654	ENSMUSG00000062012		negative regulation of transcription by RNA polymerase II; regulation of DNA-templated transcription; regulation of transcription by RNA polymerase II; positive regulation of hydrogen peroxide biosynthetic process; positive regulation of mitochondrial outer membrane permeabilization involved in apoptotic signaling pathway	nucleus; mitochondrion	RNA polymerase II transcription regulatory region sequence-specific DNA binding; RNA polymerase II cis-regulatory region sequence-specific DNA binding; DNA-binding transcription factor activity, RNA polymerase II-specific; DNA-binding transcription repressor activity, RNA polymerase II-specific; DNA binding; zinc ion binding; metal ion binding
Kng2	8356.49	-0.299751	0.0502257	-5.96808	2.40067e-09	1.16244e-06	kininogen 2	ENSMUSG00000060459.13	385643	ENSMUSG00000060459	cGMP-PKG signaling pathway; Sphingolipid signaling pathway; Neuroactive ligand-receptor interaction; Complement and coagulation cascades; Inflammatory mediator regulation of TRP channels; Regulation of actin cytoskeleton; Chagas disease; African trypanosomiasis; Pathways in cancer	inflammatory response; negative regulation of cell adhesion; positive regulation of cytosolic calcium ion concentration; blood coagulation; hemostasis; negative regulation of blood coagulation; killing of cells of another organism; vasodilation; negative regulation of proteolysis; negative regulation of multicellular organismal process; antimicrobial humoral immune response mediated by antimicrob…	extracellular region; extracellular space	cysteine-type endopeptidase inhibitor activity; signaling receptor binding; hormone activity; peptidase inhibitor activity
Hhipl1	41.7406	-0.299552	0.145994	-2.05182	0.0401876	0.235871	hedgehog interacting protein-like 1	ENSMUSG00000021260.7	214305	ENSMUSG00000021260		smoothened signaling pathway; biological_process; cell population proliferation; cell migration; artery development	extracellular region; membrane	molecular_function; protein binding
1700011H14Rik	13.8512	-0.299464	0.171605	-1.74508	0.0809711	0.337782		ENSMUSG00000021850.13
Gm13522	63.4324	-0.298452	0.147287	-2.02634	0.0427305	0.243012	predicted gene 13522	ENSMUSG00000086447.2	108168754	ENSMUSG00000086447
A430110L20Rik	17.1538	-0.296935	0.138596	-2.14246	0.0321568	0.208311	RIKEN cDNA A430110L20 gene	ENSMUSG00000054135.2	329307	ENSMUSG00000054135
Timeless	166.928	-0.29658	0.064092	-4.62741	3.70265e-06	0.000528427	timeless circadian clock 1	ENSMUSG00000039994.15	21853	ENSMUSG00000039994		DNA replication checkpoint signaling; negative regulation of transcription by RNA polymerase II; branching involved in ureteric bud morphogenesis; kidney development; morphogenesis of an epithelium; DNA repair; DNA damage response; circadian rhythm; lung development; replication fork processing; regulation of circadian rhythm; positive regulation of circadian rhythm; replication fork arrest; cell…	chromatin; nucleus; nucleoplasm; chromosome; replication fork protection complex; site of double-strand break	DNA binding; protein binding; enzyme activator activity; identical protein binding
Defb1	46.6978	-0.296327	0.199175	-1.48777	0.136811	0.441855	defensin beta 1	ENSMUSG00000044748.8	13214	ENSMUSG00000044748	ABC transporters; Staphylococcus aureus infection	innate immune response in mucosa; defense response; response to bacterium; calcium-mediated signaling; antibacterial humoral response; response to testosterone; defense response to bacterium; innate immune response; defense response to Gram-negative bacterium; defense response to Gram-positive bacterium; positive regulation of flagellated sperm motility involved in capacitation; antimicrobial hum…	extracellular region; extracellular space; membrane; sperm midpiece; microvesicle	CCR6 chemokine receptor binding; identical protein binding
C330011M18Rik	10.327	-0.296129	0.182782	-1.62012	0.105207	0.385758		ENSMUSG00000056753.3		ENSMUSG00000056753
Gm44349	18.6185	-0.295954	0.129357	-2.28789	0.0221441	0.169335		ENSMUSG00000105100.1
Gpr160	15.0322	-0.29592	0.17149	-1.72558	0.0844233	0.344038	G protein-coupled receptor 160	ENSMUSG00000037661.14	71862	ENSMUSG00000037661		signal transduction; G protein-coupled receptor signaling pathway	plasma membrane; membrane; receptor complex	G protein-coupled receptor activity
RP23-118B13.1	161.651	-0.29571	0.176832	-1.67226	0.0944727	0.363468		ENSMUSG00000109674.1
RP23-64O4.3	75.7415	-0.295022	0.108318	-2.72367	0.0064561	0.0831261		ENSMUSG00000109702.1
Arhgef37	202.697	-0.294658	0.125243	-2.35268	0.0186388	0.152703	Rho guanine nucleotide exchange factor 37	ENSMUSG00000045094.7	328967	ENSMUSG00000045094			cellular_component; cytoplasm	guanyl-nucleotide exchange factor activity
Cystm1	171.85	-0.294437	0.118839	-2.47761	0.0132267	0.123623	cysteine-rich transmembrane module containing 1	ENSMUSG00000046727.12	66060	ENSMUSG00000046727			membrane	molecular_function
Prdm16	12.7389	-0.293431	0.147626	-1.98767	0.0468483	0.255141	PR domain containing 16	ENSMUSG00000039410.16	70673	ENSMUSG00000039410	Lysine degradation; Metabolic pathways; Thermogenesis	negative regulation of transcription by RNA polymerase II; tolerance induction in gut-associated lymphoid tissue; chromatin remodeling; regulation of transcription by RNA polymerase II; stem cell population maintenance; neurogenesis; cell differentiation; negative regulation of transforming growth factor beta receptor signaling pathway; negative regulation of granulocyte differentiation; methylat…	chromatin; nucleus; nucleoplasm; transcription regulator complex; cytoplasm; cytosol; aggresome; transcription repressor complex	transcription cis-regulatory region binding; RNA polymerase II cis-regulatory region sequence-specific DNA binding; DNA-binding transcription repressor activity, RNA polymerase II-specific; DNA-binding transcription activator activity, RNA polymerase II-specific; DNA binding; DNA-binding transcription factor activity; transcription coregulator activity; transcription coactivator activity; transcr…
Chpt1	6296.03	0.262804	0.0702352	3.74177	0.00018273	0.00779073	choline phosphotransferase 1	ENSMUSG00000060002.14	212862	ENSMUSG00000060002	Phosphonate and phosphinate metabolism; Glycerophospholipid metabolism; Ether lipid metabolism; Metabolic pathways; Choline metabolism in cancer	lipid metabolic process; phosphatidylcholine biosynthetic process; CDP-choline pathway; platelet activating factor biosynthetic process; phospholipid biosynthetic process	Golgi membrane; cytoplasm; endoplasmic reticulum membrane; Golgi apparatus; endomembrane system; membrane	diacylglycerol cholinephosphotransferase activity; transferase activity; phosphotransferase activity, for other substituted phosphate groups; metal ion binding
D630003M21Rik	40.3646	-0.292207	0.12968	-2.25329	0.0242409	0.177174	RIKEN cDNA D630003M21 gene	ENSMUSG00000037813.13	228846	ENSMUSG00000037813		biological_process	cellular_component	molecular_function
Arhgef26	1174.64	-0.29166	0.147247	-1.98076	0.0476185	0.257421	Rho guanine nucleotide exchange factor 26	ENSMUSG00000036885.14	622434	ENSMUSG00000036885	Bacterial invasion of epithelial cells; Salmonella infection	endothelial cell morphogenesis; regulation of actin cytoskeleton organization; ruffle assembly	cellular_component; cytosol; cell projection	guanyl-nucleotide exchange factor activity
Gpr162	53.1289	-0.290191	0.0994734	-2.91727	0.00353111	0.0565228	G protein-coupled receptor 162	ENSMUSG00000038390.11	14788	ENSMUSG00000038390		signal transduction; G protein-coupled receptor signaling pathway; biological_process	cellular_component; plasma membrane; membrane	molecular_function; G protein-coupled receptor activity
Col13a1	117.498	-0.289927	0.123294	-2.3515	0.0186981	0.152992	collagen, type XIII, alpha 1	ENSMUSG00000058806.14	12817	ENSMUSG00000058806	Protein digestion and absorption	ossification; morphogenesis of a branching structure; endochondral ossification; cell adhesion; cell-matrix adhesion; cell differentiation; cell-cell adhesion	collagen trimer; basement membrane; plasma membrane; cell-cell junction; membrane; extracellular matrix; synapse; postsynaptic membrane	heparin binding; extracellular matrix structural constituent conferring tensile strength
Zfp566	14.6761	-0.289896	0.14508	-1.99817	0.0456978	0.252483	zinc finger protein 566	ENSMUSG00000078768.2	72556	ENSMUSG00000078768		regulation of DNA-templated transcription; regulation of transcription by RNA polymerase II	nucleus	RNA polymerase II transcription regulatory region sequence-specific DNA binding; DNA-binding transcription factor activity, RNA polymerase II-specific; DNA binding; zinc ion binding; metal ion binding
Raph1	1439.21	-0.289114	0.0736886	-3.92346	8.72846e-05	0.00460469	Ras association (RalGDS/AF-6) and pleckstrin homology domains 1	ENSMUSG00000026014.15	77300	ENSMUSG00000026014		signal transduction; axon extension	cytoplasm; cytosol; cytoskeleton; plasma membrane; membrane; nuclear body; cell leading edge	protein binding
6230400D17Rik	22.4925	-0.289077	0.129224	-2.23701	0.0252855	0.182045	RIKEN cDNA 6230400D17 gene	ENSMUSG00000097577.1	76133	ENSMUSG00000097577
Src	78.9162	-0.287886	0.102157	-2.81809	0.00483109	0.0687339	Rous sarcoma oncogene	ENSMUSG00000027646.15	20779	ENSMUSG00000027646	EGFR tyrosine kinase inhibitor resistance; Endocrine resistance; ErbB signaling pathway; Rap1 signaling pathway; Chemokine signaling pathway; Hormone signaling; Mitophagy - animal; Endocytosis; Axon guidance; VEGF signaling pathway; Focal adhesion; IgSF CAM signaling; Adherens junction; Tight junction; Gap junction; Platelet activation; Neutrophil extracellular trap formation; C-type lectin recep…	negative regulation of transcription by RNA polymerase II; primary ovarian follicle growth; positive regulation of cytokine production; immune system process; cell adhesion; epidermal growth factor receptor signaling pathway; transforming growth factor beta receptor signaling pathway; integrin-mediated signaling pathway; gamete generation; lactation; positive regulation of cell population prolife…	podosome; nucleus; nucleoplasm; cytoplasm; mitochondrion; mitochondrial inner membrane; lysosome; late endosome; cytosol; cytoskeleton; actin filament; plasma membrane; caveola; cell-cell junction; focal adhesion; membrane; cell junction; axon; ruffle membrane; neuronal cell body; dendritic growth cone; perinuclear region of cytoplasm; anchoring junction; synaptic membrane; glutamatergic synapse;…	nucleotide binding; protein kinase activity; protein tyrosine kinase activity; non-membrane spanning protein tyrosine kinase activity; protein kinase C binding; signaling receptor binding; insulin receptor binding; integrin binding; protein binding; ATP binding; phospholipase activator activity; kinase activity; transferase activity; enzyme binding; protein kinase binding; protein domain specific…
Tnfsf13b	12.778	-0.287411	0.172301	-1.66808	0.0952998	0.365266	tumor necrosis factor (ligand) superfamily, member 13b	ENSMUSG00000031497.9	24099	ENSMUSG00000031497	Cytokine-cytokine receptor interaction; NF-kappa B signaling pathway; Intestinal immune network for IgA production; Rheumatoid arthritis	B cell homeostasis; lymphocyte homeostasis; transitional one stage B cell differentiation; positive regulation of germinal center formation; immune response; B cell differentiation; positive regulation of B cell proliferation; T cell costimulation; B cell costimulation; tumor necrosis factor-mediated signaling pathway; positive regulation of T cell proliferation; skin development; regulation of i…	extracellular region; extracellular space; cytoplasm; plasma membrane; focal adhesion; membrane; perinuclear region of cytoplasm	cytokine activity; tumor necrosis factor receptor binding
Pstpip2	264.115	-0.287338	0.125538	-2.28885	0.0220883	0.169194	proline-serine-threonine phosphatase-interacting protein 2	ENSMUSG00000025429.8	19201	ENSMUSG00000025429		cytoskeleton organization	cytoplasm; cytosol; cytoskeleton; plasma membrane; membrane	actin binding; protein binding
Irs2	764.513	-0.287052	0.0919122	-3.12312	0.00178947	0.03589	insulin receptor substrate 2	ENSMUSG00000038894.7	384783	ENSMUSG00000038894	cGMP-PKG signaling pathway; FoxO signaling pathway; Hormone signaling; Autophagy - animal; AMPK signaling pathway; Longevity regulating pathway; Longevity regulating pathway - multiple species; Insulin signaling pathway; Adipocytokine signaling pathway; Regulation of lipolysis in adipocytes; Type II diabetes mellitus; Insulin resistance; Non-alcoholic fatty liver disease; Growth hormone synthesis…	positive regulation of mesenchymal cell proliferation; negative regulation of B cell apoptotic process; signal transduction; brain development; positive regulation of cell population proliferation; insulin receptor signaling pathway; response to glucose; epithelial cell migration; positive regulation of epithelial cell migration; negative regulation of long-chain fatty acid import across plasma m…	cytoplasm; cytosol; plasma membrane	transmembrane receptor protein tyrosine kinase adaptor activity; insulin receptor binding; protein binding; protein kinase binding; protein phosphatase binding; protein domain specific binding; protein-macromolecule adaptor activity; signaling adaptor activity; phosphatidylinositol 3-kinase binding; 14-3-3 protein binding; phosphatidylinositol 3-kinase activator activity
Tiparp	178.598	-0.286197	0.109746	-2.60781	0.00911241	0.10116	TCDD-inducible poly(ADP-ribose) polymerase	ENSMUSG00000034640.9	99929	ENSMUSG00000034640		vasculogenesis; kidney development; androgen metabolic process; estrogen metabolic process; female gonad development; post-embryonic development; negative regulation of gene expression; hemopoiesis; positive regulation of protein catabolic process; platelet-derived growth factor receptor signaling pathway; skeletal system morphogenesis; smooth muscle tissue development; roof of mouth development;…	nucleus	cis-regulatory region sequence-specific DNA binding; NAD+ poly-ADP-ribosyltransferase activity; zinc ion binding; transferase activity; glycosyltransferase activity; nucleotidyltransferase activity; metal ion binding; NAD+-protein-cysteine ADP-ribosyltransferase activity; NAD+-protein-aspartate ADP-ribosyltransferase activity; NAD+-protein-glutamate ADP-ribosyltransferase activity; NAD+-protein m…
Lrp1	28100.3	-0.286131	0.0772589	-3.70353	0.000212616	0.00860494	low density lipoprotein receptor-related protein 1	ENSMUSG00000040249.15	16971	ENSMUSG00000040249	Efferocytosis; Cholesterol metabolism; Alzheimer disease; Malaria	astrocyte activation involved in immune response; cardiac septum development; alcohol metabolic process; endocytosis; receptor-mediated endocytosis; phagocytosis; lysosomal transport; enzyme-linked receptor protein signaling pathway; positive regulation of cytosolic calcium ion concentration; steroid metabolic process; cholesterol metabolic process; negative regulation of macromolecule metabolic …	nucleus; nucleolus; cytoplasm; endosome; early endosome; Golgi apparatus; microtubule organizing center; cytosol; cytoskeleton; plasma membrane; clathrin-coated pit; external side of plasma membrane; membrane; basolateral plasma membrane; clathrin-coated vesicle; dendrite; insulin-responsive compartment; neuronal cell body; organelle; receptor complex; axonal growth cone; apical part of cell; pos…	protease binding; signaling receptor binding; calcium ion binding; protein binding; coreceptor activity; alpha-2 macroglobulin receptor activity; clathrin heavy chain binding; apolipoprotein binding; cargo receptor activity; protein-containing complex binding; metal ion binding; protein serine/threonine kinase binding
Lss	1615.16	-0.285738	0.112106	-2.54881	0.0108091	0.111254	lanosterol synthase	ENSMUSG00000033105.12	16987	ENSMUSG00000033105	Steroid biosynthesis; Metabolic pathways	lipid metabolic process; steroid biosynthetic process; cholesterol biosynthetic process; triterpenoid biosynthetic process; sterol metabolic process; regulation of protein stability; cholesterol biosynthetic process via desmosterol; cholesterol biosynthetic process via lathosterol; zymosterol biosynthetic process	endoplasmic reticulum; endoplasmic reticulum membrane; lipid droplet; membrane; cytoplasmic side of endoplasmic reticulum membrane	lanosterol synthase activity; isomerase activity; intramolecular transferase activity
Ddias	17.7889	-0.285649	0.16088	-1.77554	0.0758091	0.325465	DNA damage-induced apoptosis suppressor	ENSMUSG00000030641.10	74041	ENSMUSG00000030641		apoptotic process; DNA damage response; spermatid development; hemopoiesis; cellular response to UV; negative regulation of apoptotic process; regulation of cell cycle; cellular response to cytokine stimulus; cellular response to hydroperoxide; cellular response to gamma radiation; regulation of DNA stability; negative regulation of intrinsic apoptotic signaling pathway in response to DNA damage;…	nucleus; cytoplasm	molecular_function
Pde1a	70.4623	-0.285552	0.0958104	-2.98039	0.00287883	0.0492818	phosphodiesterase 1A, calmodulin-dependent	ENSMUSG00000059173.19	18573	ENSMUSG00000059173	Purine metabolism; Metabolic pathways; Calcium signaling pathway; Olfactory transduction; Taste transduction; Renin secretion; Morphine addiction	signal transduction; regulation of smooth muscle cell apoptotic process; cGMP catabolic process; regulation of smooth muscle cell proliferation; negative regulation of cAMP/PKA signal transduction	cilium; motile cilium; sperm flagellum; cell projection; neuronal cell body	3',5'-cyclic-nucleotide phosphodiesterase activity; 3',5'-cyclic-AMP phosphodiesterase activity; calmodulin-activated dual specificity 3',5'-cyclic-GMP, 3',5'-cyclic-AMP phosphodiesterase activity; calmodulin binding; phosphoric diester hydrolase activity; hydrolase activity; metal ion binding; 3',5'-cyclic-GMP phosphodiesterase activity; calmodulin-activated 3',5'-cyclic-GMP phosphodiesterase ac…
Fmn1	114.399	-0.285122	0.166427	-1.71319	0.0866776	0.348111	formin 1	ENSMUSG00000044042.18	14260	ENSMUSG00000044042		kidney development; gene expression; actin cytoskeleton organization; positive regulation of actin filament polymerization; forelimb morphogenesis; hindlimb morphogenesis; actin nucleation; skeletal system morphogenesis; dendrite morphogenesis; positive regulation of actin nucleation; positive regulation of focal adhesion assembly; limb development; ureteric bud invasion	nucleus; cytoplasm; endoplasmic reticulum membrane; cytoskeleton; actin filament; plasma membrane; adherens junction; microtubule cytoskeleton; membrane; anchoring junction	actin binding; protein binding; microtubule binding; SH3 domain binding
Col8a1	14.3294	-0.284867	0.183278	-1.55429	0.120115	0.414488	collagen, type VIII, alpha 1	ENSMUSG00000068196.4	12837	ENSMUSG00000068196	Protein digestion and absorption	angiogenesis; endothelial cell proliferation; cell adhesion; positive regulation of cell-substrate adhesion; endodermal cell differentiation; camera-type eye morphogenesis	extracellular region; collagen trimer; basement membrane; extracellular space; extracellular matrix	extracellular matrix structural constituent conferring tensile strength
Myh11	132.409	-0.284813	0.211299	-1.34792	0.177686	0.498002	myosin, heavy polypeptide 11, smooth muscle	ENSMUSG00000018830.8	17880	ENSMUSG00000018830	Virion - Lassa virus and SFTS virus; Vascular smooth muscle contraction; IgSF CAM signaling; Tight junction; Regulation of actin cytoskeleton; Motor proteins; Cytoskeleton in muscle cells	smooth muscle contraction; skeletal muscle myosin thick filament assembly; actomyosin structure organization; elastic fiber assembly; cardiac muscle cell development	stress fiber; cytoplasm; muscle myosin complex; brush border; myosin complex; myosin II complex; myofibril; smooth muscle contractile fiber; myosin filament; melanosome	microfilament motor activity; nucleotide binding; cytoskeletal motor activity; actin binding; calmodulin binding; ATP binding; structural constituent of muscle; actin filament binding
Pgm3	443.247	-0.284789	0.0898577	-3.16933	0.0015279	0.0323236	phosphoglucomutase 3	ENSMUSG00000056131.13	109785	ENSMUSG00000056131	Amino sugar and nucleotide sugar metabolism; Metabolic pathways; Biosynthesis of nucleotide sugars	carbohydrate metabolic process; UDP-N-acetylglucosamine biosynthetic process; protein N-linked glycosylation; protein O-linked glycosylation; spermatogenesis; hemopoiesis		magnesium ion binding; phosphoacetylglucosamine mutase activity; isomerase activity; intramolecular phosphotransferase activity; metal ion binding
Capg	52.4064	-0.284703	0.152384	-1.86833	0.0617162	0.292979	capping actin protein, gelsolin like	ENSMUSG00000056737.14	12332	ENSMUSG00000056737		central nervous system development; actin polymerization or depolymerization; cell projection assembly; actin filament severing; barbed-end actin filament capping; actin filament capping; cellular response to type II interferon	ruffle; nucleus; nucleoplasm; chromosome; nucleolus; cytoplasm; centriole; actin cytoskeleton; lamellipodium; melanosome; cell projection; phagocytic vesicle; mitotic spindle; Flemming body	actin binding; phosphatidylinositol-4,5-bisphosphate binding; protein domain specific binding; protein-containing complex binding; actin filament binding
Runx1	16.2314	-0.284408	0.208929	-1.36127	0.173428	0.492944	runt related transcription factor 1	ENSMUSG00000022952.16	12394	ENSMUSG00000022952	Tight junction; Th17 cell differentiation; Pathways in cancer; Transcriptional misregulation in cancer; Chronic myeloid leukemia; Acute myeloid leukemia	negative regulation of transcription by RNA polymerase II; skeletal system development; ossification; in utero embryonic development; liver development; chondrocyte differentiation; myeloid progenitor cell differentiation; myeloid leukocyte differentiation; regulation of T cell anergy; regulation of DNA-templated transcription; regulation of transcription by RNA polymerase II; central nervous sys…	chromatin; basement membrane; nucleus; nucleoplasm; core-binding factor complex; protein-containing complex	transcription cis-regulatory region binding; RNA polymerase II transcription regulatory region sequence-specific DNA binding; RNA polymerase II cis-regulatory region sequence-specific DNA binding; DNA-binding transcription factor activity, RNA polymerase II-specific; transcription corepressor binding; transcription coactivator binding; DNA-binding transcription activator activity, RNA polymerase …
Myadm	1075.73	-0.284233	0.0732769	-3.87889	0.000104932	0.00524055	myeloid-associated differentiation marker	ENSMUSG00000068566.12	50918	ENSMUSG00000068566		negative regulation of gene expression; positive regulation of cell migration; negative regulation of actin filament polymerization; membrane raft organization; negative regulation of heterotypic cell-cell adhesion; intracellular signal transduction; protein localization to plasma membrane raft; establishment of endothelial barrier; positive regulation of substrate adhesion-dependent cell spreadi…	ruffle; plasma membrane; cell-cell junction; membrane; cortical actin cytoskeleton; membrane raft
Plscr1	447.842	-0.284163	0.0849465	-3.3452	0.00082222	0.0209542	phospholipid scramblase 1	ENSMUSG00000032369.13	22038	ENSMUSG00000032369		phosphatidylserine biosynthetic process; lipid transport; apoptotic process; acute-phase response; immune response; response to lead ion; positive regulation of gene expression; plasma membrane phospholipid scrambling; myeloid cell differentiation; regulation of mast cell activation; response to interferon-alpha; response to interferon-beta; positive regulation of apoptotic process; negative regu…	nucleus; nucleoplasm; nucleolus; cytoplasm; Golgi apparatus; cytosol; plasma membrane; membrane; membrane raft; perinuclear region of cytoplasm	magnesium ion binding; DNA-binding transcription activator activity, RNA polymerase II-specific; virus receptor activity; DNA binding; nuclease activity; epidermal growth factor receptor binding; calcium ion binding; protein binding; zinc ion binding; hydrolase activity; SH3 domain binding; phospholipid scramblase activity; enzyme binding; lead ion binding; CD4 receptor binding; mercury ion bindi…
Tstd1	265.66	-0.284	0.0771798	-3.67972	0.000233489	0.00922993	thiosulfate sulfurtransferase (rhodanese)-like domain containing 1	ENSMUSG00000103711.1	226654	ENSMUSG00000103711		biological_process; sulfide oxidation, using sulfide:quinone oxidoreductase	cytoplasm; mitochondrion; cytosol; cytoplasmic ribonucleoprotein granule	DNA-binding transcription factor activity, RNA polymerase II-specific; molecular_function; DNA binding; double-stranded DNA binding; DNA-binding transcription factor activity; identical protein binding; sequence-specific DNA binding; protein-containing complex binding; thiosulfate-thiol sulfurtransferase activity
Cpsf4l	317.753	-0.283912	0.094861	-2.99292	0.00276321	0.0478462	cleavage and polyadenylation specific factor 4-like	ENSMUSG00000018727.19	52670	ENSMUSG00000018727		mRNA processing; mRNA 3'-end processing	nucleus; mRNA cleavage and polyadenylation specificity factor complex	RNA binding; zinc ion binding; metal ion binding
Itgb3	87.1129	-0.283823	0.137036	-2.07116	0.0383436	0.229089	integrin beta 3	ENSMUSG00000020689.4	16416	ENSMUSG00000020689	Virion - Herpesvirus; Rap1 signaling pathway; Hormone signaling; Phagosome; Efferocytosis; PI3K-Akt signaling pathway; Osteoclast differentiation; Focal adhesion; ECM-receptor interaction; IgSF CAM signaling; Platelet activation; Neutrophil extracellular trap formation; Hematopoietic cell lineage; Regulation of actin cytoskeleton; Cytoskeleton in muscle cells; Thyroid hormone signaling pathway; H…	positive regulation of endothelial cell proliferation; positive regulation of cell-matrix adhesion; positive regulation of leukocyte migration; cell-substrate junction assembly; cell adhesion; cell-matrix adhesion; integrin-mediated signaling pathway; embryo implantation; regulation of G protein-coupled receptor signaling pathway; positive regulation of cell population proliferation; positive reg…	nucleus; nucleoplasm; plasma membrane; cell-cell junction; focal adhesion; integrin complex; external side of plasma membrane; cell surface; membrane; apical plasma membrane; lamellipodium membrane; filopodium membrane; microvillus membrane; ruffle membrane; protein-containing complex; integrin alpha9-beta1 complex; integrin alphav-beta3 complex; alphav-beta3 integrin-PKCalpha complex; alphav-bet…	fibronectin binding; protease binding; protein disulfide isomerase activity; protein kinase C binding; integrin binding; protein binding; fibroblast growth factor binding; enzyme binding; C-X3-C chemokine binding; insulin-like growth factor I binding; neuregulin binding; identical protein binding; vascular endothelial growth factor receptor 2 binding; metal ion binding; cell adhesion molecule bin…
Jade2	499.813	-0.283637	0.104574	-2.71232	0.0066814	0.0846603	jade family PHD finger 2	ENSMUSG00000020387.15	76901	ENSMUSG00000020387		protein polyubiquitination; regulation of cell growth; regulation of DNA replication; chromatin remodeling; regulation of DNA-templated transcription; regulation of transcription by RNA polymerase II; protein ubiquitination; regulation of neurogenesis; positive regulation of neurogenesis; regulation of cell cycle; protein autoubiquitination; neuron projection extension; regulation of DNA biosynth…	histone acetyltransferase complex; nucleoplasm	protein binding; zinc ion binding; transferase activity; histone H3K14 acetyltransferase activity; histone H4K5 acetyltransferase activity; histone H4K8 acetyltransferase activity; histone H4K12 acetyltransferase activity; metal ion binding; ubiquitin protein ligase activity
Acss2	6576.51	-0.283389	0.17305	-1.63761	0.101503	0.378383	acyl-CoA synthetase short-chain family member 2	ENSMUSG00000027605.18	60525	ENSMUSG00000027605	Glycolysis / Gluconeogenesis; Pyruvate metabolism; Glyoxylate and dicarboxylate metabolism; Propanoate metabolism; Metabolic pathways; Carbon metabolism	acetyl-CoA biosynthetic process; lipid metabolic process; long-term memory; lipid biosynthetic process; acetate biosynthetic process; propionate biosynthetic process; small molecule metabolic process; positive regulation of DNA-templated transcription	nucleus; cytoplasm; cytosol	nucleotide binding; chromatin binding; transcription coactivator activity; acetate-CoA ligase activity; protein binding; ATP binding; ligase activity; propionate-CoA ligase activity
Ssbp4	159.12	-0.283263	0.113568	-2.49422	0.0126236	0.119685	single stranded DNA binding protein 4	ENSMUSG00000070003.7	76900	ENSMUSG00000070003		positive regulation of transcription by RNA polymerase II	nucleus	DNA binding; single-stranded DNA binding; protein binding
Ndufa4l2	50.3673	-0.282557	0.109266	-2.58595	0.00971102	0.104437	Ndufa4, mitochondrial complex associated like 2	ENSMUSG00000040280.9	407790	ENSMUSG00000040280	Oxidative phosphorylation; Metabolic pathways; Thermogenesis; Retrograde endocannabinoid signaling; Non-alcoholic fatty liver disease; Alzheimer disease; Parkinson disease; Amyotrophic lateral sclerosis; Huntington disease; Prion disease; Pathways of neurodegeneration - multiple diseases; Chemical carcinogenesis - reactive oxygen species; Diabetic cardiomyopathy	biological_process	respiratory chain complex IV	molecular_function
Vwa1	16.3135	-0.280998	0.15009	-1.8722	0.0611786	0.29114	von Willebrand factor A domain containing 1	ENSMUSG00000042116.3	246228	ENSMUSG00000042116		extracellular matrix organization; behavioral response to pain; protein homooligomerization	extracellular region; basement membrane; interstitial matrix; extracellular matrix	extracellular matrix structural constituent; protein binding; identical protein binding; protein homodimerization activity; microfibril binding
Kdm5b	577.693	-0.280636	0.062922	-4.46007	8.19334e-06	0.000951629	lysine demethylase 5B	ENSMUSG00000042207.17	75605	ENSMUSG00000042207		chromatin organization; chromatin remodeling; regulation of DNA-templated transcription; single fertilization; post-embryonic development; positive regulation of gene expression; positive regulation of mammary gland epithelial cell proliferation; regulation of circadian rhythm; cellular response to fibroblast growth factor stimulus; negative regulation of DNA-templated transcription; rhythmic pro…	chromatin; nucleus; nucleoplasm; cytosol	nucleic acid binding; DNA binding; transcription corepressor activity; protein binding; zinc ion binding; oxidoreductase activity; histone H3K4 demethylase activity; histone H3K4me/H3K4me2/H3K4me3 demethylase activity; histone binding; metal ion binding; dioxygenase activity; sequence-specific double-stranded DNA binding
Hacd1	187.501	0.240861	0.0615933	3.9105	9.21051e-05	0.0047123	3-hydroxyacyl-CoA dehydratase 1	ENSMUSG00000063275.15	30963	ENSMUSG00000063275	Fatty acid elongation; Biosynthesis of unsaturated fatty acids; Metabolic pathways; Fatty acid metabolism	lipid metabolic process; fatty acid metabolic process; fatty acid biosynthetic process; regulation of G2/M transition of mitotic cell cycle; positive regulation of cell-substrate adhesion; myotube differentiation; sphingolipid biosynthetic process; fatty acid elongation; very long-chain fatty acid biosynthetic process; protein-containing complex assembly; cementum mineralization; regulation of G1…	endoplasmic reticulum; endoplasmic reticulum membrane; membrane	lyase activity; 3-hydroxyacyl-CoA dehydratase activity; enzyme binding; hydroxyapatite binding; very-long-chain (3R)-3-hydroxyacyl-CoA dehydratase activity
Gdf10	158.624	-0.280548	0.0917374	-3.05816	0.002227	0.0414749	growth differentiation factor 10	ENSMUSG00000021943.6	14560	ENSMUSG00000021943	Cytokine-cytokine receptor interaction	ossification; osteoblast differentiation; cell surface receptor protein serine/threonine kinase signaling pathway; cerebellum development; regulation of ossification; negative regulation of ossification; ovulation cycle; fat cell differentiation; positive regulation of osteoblast differentiation; response to transforming growth factor beta; response to kainic acid	extracellular region; extracellular space	cytokine activity; growth factor activity
Sorbs3	1454.12	-0.280463	0.0877238	-3.19712	0.00138809	0.0302082	sorbin and SH3 domain containing 3	ENSMUSG00000022091.5	20410	ENSMUSG00000022091		negative regulation of transcription by RNA polymerase II; cell adhesion; cell-substrate adhesion; positive regulation of MAPK cascade; positive regulation of stress fiber assembly	nucleus; cytoplasm; cytoskeleton; focal adhesion; cell-substrate junction; anchoring junction	vinculin binding
Serpina3n	10463.1	-0.280367	0.0690542	-4.0601	4.90513e-05	0.00324409	serine (or cysteine) peptidase inhibitor, clade A, member 3N	ENSMUSG00000021091.8	20716	ENSMUSG00000021091		acute-phase response; response to bacterium; response to cytokine; response to peptide hormone	extracellular region; extracellular space	serine-type endopeptidase inhibitor activity; peptidase inhibitor activity
Gm13375	89.3715	-0.279298	0.0873349	-3.19801	0.00138378	0.0302082	predicted gene 13375	ENSMUSG00000075514.4	433408	ENSMUSG00000075514		biological_process	cellular_component	molecular_function
Ttc26	11.3657	-0.279252	0.177872	-1.56996	0.116424	0.407455		ENSMUSG00000056832.14
Ccdc57	141.533	-0.278875	0.0960907	-2.90221	0.00370542	0.0585302	coiled-coil domain containing 57	ENSMUSG00000048445.6	71276	ENSMUSG00000048445		G2/M transition of mitotic cell cycle; microtubule nucleation; centriole replication; positive regulation of mitotic cell cycle; cilium assembly	cytoplasm; centrosome; centriole; spindle; cytoskeleton; spindle microtubule; centriolar satellite	molecular_function
B4galnt3	79.9769	-0.27844	0.147202	-1.89155	0.0585513	0.285451	beta-1,4-N-acetyl-galactosaminyl transferase 3	ENSMUSG00000041372.9	330406	ENSMUSG00000041372	Various types of N-glycan biosynthesis; Metabolic pathways		Golgi apparatus; membrane; Golgi cisterna membrane	acetylgalactosaminyltransferase activity; transferase activity; glycosyltransferase activity; N-acetyl-beta-glucosaminyl-derivative 4-beta-N-acetylgalactosaminyltransferase activity; glucuronosyl-N-acetylgalactosaminyl-proteoglycan 4-beta-N-acetylgalactosaminyltransferase activity
Cul9	402.952	-0.278419	0.0506667	-5.4951	3.90485e-08	1.20323e-05	cullin 9	ENSMUSG00000040327.16	78309	ENSMUSG00000040327		microtubule cytoskeleton organization; ubiquitin-dependent protein catabolic process; regulation of mitotic nuclear division; protein ubiquitination	cytoplasm; cytosol; cullin-RING ubiquitin ligase complex	nucleotide binding; ATP binding; zinc ion binding; transferase activity; ubiquitin protein ligase binding; metal ion binding
Gm5638	28.0824	-0.27839	0.296224	-0.939795	0.347323	0.668703	S-adenosylhomocysteine hydrolase pseudogene	ENSMUSG00000081084.1	434788	ENSMUSG00000081084
Rdh9	487.056	-0.278385	0.0880804	-3.16058	0.00157455	0.0328934	retinol dehydrogenase 9	ENSMUSG00000056148.8	103142	ENSMUSG00000056148	Retinol metabolism; Metabolic pathways	androgen biosynthetic process; steroid metabolic process; retinol metabolic process; retinoic acid metabolic process; 9-cis-retinoic acid biosynthetic process; positive regulation of retinoic acid biosynthetic process	endoplasmic reticulum membrane; organelle membrane; intracellular membrane-bounded organelle	all-trans-retinol dehydrogenase (NAD+) activity; oxidoreductase activity; androsterone dehydrogenase [NAD(P)+] activity; androstan-3-alpha,17-beta-diol dehydrogenase (NAD+) activity
Tacc1	1135.12	-0.278369	0.0719667	-3.86803	0.00010972	0.00535101	transforming, acidic coiled-coil containing protein 1	ENSMUSG00000065954.11	320165	ENSMUSG00000065954		microtubule cytoskeleton organization; mitotic spindle organization; nuclear migration; cell population proliferation; cerebral cortex development; neurogenesis; interkinetic nuclear migration; regulation of microtubule-based process; positive regulation of DNA-templated transcription; cell division	nucleus; cytoplasm; centrosome; cytosol; cytoskeleton; midbody	transcription coactivator activity; nuclear receptor binding; protein domain specific binding; nuclear estrogen receptor binding; nuclear glucocorticoid receptor binding; nuclear retinoic acid receptor binding; peroxisome proliferator activated receptor binding; nuclear retinoid X receptor binding; nuclear thyroid hormone receptor binding
Rpl17-ps10	12.8702	-0.278107	0.149951	-1.85465	0.0636463	0.296804	ribosomal protein L17, pseudogene 10	ENSMUSG00000081895.3	100042880	ENSMUSG00000081895
Tshz2	37.6869	-0.277615	0.118371	-2.34529	0.0190124	0.154201	teashirt zinc finger family member 2	ENSMUSG00000047907.11	228911	ENSMUSG00000047907		regulation of transcription by RNA polymerase II; regulation of gene expression	nucleus	DNA-binding transcription factor activity, RNA polymerase II-specific; DNA binding; protein binding; zinc ion binding; metal ion binding
AY074887	15.6983	-0.277563	0.182546	-1.52051	0.128384	0.427506	cDNA sequence AY074887	ENSMUSG00000044820.6	246735	ENSMUSG00000044820		apoptotic signaling pathway; regulation of G1/S transition of mitotic cell cycle; negative regulation of stem cell proliferation	extracellular space; cytoplasm; membrane	molecular_function
Mug1	94258.3	-0.27752	0.0973752	-2.85001	0.00437185	0.0652074	murinoglobulin 1	ENSMUSG00000059908.9	17836	ENSMUSG00000059908		embryo implantation	extracellular region; extracellular space	protease binding; endopeptidase inhibitor activity; serine-type endopeptidase inhibitor activity; peptidase inhibitor activity
Orm2	273.544	-0.277343	0.19722	-1.40626	0.159647	0.473678	orosomucoid 2	ENSMUSG00000061540.3	18406	ENSMUSG00000061540		acute inflammatory response; regulation of immune system process; acute-phase response	extracellular region; extracellular space	small molecule binding
Osgin2	51.8321	-0.27728	0.102008	-2.71821	0.00656369	0.0837198	oxidative stress induced growth inhibitor family member 2	ENSMUSG00000041153.9	209212	ENSMUSG00000041153		signal transduction; negative regulation of cell growth	cellular_component	growth factor activity
Gm45083	19.6111	-0.277227	0.143125	-1.93695	0.052751	0.27132		ENSMUSG00000107785.1
Slc27a1	494.932	-0.276933	0.120557	-2.29711	0.0216124	0.166679	solute carrier family 27 (fatty acid transporter), member 1	ENSMUSG00000031808.6	26457	ENSMUSG00000031808	PPAR signaling pathway; Cornified envelope formation; Insulin resistance; Fat digestion and absorption	medium-chain fatty acid transport; long-chain fatty acid metabolic process; lipid metabolic process; fatty acid metabolic process; lipid transport; response to cold; positive regulation of triglyceride biosynthetic process; biotin transport; fatty acid transport; long-chain fatty acid transport; long-chain fatty acid import across plasma membrane; positive regulation of heat generation; response …	cytoplasm; mitochondrion; mitochondrial outer membrane; mitochondrial inner membrane; endoplasmic reticulum; endoplasmic reticulum membrane; plasma membrane; caveola; basal plasma membrane; endomembrane system; membrane; cytoplasmic vesicle	nucleotide binding; long-chain fatty acid-CoA ligase activity; long-chain fatty acid transmembrane transporter activity; protein binding; biotin transmembrane transporter activity; fatty acid transmembrane transporter activity; efflux transmembrane transporter activity; ligase activity; very long-chain fatty acid-CoA ligase activity; identical protein binding; protein serine/threonine kinase acti…
Galnt6	22.0175	-0.276857	0.161262	-1.71681	0.0860138	0.347526	polypeptide N-acetylgalactosaminyltransferase 6	ENSMUSG00000037280.12	207839	ENSMUSG00000037280	Mucin type O-glycan biosynthesis; Other types of O-glycan biosynthesis; Metabolic pathways	protein glycosylation; protein O-linked glycosylation	Golgi membrane; Golgi apparatus; membrane; perinuclear region of cytoplasm	polypeptide N-acetylgalactosaminyltransferase activity; transferase activity; glycosyltransferase activity; carbohydrate binding; metal ion binding
Ephb3	16.9513	-0.27684	0.179947	-1.53845	0.123938	0.420404	Eph receptor B3	ENSMUSG00000005958.14	13845	ENSMUSG00000005958	Axon guidance	angiogenesis; urogenital system development; cell surface receptor protein tyrosine kinase signaling pathway; nervous system development; axon guidance; axonal fasciculation; cell migration; central nervous system projection neuron axonogenesis; corpus callosum development; regulation of cell-cell adhesion; retinal ganglion cell axon guidance; substrate adhesion-dependent cell spreading; regulati…	plasma membrane; membrane; dendrite; cell projection	nucleotide binding; protein kinase activity; protein tyrosine kinase activity; transmembrane receptor protein tyrosine kinase activity; ephrin receptor activity; transmembrane-ephrin receptor activity; ATP binding; axon guidance receptor activity; kinase activity; transferase activity
Cc2d2a	148.145	-0.276732	0.123045	-2.24902	0.0245111	0.17838	coiled-coil and C2 domain containing 2A	ENSMUSG00000039765.15	231214	ENSMUSG00000039765		kidney development; neural tube closure; smoothened signaling pathway; determination of left/right symmetry; heart development; cell projection organization; axoneme assembly; camera-type eye development; motile cilium assembly; cilium assembly; protein localization to ciliary transition zone; non-motile cilium assembly; embryonic brain development	cytoplasm; cytoskeleton; cilium; ciliary transition zone; MKS complex; cell projection	protein binding
Sspo	63.6505	-0.276721	0.154807	-1.78753	0.0738521	0.320932	SCO-spondin	ENSMUSG00000029797.12	243369	ENSMUSG00000029797		cell adhesion; biological_process	extracellular region; extracellular space; cytoplasm; extracellular matrix	molecular_function; extracellular matrix structural constituent
Gm5873	17.6597	-0.275961	0.200586	-1.37577	0.168892	0.488536	farnesyl diphosphate synthetase pseudogene	ENSMUSG00000093651.1	545826	ENSMUSG00000093651
1010001B22Rik	10.8068	-0.275849	0.196881	-1.40109	0.161186	0.475493	RIKEN cDNA 1010001B22 gene	ENSMUSG00000097863.1	75403	ENSMUSG00000097863
Spata7	47.2792	-0.275698	0.08656	-3.18506	0.00144726	0.0311459	spermatogenesis associated 7	ENSMUSG00000021007.13	104871	ENSMUSG00000021007		microtubule cytoskeleton organization; visual perception; photoreceptor cell maintenance; protein localization to photoreceptor outer segment; protein localization to photoreceptor connecting cilium	photoreceptor outer segment; cytoplasm; cytoskeleton; axoneme; microtubule cytoskeleton; photoreceptor connecting cilium; ciliary basal body; cell projection; rod photoreceptor outer segment; photoreceptor distal connecting cilium	protein binding
Plcd3	24.746	-0.275653	0.130325	-2.11513	0.0344193	0.215148	phospholipase C, delta 3	ENSMUSG00000020937.14	72469	ENSMUSG00000020937	Inositol phosphate metabolism; Metabolic pathways; Calcium signaling pathway; Phosphatidylinositol signaling system; Thyroid hormone signaling pathway; AGE-RAGE signaling pathway in diabetic complications	angiogenesis; lipid metabolic process; signal transduction; lipid catabolic process; intracellular signal transduction; regulation of cell population proliferation; labyrinthine layer blood vessel development	cytoplasm; plasma membrane; membrane; cleavage furrow	phosphatidylinositol-4,5-bisphosphate phospholipase C activity; phosphoric diester hydrolase activity; hydrolase activity; metal ion binding
Ptgis	49.9053	-0.275589	0.142791	-1.93002	0.053605	0.273739	prostaglandin I2 (prostacyclin) synthase	ENSMUSG00000017969.13	19223	ENSMUSG00000017969	Arachidonic acid metabolism; Metabolic pathways	prostaglandin biosynthetic process; response to hypoxia; lipid metabolic process; fatty acid metabolic process; fatty acid biosynthetic process; icosanoid metabolic process; prostaglandin metabolic process; embryo implantation; negative regulation of cell population proliferation; positive regulation of gene expression; cyclooxygenase pathway; positive regulation of peroxisome proliferator activa…	nucleus; cytoplasm; endoplasmic reticulum; endoplasmic reticulum lumen; endoplasmic reticulum membrane; caveola; membrane	monooxygenase activity; iron ion binding; prostaglandin-I synthase activity; oxidoreductase activity, acting on paired donors, with incorporation or reduction of molecular oxygen; lyase activity; isomerase activity; heme binding; metal ion binding; hydroperoxy icosatetraenoate dehydratase activity
Tead4	12.8491	-0.275162	0.173891	-1.58238	0.113564	0.402761	TEA domain family member 4	ENSMUSG00000030353.15	21679	ENSMUSG00000030353	Hippo signaling pathway; Hippo signaling pathway - multiple species	in utero embryonic development; cell fate specification; blastocyst formation; trophectodermal cell fate commitment; DNA-templated transcription; regulation of DNA-templated transcription; regulation of transcription by RNA polymerase II; embryo implantation; hippo signaling; cell fate commitment; positive regulation of DNA-templated transcription; positive regulation of transcription by RNA poly…	nucleus; nucleoplasm; transcription regulator complex; cytoplasm; protein-DNA complex	RNA polymerase II cis-regulatory region sequence-specific DNA binding; DNA-binding transcription factor activity, RNA polymerase II-specific; DNA-binding transcription activator activity, RNA polymerase II-specific; DNA binding; DNA-binding transcription factor activity; protein binding; sequence-specific DNA binding
Mat1a	97202.9	-0.274804	0.0737534	-3.72598	0.000194556	0.00811628	methionine adenosyltransferase 1A	ENSMUSG00000037798.6	11720	ENSMUSG00000037798	Cysteine and methionine metabolism; One carbon pool by folate; Metabolic pathways; Biosynthesis of amino acids; Biosynthesis of cofactors	S-adenosylmethionine biosynthetic process; one-carbon metabolic process; L-methionine catabolic process; protein homotetramerization; protein-containing complex assembly	cytosol; nuclear matrix; methionine adenosyltransferase complex	nucleotide binding; magnesium ion binding; methionine adenosyltransferase activity; ATP binding; amino acid binding; transferase activity; identical protein binding; ADP binding; metal ion binding
Emp2	274.783	-0.274537	0.120819	-2.27229	0.0230687	0.172551	epithelial membrane protein 2	ENSMUSG00000022505.8	13731	ENSMUSG00000022505	Focal adhesion	membrane raft assembly; natural killer cell proliferation; T cell mediated cytotoxicity; regulation of cell-matrix adhesion; positive regulation of cell-matrix adhesion; regulation of glomerular filtration; apoptotic process; actin filament organization; cell adhesion; cell-matrix adhesion; embryo implantation; positive regulation of cell population proliferation; regulation of endothelial cell m…	Golgi membrane; nucleus; cytoplasm; Golgi apparatus; plasma membrane; cell surface; membrane; apical plasma membrane; cytoplasmic vesicle; membrane raft; apical part of cell; perinuclear region of cytoplasm	integrin binding; kinase binding
Htra3	76.9144	-0.274455	0.145755	-1.88298	0.0597024	0.288101	HtrA serine peptidase 3	ENSMUSG00000029096.15	78558	ENSMUSG00000029096		proteolysis; negative regulation of transforming growth factor beta receptor signaling pathway; negative regulation of BMP signaling pathway	extracellular region	endopeptidase activity; serine-type endopeptidase activity; protein binding; peptidase activity; serine-type peptidase activity; hydrolase activity; identical protein binding
Lonrf1	296.379	-0.274268	0.106686	-2.5708	0.0101464	0.107065	LON peptidase N-terminal domain and ring finger 1	ENSMUSG00000039633.6	244421	ENSMUSG00000039633			cytoplasm	zinc ion binding; metal ion binding
Podn	247.096	-0.274171	0.100538	-2.72704	0.00639051	0.0824382	podocan	ENSMUSG00000028600.15	242608	ENSMUSG00000028600		negative regulation of cell population proliferation; negative regulation of cell migration	extracellular region; extracellular space; cytoplasm	collagen binding
Apbb1	25.1512	-0.273893	0.136638	-2.00451	0.0450149	0.250848	amyloid beta precursor protein binding family B member 1	ENSMUSG00000037032.16	11785	ENSMUSG00000037032	Alzheimer disease	negative regulation of transcription by RNA polymerase II; neuron migration; double-strand break repair; chromatin organization; regulation of DNA-templated transcription; apoptotic process; smooth muscle contraction; DNA damage response; axon guidance; visual learning; positive regulation of neuron projection development; central nervous system neuron differentiation; extracellular matrix organi…	nucleus; cytoplasm; endoplasmic reticulum; plasma membrane; postsynaptic density; membrane; nuclear speck; lamellipodium; growth cone; neuromuscular junction; protein-containing complex; presynaptic membrane; cell projection; neuronal cell body; dendritic spine; main axon; synapse; postsynaptic membrane; perinuclear region of cytoplasm; Schaffer collateral - CA1 synapse; presynapse; glutamatergic…	amyloid-beta binding; chromatin binding; protein binding; ubiquitin protein ligase binding; histone binding; protein-containing complex binding; tau protein binding; molecular adaptor activity; proline-rich region binding; DNA-binding transcription factor binding
Gulo	17695.5	-0.273874	0.0693088	-3.9515	7.76633e-05	0.00428032	gulonolactone (L-) oxidase	ENSMUSG00000034450.7	268756	ENSMUSG00000034450	Ascorbate and aldarate metabolism; Metabolic pathways; Biosynthesis of cofactors	L-ascorbic acid biosynthetic process	endoplasmic reticulum; endoplasmic reticulum membrane; membrane	D-arabinono-1,4-lactone oxidase activity; oxidoreductase activity; oxidoreductase activity, acting on the CH-OH group of donors, oxygen as acceptor; L-gulonolactone oxidase activity; flavin adenine dinucleotide binding; FAD binding
Hist1h1c	1723.88	-0.273836	0.0758309	-3.61114	0.000304853	0.0108228		ENSMUSG00000036181.2
C8b	5635.94	-0.273571	0.156172	-1.75174	0.0798191	0.334835	complement component 8, beta polypeptide	ENSMUSG00000029656.13	110382	ENSMUSG00000029656	Complement and coagulation cascades; Regulation of actin cytoskeleton; Prion disease; Amoebiasis; Coronavirus disease - COVID-19; Systemic lupus erythematosus	immune system process; immune response; complement activation; complement activation, alternative pathway; complement activation, classical pathway; killing of cells of another organism; innate immune response; positive regulation of immune response; complement activation, GZMK pathway	extracellular region; membrane attack complex; extracellular space; plasma membrane; membrane; other organism cell membrane; transmembrane transporter complex	protein-containing complex binding; metal ion binding
Lifr	5164.34	-0.273302	0.122517	-2.23073	0.0256988	0.183381	LIF receptor alpha	ENSMUSG00000054263.11	16880	ENSMUSG00000054263	Cytokine-cytokine receptor interaction; Signaling pathways regulating pluripotency of stem cells; JAK-STAT signaling pathway	positive regulation of cell population proliferation; negative regulation of muscle cell apoptotic process; cytokine-mediated signaling pathway; animal organ regeneration; response to cytokine; oncostatin-M-mediated signaling pathway; neuron projection morphogenesis; leukemia inhibitory factor signaling pathway; ciliary neurotrophic factor-mediated signaling pathway	extracellular region; plasma membrane; external side of plasma membrane; membrane; receptor complex	cytokine receptor activity; ciliary neurotrophic factor receptor activity; leukemia inhibitory factor receptor activity; oncostatin-M receptor activity; ciliary neurotrophic factor receptor binding; protein binding; growth factor binding; cytokine binding
Plekhm3	45.7652	-0.273157	0.112384	-2.43058	0.0150747	0.134996	pleckstrin homology domain containing, family M, member 3	ENSMUSG00000051344.13	241075	ENSMUSG00000051344		myoblast differentiation	cytoplasm; Golgi apparatus; plasma membrane; membrane	protein binding; zinc ion binding; metal ion binding
Slc41a1	248.183	-0.27299	0.0898995	-3.03661	0.00239254	0.0434826	solute carrier family 41, member 1	ENSMUSG00000013275.9	98396	ENSMUSG00000013275		monoatomic ion transport; monoatomic cation transport; intracellular magnesium ion homeostasis; magnesium ion transport; metal ion transport; sodium ion transmembrane transport; cellular response to magnesium ion; magnesium ion transmembrane transport	plasma membrane; membrane; basolateral plasma membrane; protein-containing complex	monoatomic cation transmembrane transporter activity; magnesium ion transmembrane transporter activity; transmembrane transporter activity; inorganic cation transmembrane transporter activity; magnesium:sodium antiporter activity
A630076J17Rik	15.4027	-0.272424	0.187776	-1.45079	0.146837	0.455357	RIKEN cDNA A630076J17 gene	ENSMUSG00000094613.2	319929	ENSMUSG00000094613
Gm527	15.4159	-0.271765	0.156127	-1.74067	0.0817419	0.339747	predicted gene 527	ENSMUSG00000047227.4	217648	ENSMUSG00000047227		G protein-coupled dopamine receptor signaling pathway; memory; biological_process; gene expression; cAMP-mediated signaling; neurogenesis; NMDA selective glutamate receptor signaling pathway	cellular_component	molecular_function
Gm43254	25.4865	-0.271709	0.107528	-2.52687	0.0115085	0.114226		ENSMUSG00000105957.1		ENSMUSG00000105957
Zmym1	35.1835	-0.271442	0.113053	-2.40102	0.0163494	0.141126	zinc finger, MYM domain containing 1	ENSMUSG00000043872.14	68310	ENSMUSG00000043872		biological_process		molecular_function; zinc ion binding; protein dimerization activity
Cited4	15.6862	-0.271192	0.156368	-1.73432	0.0828614	0.341158	Cbp/p300-interacting transactivator, with Glu/Asp-rich carboxy-terminal domain, 4	ENSMUSG00000070803.6	56222	ENSMUSG00000070803		regulation of DNA-templated transcription; response to estrogen; positive regulation of DNA-templated transcription	nucleus; cytoplasm	transcription coactivator activity
Gm11914	34.5096	-0.270773	0.112693	-2.40275	0.0162722	0.141011	high-mobility group nucleosome binding domain 5 pseudogene	ENSMUSG00000082674.1	100040691	ENSMUSG00000082674
Rlf	397.157	-0.270755	0.0747971	-3.61986	0.000294767	0.0106572	rearranged L-myc fusion sequence	ENSMUSG00000049878.12	109263	ENSMUSG00000049878		regulation of transcription by RNA polymerase II; negative regulation of heterochromatin formation	nucleus	DNA-binding transcription factor activity, RNA polymerase II-specific; DNA binding; zinc ion binding; metal ion binding
Epas1	8066.98	-0.270743	0.052077	-5.19889	2.0048e-07	4.92376e-05	endothelial PAS domain protein 1	ENSMUSG00000024140.9	13819	ENSMUSG00000024140	HIF-1 signaling pathway; Pathways in cancer; Renal cell carcinoma	negative regulation of transcription by RNA polymerase II; angiogenesis; response to hypoxia; embryonic placenta development; blood vessel remodeling; regulation of heart rate; epithelial cell maturation; regulation of DNA-templated transcription; regulation of transcription by RNA polymerase II; response to oxidative stress; mitochondrion organization; visual perception; gene expression; hemopoi…	nucleus; transcription regulator complex; cytoplasm; nuclear speck	RNA polymerase II transcription regulatory region sequence-specific DNA binding; RNA polymerase II cis-regulatory region sequence-specific DNA binding; DNA-binding transcription factor activity, RNA polymerase II-specific; cis-regulatory region sequence-specific DNA binding; transcription coactivator binding; DNA-binding transcription activator activity, RNA polymerase II-specific; DNA binding; D…
Adam11	417.517	-0.270743	0.14149	-1.91351	0.0556824	0.279334	a disintegrin and metallopeptidase domain 11	ENSMUSG00000020926.16	11488	ENSMUSG00000020926		proteolysis; multicellular organismal response to stress; establishment of protein localization; behavioral response to acetic acid induced pain; behavioral response to formalin induced pain	plasma membrane; membrane; axon; presynaptic membrane; cell projection; perikaryon; synapse	metalloendopeptidase activity; protein binding; metallopeptidase activity
2810474O19Rik	643.749	-0.270279	0.127425	-2.12107	0.0339156	0.214035		ENSMUSG00000032712.16
Gm9776	27.6738	-0.270199	0.111555	-2.4221	0.0154309	0.136694	predicted gene 9776	ENSMUSG00000042857.2	328309	ENSMUSG00000042857
Cfap100	14.7273	-0.270123	0.157566	-1.71435	0.0864643	0.347962	cilia and flagella associated protein 100	ENSMUSG00000048794.14	243538	ENSMUSG00000048794		cilium movement; biological_process; inner dynein arm assembly	cytoplasm; cytoskeleton; cilium; motile cilium; ciliary basal body; cell projection; axonemal doublet microtubule	molecular_function; dynein complex binding
Steap4	2915.56	-0.270088	0.0791033	-3.41437	0.000639287	0.0180197	STEAP family member 4	ENSMUSG00000012428.9	117167	ENSMUSG00000012428		monoatomic ion transport; iron ion transport; copper ion import; iron import into cell; fat cell differentiation; protein homotrimerization; iron ion import across cell outer membrane	Golgi membrane; nucleoplasm; endosome; Golgi apparatus; plasma membrane; membrane; early endosome membrane	cupric reductase (NADH) activity; electron transfer activity; oxidoreductase activity; heme binding; metal ion binding; ferric-chelate reductase (NADPH) activity; FAD binding
1700029J07Rik	31.5299	-0.269948	0.125192	-2.15627	0.0310628	0.204627		ENSMUSG00000071103.9
Gm43759	36.7649	-0.26959	0.123718	-2.17907	0.0293265	0.199203		ENSMUSG00000105368.1		ENSMUSG00000105368
4921513D11Rik	34.412	-0.268499	0.152297	-1.763	0.0779008	0.330441		ENSMUSG00000066944.1
Prg4	1819.55	-0.268232	0.0757079	-3.54298	0.00039563	0.0127713	proteoglycan 4 (megakaryocyte stimulating factor, articular superficial zone protein)	ENSMUSG00000006014.16	96875	ENSMUSG00000006014		immune response; vesicle-mediated transport; negative regulation of interleukin-6 production; regulation of cell population proliferation; hematopoietic stem cell proliferation	extracellular region; extracellular space; extracellular matrix	scavenger receptor activity; polysaccharide binding
Mustn1	94.0101	-0.268173	0.11043	-2.42844	0.015164	0.135437	musculoskeletal, embryonic nuclear protein 1	ENSMUSG00000042485.6	66175	ENSMUSG00000042485		chondrocyte differentiation; muscle organ development; positive regulation of gene expression; embryonic limb morphogenesis; positive regulation of chondrocyte differentiation; chondrocyte proliferation; tissue regeneration; glucose homeostasis; positive regulation of myoblast differentiation; cartilage development; positive regulation of proteoglycan biosynthetic process; positive regulation of …	extracellular region; nucleus; nucleoplasm; cytoplasm	molecular_function
Bcam	154.069	-0.268159	0.121632	-2.20467	0.0274771	0.190556	basal cell adhesion molecule	ENSMUSG00000002980.14	57278	ENSMUSG00000002980		angiogenesis; cell adhesion; cell-matrix adhesion	plasma membrane; cell surface; membrane	laminin receptor activity; laminin binding
Ptar1	14.3949	-0.267712	0.13417	-1.99531	0.046009	0.253163	protein prenyltransferase alpha subunit repeat containing 1	ENSMUSG00000074925.3	72351	ENSMUSG00000074925			cytoplasm	prenyltransferase activity; Rab geranylgeranyltransferase activity; protein prenyltransferase activity
Grem2	418.193	-0.267332	0.126163	-2.11893	0.0340962	0.214414	gremlin 2, DAN family BMP antagonist	ENSMUSG00000050069.3	23893	ENSMUSG00000050069	TGF-beta signaling pathway	regulation of signal transduction; embryonic body morphogenesis; cytokine-mediated signaling pathway; negative regulation of BMP signaling pathway; sequestering of BMP from receptor via BMP binding; determination of dorsal identity; regulation of cytokine activity	extracellular region; extracellular space	cytokine activity; heparin binding; BMP binding; identical protein binding; receptor ligand activity
Msl3l2	35.6459	-0.267225	0.129259	-2.06736	0.0387	0.230043	MSL3 like 2	ENSMUSG00000047669.7	73390	ENSMUSG00000047669		chromatin organization; regulation of DNA-templated transcription	nucleus; NuA4 histone acetyltransferase complex; MSL complex	DNA binding; histone H4K16ac reader activity; histone reader activity
Il17re	13.6874	-0.266965	0.159062	-1.67837	0.0932739	0.361317	interleukin 17 receptor E	ENSMUSG00000043088.16	57890	ENSMUSG00000043088	Cytokine-cytokine receptor interaction; IL-17 signaling pathway	inflammatory response; cytokine-mediated signaling pathway	extracellular region; cytoplasm; plasma membrane; membrane	protein binding; interleukin-17 receptor activity
Thbd	99.0559	-0.266864	0.129004	-2.06865	0.038579	0.229858	thrombomodulin	ENSMUSG00000074743.4	21824	ENSMUSG00000074743	Complement and coagulation cascades; AGE-RAGE signaling pathway in diabetic complications; Fluid shear stress and atherosclerosis	female pregnancy; blood coagulation; hemostasis; response to X-ray; negative regulation of blood coagulation; response to lipopolysaccharide; negative regulation of coagulation; response to cAMP	extracellular space; vacuolar membrane; plasma membrane; external side of plasma membrane; cell surface; membrane; apicolateral plasma membrane; serine-type endopeptidase complex	transmembrane signaling receptor activity; calcium ion binding; signaling receptor activity
BC049762	14.1673	-0.266742	0.148324	-1.79838	0.0721173	0.317251		ENSMUSG00000045942.12
Dct	115.447	-0.266735	0.217697	-1.22526	0.220477	0.552497	dopachrome tautomerase	ENSMUSG00000022129.3	13190	ENSMUSG00000022129	Tyrosine metabolism; Metabolic pathways; Melanogenesis	positive regulation of neuroblast proliferation; melanin biosynthetic process from tyrosine; response to blue light; ventricular zone neuroblast division; melanin biosynthetic process; pigmentation; developmental pigmentation; cell development	cytoplasm; cytosol; plasma membrane; membrane; melanosome membrane; melanosome	dopachrome isomerase activity; oxidoreductase activity; isomerase activity; metal ion binding
Fendrr	169.572	-0.266617	0.0591466	-4.50774	6.55211e-06	0.000822533	Foxf1 adjacent non-coding developmental regulatory RNA	ENSMUSG00000097336.8	68790	ENSMUSG00000097336
Ror1	101.053	-0.266617	0.0889479	-2.99745	0.0027225	0.0473077	receptor tyrosine kinase-like orphan receptor 1	ENSMUSG00000035305.5	26563	ENSMUSG00000035305	Wnt signaling pathway	sensory perception of sound; cell population proliferation; astrocyte development; Wnt signaling pathway; positive regulation of canonical NF-kappaB signal transduction; inner ear development; positive regulation of NF-kappaB transcription factor activity	stress fiber; plasma membrane; cell surface; membrane; axon; cell projection; receptor complex; axon terminus	nucleotide binding; protein kinase activity; transmembrane receptor protein tyrosine kinase activity; ATP binding; Wnt-protein binding; signaling receptor activity; Wnt receptor activity
Kcnq1ot1	35.9675	-0.266348	0.11199	-2.37831	0.017392	0.146198	KCNQ1 overlapping transcript 1	ENSMUSG00000101609.1	63830	ENSMUSG00000101609		gene expression; cell migration; osteoblast proliferation; negative regulation of gene expression via chromosomal CpG island methylation; genomic imprinting; apoptotic process involved in development		chromatin binding; protein binding; miRNA binding; protein-containing complex binding
Gm25911	42.1756	-0.26633	0.128608	-2.07086	0.0383719	0.229089		ENSMUSG00000088246.1
Slc6a8	225.527	-0.266175	0.102279	-2.60244	0.0092562	0.101781	solute carrier family 6 (neurotransmitter transporter, creatine), member 8	ENSMUSG00000019558.14	102857	ENSMUSG00000019558		monoatomic ion transport; sodium ion transport; neurotransmitter transport; amino acid transport; gamma-aminobutyric acid transport; creatine transmembrane transport; protein catabolic process; sodium ion transmembrane transport	plasma membrane; membrane; apical plasma membrane; synapse; postsynaptic membrane; glutamatergic synapse	creatine transmembrane transporter activity; creatine:sodium symporter activity; gamma-aminobutyric acid:sodium:chloride symporter activity; choline transmembrane transporter activity; symporter activity
Car1	162.784	-0.266104	0.142062	-1.87315	0.0610478	0.290927	carbonic anhydrase 1	ENSMUSG00000027556.15	12346	ENSMUSG00000027556	Nitrogen metabolism; Metabolic pathways	response to fructose	cytoplasm	arylesterase activity; carbonate dehydratase activity; zinc ion binding; lyase activity; hydro-lyase activity; cyanamide hydratase activity; metal ion binding
Gm11696	15.1312	-0.265586	0.124777	-2.12848	0.0332972	0.212045	predicted gene 11696	ENSMUSG00000056687.9	100036768	ENSMUSG00000056687
Slamf7	15.5616	-0.265556	0.194275	-1.36691	0.171654	0.491404	SLAM family member 7	ENSMUSG00000038179.13	75345	ENSMUSG00000038179	IgSF CAM signaling	adaptive immune response; immune system process; immune response; regulation of natural killer cell activation; T cell activation; innate immune response	plasma membrane; external side of plasma membrane; membrane	protein binding; identical protein binding
Ms4a6c	17.1007	-0.265297	0.200815	-1.3211	0.186468	0.510116	membrane-spanning 4-domains, subfamily A, member 6C	ENSMUSG00000079419.4	73656	ENSMUSG00000079419		cell surface receptor signaling pathway	trans-Golgi network; plasma membrane; membrane
Gm9762	14.736	-0.264837	0.129349	-2.04747	0.0406124	0.237747	ubiquitin-conjugating enzyme E2D 2 pseudogene	ENSMUSG00000037096.6	100041766	ENSMUSG00000037096
Gm6055	20.5753	-0.263825	0.125242	-2.10653	0.0351586	0.217202	microtubule-associated protein 1 light chain 3 pseudogene 2	ENSMUSG00000062081.6	606520	ENSMUSG00000062081
Sult1a1	9296.83	-0.263666	0.0703255	-3.74922	0.000177388	0.00761083	sulfotransferase family 1A, phenol-preferring, member 1	ENSMUSG00000030711.15	20887	ENSMUSG00000030711	Chemical carcinogenesis - DNA adducts	catecholamine metabolic process; lipid metabolic process; xenobiotic metabolic process; steroid metabolic process; estrogen metabolic process; 4-nitrophenol metabolic process; thyroid hormone metabolic process; dopamine catabolic process; response to glucocorticoid; sulfation	cytoplasm; cytosol	nucleotide binding; aryl sulfotransferase activity; sulfotransferase activity; transferase activity; identical protein binding; sulfate binding; amine sulfotransferase activity; flavonol 3-sulfotransferase activity; steroid sulfotransferase activity; 3'-phosphoadenosine 5'-phosphosulfate binding
Tmem200b	46.8934	-0.263524	0.107419	-2.45323	0.014158	0.129001	transmembrane protein 200B	ENSMUSG00000070720.3	623230	ENSMUSG00000070720		biological_process	cellular_component; membrane	molecular_function
F730311O21Rik	15.4539	-0.263038	0.186698	-1.40889	0.158866	0.47266	RIKEN cDNA F730311O21 gene	ENSMUSG00000100658.1	622304	ENSMUSG00000100658		biological_process	cellular_component	molecular_function
Ccdc88c	52.2183	-0.261669	0.11009	-2.37687	0.0174601	0.146397	coiled-coil domain containing 88C	ENSMUSG00000021182.14	68339	ENSMUSG00000021182	Wnt signaling pathway	microtubule bundle formation; cilium movement; apical constriction; negative regulation of microtubule depolymerization; signal transduction; small GTPase-mediated signal transduction; Wnt signaling pathway; cytoskeleton-dependent intracellular transport; cytoplasmic microtubule organization; protein destabilization; non-canonical Wnt signaling pathway; cilium organization; positive regulation of…	extracellular region; cytoplasm; centrosome; cytosol; cell junction; apical junction complex; anchoring junction	G-protein alpha-subunit binding; guanyl-nucleotide exchange factor activity; frizzled binding; protein binding; microtubule binding; PDZ domain binding; protein dimerization activity; dynein light intermediate chain binding
Golt1a	70.148	-0.261494	0.0837069	-3.12392	0.00178459	0.0358452	golgi transport 1A	ENSMUSG00000103421.1	68338	ENSMUSG00000103421		endoplasmic reticulum to Golgi vesicle-mediated transport; protein transport; vesicle-mediated transport; retrograde transport, endosome to Golgi	Golgi cis cisterna; Golgi membrane; nuclear envelope; cytoplasm; endoplasmic reticulum; Golgi apparatus; trans-Golgi network; cytosol; endomembrane system; membrane
Slc23a1	2316.2	-0.261378	0.0910702	-2.87007	0.00410377	0.0627271	solute carrier family 23 (nucleobase transporters), member 1	ENSMUSG00000024354.11	20522	ENSMUSG00000024354	Vitamin digestion and absorption	monoatomic ion transport; sodium ion transport; brain development; response to toxic substance; urate transport; L-ascorbic acid transmembrane transport; lung development; sodium ion transmembrane transport; transmembrane transport; dehydroascorbic acid transport	cytoplasm; plasma membrane; brush border; basal plasma membrane; membrane; apical plasma membrane; intracellular organelle	L-ascorbate:sodium symporter activity; sodium ion transmembrane transporter activity; urate transmembrane transporter activity; L-ascorbic acid transmembrane transporter activity; symporter activity; transmembrane transporter activity; dehydroascorbic acid transmembrane transporter activity
Atad5	35.1618	-0.261378	0.109322	-2.3909	0.0168073	0.143136	ATPase family, AAA domain containing 5	ENSMUSG00000017550.14	237877	ENSMUSG00000017550		DNA damage response; cell population proliferation; intrinsic apoptotic signaling pathway in response to DNA damage; positive regulation of B cell proliferation; nuclear DNA replication; signal transduction in response to DNA damage; intrinsic apoptotic signaling pathway in response to DNA damage by p53 class mediator; isotype switching; positive regulation of DNA replication; positive regulation…	nucleus; Elg1 RFC-like complex	nucleotide binding; DNA binding; protein binding; ATP binding; ATP hydrolysis activity; DNA clamp unloader activity
Serpina12	1908.38	-0.261347	0.177836	-1.46959	0.141671	0.447877	serine (or cysteine) peptidase inhibitor, clade A (alpha-1 antiproteinase, antitrypsin), member 12	ENSMUSG00000041567.3	68054	ENSMUSG00000041567		negative regulation of gluconeogenesis; positive regulation of insulin receptor signaling pathway; negative regulation of lipid biosynthetic process; positive regulation of phosphatidylinositol 3-kinase/protein kinase B signal transduction; regulation of cholesterol metabolic process; regulation of triglyceride metabolic process	extracellular region; extracellular space; plasma membrane	serine-type endopeptidase inhibitor activity; protein binding; peptidase inhibitor activity; molecular function inhibitor activity
Rnd1	202.169	-0.261116	0.123382	-2.11633	0.0343168	0.214805	Rho family GTPase 1	ENSMUSG00000054855.13	223881	ENSMUSG00000054855	Axon guidance	actin filament organization; negative regulation of cell adhesion; signal transduction; small GTPase-mediated signal transduction; neuron remodeling; regulation of actin cytoskeleton organization	cytoplasm; cytosol; cytoskeleton; plasma membrane; adherens junction; actin cytoskeleton; membrane	nucleotide binding; GTPase activity; signaling receptor binding; GTP binding; protein kinase binding
Eaf2	14.4642	-0.260688	0.157296	-1.65731	0.097457	0.370098	ELL associated factor 2	ENSMUSG00000022838.13	106389	ENSMUSG00000022838		transcription elongation by RNA polymerase II; negative regulation of cell growth; regulation of transcription elongation by RNA polymerase II; positive regulation of DNA-templated transcription; positive regulation of transcription by RNA polymerase II; negative regulation of epithelial cell proliferation involved in prostate gland development; intrinsic apoptotic signaling pathway	nucleus; nucleoplasm; transcription elongation factor complex; nuclear speck; super elongation complex	transcription elongation factor activity; protein binding
Hhex	2065.57	-0.26057	0.164885	-1.58031	0.114036	0.403574	hematopoietically expressed homeobox	ENSMUSG00000024986.11	15242	ENSMUSG00000024986	Maturity onset diabetes of the young; Transcriptional misregulation in cancer	negative regulation of transcription by RNA polymerase II; vasculogenesis; in utero embryonic development; liver development; morphogenesis of an epithelium; myeloid leukocyte differentiation; regulation of DNA-templated transcription; regulation of transcription by RNA polymerase II; signal transduction; Notch signaling pathway; endoderm development; animal organ morphogenesis; anterior/posterio…	nucleus; cytoplasm; nuclear body; protein-DNA complex	transcription cis-regulatory region binding; RNA polymerase II transcription regulatory region sequence-specific DNA binding; RNA polymerase II cis-regulatory region sequence-specific DNA binding; DNA-binding transcription factor activity, RNA polymerase II-specific; DNA-binding transcription repressor activity, RNA polymerase II-specific; DNA-binding transcription activator activity, RNA polymer…
Pdia5	1476.68	-0.260491	0.0875892	-2.97401	0.00293938	0.0501285	protein disulfide isomerase associated 5	ENSMUSG00000022844.7	72599	ENSMUSG00000022844		protein folding	endoplasmic reticulum; endoplasmic reticulum lumen	protein disulfide isomerase activity; protein-disulfide reductase activity; isomerase activity
Mtcl1	14.8618	-0.260332	0.162378	-1.60325	0.10888	0.393987	microtubule crosslinking factor 1	ENSMUSG00000052105.16	68617	ENSMUSG00000052105		microtubule bundle formation; chromosome segregation; regulation of autophagy; establishment or maintenance of epithelial cell apical/basal polarity; cell division; positive regulation of protein targeting to membrane	kinetochore; spindle pole; extracellular space; cytoplasm; cytoskeleton; spindle microtubule; plasma membrane; membrane; apical plasma membrane; apicolateral plasma membrane; lateral plasma membrane; midbody; microtubule bundle	protein binding; microtubule binding; protein homodimerization activity
Foxa2	999.676	-0.260142	0.125288	-2.07635	0.0378618	0.227238	forkhead box A2	ENSMUSG00000037025.11	15376	ENSMUSG00000037025	Longevity regulating pathway - multiple species; Maturity onset diabetes of the young	negative regulation of transcription by RNA polymerase II; in utero embryonic development; ectoderm formation; cell fate specification; chromatin organization; regulation of DNA-templated transcription; regulation of transcription by RNA polymerase II; Notch signaling pathway; pattern specification process; adult locomotory behavior; anatomical structure morphogenesis; anterior/posterior pattern …	nucleus; nucleoplasm; transcription regulator complex; cytoplasm; cell junction	transcription cis-regulatory region binding; RNA polymerase II cis-regulatory region sequence-specific DNA binding; DNA-binding transcription factor activity, RNA polymerase II-specific; DNA-binding transcription repressor activity, RNA polymerase II-specific; DNA-binding transcription activator activity, RNA polymerase II-specific; nucleic acid binding; DNA binding; chromatin binding; double-str…
Lxn	16.3573	-0.259928	0.141836	-1.83259	0.066863	0.30518	latexin	ENSMUSG00000047557.2	17035	ENSMUSG00000047557		inflammatory response; detection of temperature stimulus involved in sensory perception of pain	extracellular space; cytoplasm	enzyme inhibitor activity; metalloendopeptidase inhibitor activity; heparin binding; peptidase inhibitor activity
Zfp955b	76.444	-0.259786	0.0826379	-3.14367	0.00166846	0.0342224	zinc finger protein 955B	ENSMUSG00000096910.1	100043468	ENSMUSG00000096910		negative regulation of transcription by RNA polymerase II; regulation of DNA-templated transcription; regulation of transcription by RNA polymerase II	nucleus	RNA polymerase II transcription regulatory region sequence-specific DNA binding; DNA-binding transcription factor activity, RNA polymerase II-specific; DNA binding; zinc ion binding; metal ion binding
Abtb2	208.554	-0.259663	0.0812176	-3.19713	0.00138805	0.0302082	ankyrin repeat and BTB domain containing 2	ENSMUSG00000032724.5	99382	ENSMUSG00000032724		cellular response to toxic substance		protein heterodimerization activity
Gm10031	15.8985	-0.259638	0.134267	-1.93375	0.0531442	0.272521		ENSMUSG00000101523.1
A530013C23Rik	21.1045	-0.259174	0.150729	-1.71947	0.0855296	0.347085	RIKEN cDNA A530013C23 gene	ENSMUSG00000006462.6	329562	ENSMUSG00000006462
Gm15746	85.6499	-0.259132	0.101366	-2.55639	0.0105764	0.109713	predicted gene 15746	ENSMUSG00000081988.1	100416761	ENSMUSG00000081988
Tgfb3	35.6436	-0.258778	0.158245	-1.63529	0.101988	0.379396	transforming growth factor, beta 3	ENSMUSG00000021253.6	21809	ENSMUSG00000021253	MAPK signaling pathway; Cytokine-cytokine receptor interaction; FoxO signaling pathway; Cell cycle; Cellular senescence; TGF-beta signaling pathway; Hippo signaling pathway; AGE-RAGE signaling pathway in diabetic complications; Leishmaniasis; Chagas disease; Malaria; Toxoplasmosis; Amoebiasis; Tuberculosis; Hepatitis B; Human T-cell leukemia virus 1 infection; Pathways in cancer; Colorectal cance…	response to hypoxia; in utero embryonic development; transforming growth factor beta receptor signaling pathway; salivary gland morphogenesis; heart development; positive regulation of cell population proliferation; negative regulation of cell population proliferation; animal organ morphogenesis; gene expression; positive regulation of gene expression; positive regulation of epithelial to mesench…	extracellular region; extracellular space; cell surface; secretory granule; T-tubule; extracellular matrix; neuronal cell body	type II transforming growth factor beta receptor binding; cytokine activity; transforming growth factor beta receptor binding; protein binding; growth factor activity; type I transforming growth factor beta receptor binding; type III transforming growth factor beta receptor binding; identical protein binding; protein-containing complex binding; transforming growth factor beta binding
Gpr35	14.1377	-0.258623	0.183412	-1.41007	0.15852	0.471939	G protein-coupled receptor 35	ENSMUSG00000026271.15	64095	ENSMUSG00000026271	Neuroactive ligand-receptor interaction	monocyte chemotaxis; cytoskeleton organization; signal transduction; G protein-coupled receptor signaling pathway; adenylate cyclase-inhibiting G protein-coupled receptor signaling pathway; positive regulation of cytosolic calcium ion concentration; neutrophil chemotaxis; macrophage chemotaxis; leukocyte adhesion to vascular endothelial cell; chemokine-mediated signaling pathway; negative regulat…	plasma membrane; membrane	G protein-coupled receptor activity; chemokine receptor activity; C-X-C chemokine receptor activity
Lmod1	17.6528	-0.258601	0.202667	-1.27599	0.20196	0.529935	leiomodin 1 (smooth muscle)	ENSMUSG00000048096.7	93689	ENSMUSG00000048096	Cytoskeleton in muscle cells	muscle contraction; actin filament organization; myofibril assembly; positive regulation of actin filament polymerization; actin nucleation; pointed-end actin filament capping	cytoplasm; cytosol; cytoskeleton; striated muscle thin filament; actin filament; myofibril; sarcomere	actin binding; tropomyosin binding
Hmgcr	3560.96	-0.257871	0.145081	-1.77743	0.0754981	0.324541	3-hydroxy-3-methylglutaryl-Coenzyme A reductase	ENSMUSG00000021670.14	15357	ENSMUSG00000021670	Terpenoid backbone biosynthesis; Metabolic pathways; AMPK signaling pathway; Bile secretion	lipid metabolic process; steroid biosynthetic process; cholesterol biosynthetic process; ubiquinone metabolic process; steroid metabolic process; cholesterol metabolic process; positive regulation of cell population proliferation; isoprenoid biosynthetic process; visual learning; negative regulation of striated muscle cell apoptotic process; positive regulation of cardiac muscle cell apoptotic pr…	peroxisome; peroxisomal membrane; endoplasmic reticulum; endoplasmic reticulum membrane; membrane; cytoplasmic side of endoplasmic reticulum membrane	hydroxymethylglutaryl-CoA reductase (NADPH) activity; oxidoreductase activity; oxidoreductase activity, acting on the CH-OH group of donors, NAD or NADP as acceptor; GTPase regulator activity; identical protein binding; NADP binding; protein phosphatase 2A binding; NADPH binding; coenzyme A binding
Scd1	301648	-0.257495	0.211358	-1.21829	0.223115	0.555248	stearoyl-Coenzyme A desaturase 1	ENSMUSG00000037071.2	20249	ENSMUSG00000037071	Biosynthesis of unsaturated fatty acids; Metabolic pathways; Fatty acid metabolism; PPAR signaling pathway; AMPK signaling pathway; Alcoholic liver disease	lipid metabolic process; fatty acid metabolic process; fatty acid biosynthetic process; unsaturated fatty acid biosynthetic process; triglyceride metabolic process; response to nutrient; lipid biosynthetic process; response to bacterium; cholesterol homeostasis; sebaceous gland development; defense response to Gram-positive bacterium; white fat cell differentiation; brown fat cell differentiation…	nucleolus; endoplasmic reticulum; endoplasmic reticulum membrane; membrane	stearoyl-CoA 9-desaturase activity; iron ion binding; oxidoreductase activity; oxidoreductase activity, acting on paired donors, with oxidation of a pair of donors resulting in the reduction of molecular oxygen to two molecules of water; palmitoyl-CoA 9-desaturase activity; metal ion binding
Dact2	327.19	-0.257058	0.0927574	-2.77129	0.00558341	0.0750991	dishevelled-binding antagonist of beta-catenin 2	ENSMUSG00000048826.6	240025	ENSMUSG00000048826		hematopoietic progenitor cell differentiation; epithelial cell morphogenesis; negative regulation of cell adhesion; skin development; inner medullary collecting duct development; negative regulation of nodal signaling pathway	cytoplasm; mitochondrion	protein kinase C binding; protein binding; beta-catenin binding; transcription factor binding; protein kinase A binding; delta-catenin binding
Zfp445	488.784	-0.256359	0.176688	-1.45091	0.146805	0.455357	zinc finger protein 445	ENSMUSG00000047036.7	235682	ENSMUSG00000047036		regulation of DNA-templated transcription; regulation of transcription by RNA polymerase II; negative regulation of gene expression via chromosomal CpG island methylation; epigenetic programing of female pronucleus	nucleus	DNA binding; chromatin binding; zinc ion binding; double-stranded methylated DNA binding; metal ion binding
Lynx1	34.9428	-0.256341	0.125573	-2.04137	0.041214	0.239101	Ly6/neurotoxin 1	ENSMUSG00000022594.14	23936	ENSMUSG00000022594	Neuroactive ligand-receptor interaction	synaptic transmission, cholinergic; acetylcholine receptor signaling pathway; regulation of neurotransmitter receptor activity	endoplasmic reticulum; plasma membrane; membrane; dendrite; cell projection; synapse; side of membrane	protein binding; ion channel inhibitor activity; acetylcholine receptor regulator activity; acetylcholine receptor inhibitor activity; acetylcholine receptor binding
Zmiz1os1	16.4464	-0.256114	0.149893	-1.70865	0.0875157	0.349773	Zmiz1 opposite strand 1	ENSMUSG00000087535.1	414118	ENSMUSG00000087535
Piezo2	27.6305	-0.256053	0.126963	-2.01675	0.0437212	0.246382	piezo-type mechanosensitive ion channel component 2	ENSMUSG00000041482.16	667742	ENSMUSG00000041482		monoatomic ion transport; monoatomic cation transport; response to mechanical stimulus; monoatomic ion transmembrane transport; regulation of membrane potential; detection of mechanical stimulus involved in sensory perception; detection of mechanical stimulus; cellular response to mechanical stimulus; monoatomic cation transmembrane transport	plasma membrane; membrane; stereocilium; cuticular plate; neuronal cell body membrane	monoatomic cation channel activity; protein binding; mechanosensitive monoatomic ion channel activity; mechanosensitive monoatomic cation channel activity
Zbp1	192.352	-0.255926	0.158336	-1.61635	0.106019	0.387651	Z-DNA binding protein 1	ENSMUSG00000027514.14	58203	ENSMUSG00000027514	Necroptosis; Cytosolic DNA-sensing pathway	activation of innate immune response; immune system process; apoptotic process; programmed cell death; positive regulation of apoptotic process; innate immune response; regulation of inflammatory response; positive regulation of inflammatory response; defense response to fungus; defense response to virus; positive regulation of type I interferon-mediated signaling pathway; positive regulation of …	nucleus; cytoplasm; cytosol	DNA binding; left-handed Z-DNA binding; RNA binding; double-stranded RNA binding; double-stranded RNA adenosine deaminase activity; protein binding; identical protein binding
Gm17022	22.8853	-0.255395	0.148859	-1.71569	0.0862193	0.347526		ENSMUSG00000091784.2		ENSMUSG00000091784
Ifitm2	1638.74	-0.255389	0.0864485	-2.95424	0.00313442	0.0522712	interferon induced transmembrane protein 2	ENSMUSG00000060591.9	80876	ENSMUSG00000060591		immune system process; response to virus; response to type II interferon; response to interferon-alpha; response to interferon-beta; cellular response to interferon-beta; negative regulation of viral genome replication; innate immune response; host-mediated suppression of symbiont invasion; defense response to virus; type I interferon-mediated signaling pathway	lysosome; lysosomal membrane; endosome; plasma membrane; membrane; early endosome membrane; late endosome membrane; protein-containing complex	molecular_function
Lama5	169.42	-0.255285	0.064278	-3.97157	7.14001e-05	0.00411933	laminin, alpha 5	ENSMUSG00000015647.9	16776	ENSMUSG00000015647	PI3K-Akt signaling pathway; Cornified envelope formation; Focal adhesion; ECM-receptor interaction; Toxoplasmosis; Amoebiasis; Human papillomavirus infection; Pathways in cancer; Small cell lung cancer	branching involved in ureteric bud morphogenesis; morphogenesis of a polarized epithelium; neural crest cell migration; kidney development; hair follicle development; cell adhesion; integrin-mediated signaling pathway; axon guidance; muscle organ development; animal organ morphogenesis; tissue development; morphogenesis of embryonic epithelium; cell migration; regulation of cell adhesion; lung de…	extracellular region; basement membrane; laminin-5 complex; extracellular space; extracellular matrix; neuromuscular junction; synaptic cleft; laminin-10 complex; synapse; extracellular matrix of synaptic cleft; glutamatergic synapse	signaling receptor binding; integrin binding; extracellular matrix structural constituent; protein binding; receptor ligand activity; cell adhesion mediator activity
H2-Q5	200.954	-0.255205	0.104832	-2.43443	0.0149153	0.133922	histocompatibility 2, Q region locus 5	ENSMUSG00000055413.12	15016	ENSMUSG00000055413
Spon1	30.0024	-0.254683	0.188325	-1.35236	0.176261	0.496693	spondin 1, (f-spondin) extracellular matrix protein	ENSMUSG00000038156.16	233744	ENSMUSG00000038156		cell adhesion; positive regulation of protein processing; negative regulation of amyloid-beta formation; positive regulation of amyloid precursor protein catabolic process	extracellular region; extracellular matrix	extracellular matrix structural constituent; protein binding; metal ion binding; LBD domain binding
D930015M05Rik	13.4888	-0.25447	0.230644	-1.1033	0.269896	0.602429	RIKEN cDNA D930015M05 gene	ENSMUSG00000084781.1	320507	ENSMUSG00000084781		biological_process	cellular_component	molecular_function
Cpd	681.504	-0.25427	0.0642586	-3.95698	7.59027e-05	0.00425725	carboxypeptidase D	ENSMUSG00000020841.5	12874	ENSMUSG00000020841		proteolysis; peptide metabolic process; protein processing	extracellular space; nucleus; trans-Golgi network; plasma membrane; membrane; perinuclear region of cytoplasm	carboxypeptidase activity; metallocarboxypeptidase activity; peptidase activity; metallopeptidase activity; zinc ion binding; hydrolase activity; protein-containing complex binding; metal ion binding; protein phosphatase 2A binding
Zfp655	957.679	-0.25418	0.0758521	-3.35099	0.00080522	0.0206768	zinc finger protein 655	ENSMUSG00000007812.16	72611	ENSMUSG00000007812		regulation of transcription by RNA polymerase II; negative regulation of G1/S transition of mitotic cell cycle	nucleus; nucleolus; cytoplasm	RNA polymerase II cis-regulatory region sequence-specific DNA binding; DNA-binding transcription factor activity, RNA polymerase II-specific; zinc ion binding; metal ion binding
Sema4d	37.2685	-0.254028	0.168149	-1.51073	0.130858	0.433112	sema domain, immunoglobulin domain (Ig), transmembrane domain (TM) and short cytoplasmic domain, (semaphorin) 4D	ENSMUSG00000021451.15	20354	ENSMUSG00000021451	Axon guidance	negative regulation of transcription by RNA polymerase II; neural crest cell migration; positive regulation of protein phosphorylation; negative regulation of cell adhesion; nervous system development; axon guidance; regulation of cell shape; cell differentiation; positive regulation of cell migration; regulation of cell projection organization; positive regulation of Rho protein signal transduct…	semaphorin receptor complex; extracellular space; nucleoplasm; centrosome; plasma membrane; membrane; ciliary basal body; postsynaptic membrane; GABA-ergic synapse	transmembrane signaling receptor activity; signaling receptor binding; protein binding; semaphorin receptor binding; signaling receptor activity; neuropilin binding; identical protein binding; chemorepellent activity; receptor ligand activity
Akr1a1	11819	0.203825	0.0458983	4.4408	8.96259e-06	0.00102113	aldo-keto reductase family 1, member A1	ENSMUSG00000028692.14	58810	ENSMUSG00000028692	Glycolysis / Gluconeogenesis; Pentose and glucuronate interconversions; Ascorbate and aldarate metabolism; Glycerolipid metabolism; Pyruvate metabolism; Metabolic pathways; Biosynthesis of cofactors; Chemical carcinogenesis - reactive oxygen species	lipid metabolic process; D-glucuronate catabolic process to D-xylulose 5-phosphate; L-ascorbic acid biosynthetic process; D-glucuronate catabolic process; negative regulation of apoptotic process; daunorubicin metabolic process; doxorubicin metabolic process; aldehyde catabolic process; cellular detoxification of aldehyde	cytoplasm; cytosol; plasma membrane; membrane; apical plasma membrane; synapse	aldose reductase (NADPH) activity; alcohol dehydrogenase (NADP+) activity; oxidoreductase activity; allyl-alcohol dehydrogenase activity; L-glucuronate reductase activity; glucuronolactone reductase activity; glycerol dehydrogenase (NADP+) activity; S-nitrosoglutathione reductase (NADH) activity; S-nitrosoglutathione reductase (NADPH) activity; methylglyoxal reductase (NADPH) (acetol producing) a…
9430064I24Rik	33.3692	-0.253388	0.115246	-2.19867	0.0279013	0.192316	RIKEN cDNA 9430064I24 gene	ENSMUSG00000108402.1	100327266	ENSMUSG00000108402
Gm26981	18.8521	-0.25284	0.162354	-1.55734	0.11939	0.413351		ENSMUSG00000098041.1		ENSMUSG00000098041
Srcap	47.0033	-0.252727	0.170902	-1.47878	0.139198	0.444812	Snf2-related CREBBP activator protein	ENSMUSG00000053877.12	100043597	ENSMUSG00000053877	ATP-dependent chromatin remodeling	chromatin organization; chromatin remodeling; regulation of DNA-templated transcription; regulation of gene expression; positive regulation of macromolecule biosynthetic process; positive regulation of transcription by RNA polymerase II	nucleosome; Swr1 complex; nucleus; nucleoplasm; Golgi apparatus; nuclear body; protein-containing complex; perinuclear region of cytoplasm	nucleotide binding; DNA binding; transcription coactivator activity; helicase activity; ATP binding; hydrolase activity; ATP hydrolysis activity; histone binding; catalytic activity, acting on a protein
Gm44891	25.3692	-0.252503	0.148012	-1.70596	0.0880158	0.350713		ENSMUSG00000109555.1		ENSMUSG00000109555
Matk	12.9346	-0.25174	0.172846	-1.45644	0.145271	0.453822	megakaryocyte-associated tyrosine kinase	ENSMUSG00000004933.17	17179	ENSMUSG00000004933	Neurotrophin signaling pathway		cytoplasm; plasma membrane; membrane	nucleotide binding; protein kinase activity; protein tyrosine kinase activity; non-membrane spanning protein tyrosine kinase activity; ATP binding; kinase activity; transferase activity
Zfp580	24.7544	-0.251555	0.109109	-2.30554	0.0211365	0.1646	zinc finger protein 580	ENSMUSG00000055633.6	68992	ENSMUSG00000055633		positive regulation of endothelial cell proliferation; positive regulation of leukocyte chemotaxis; regulation of transcription by RNA polymerase II; chemotaxis; inflammatory response; positive regulation of endothelial cell migration; positive regulation of gene expression; positive regulation of interleukin-8 production; positive regulation of transcription by RNA polymerase II; cellular respon…	nucleus; nucleoplasm	RNA polymerase II cis-regulatory region sequence-specific DNA binding; DNA-binding transcription activator activity, RNA polymerase II-specific; DNA binding; zinc ion binding; metal ion binding; sequence-specific double-stranded DNA binding
Evc	54.6371	-0.251551	0.122016	-2.06163	0.0392433	0.231638	EvC ciliary complex subunit 1	ENSMUSG00000029122.11	59056	ENSMUSG00000029122	Hedgehog signaling pathway	endochondral bone growth; smoothened signaling pathway; positive regulation of smoothened signaling pathway; cartilage development	cytoplasm; cytoskeleton; plasma membrane; cilium; membrane; ciliary basal body; cell projection; ciliary membrane; plasma membrane protein complex	protein binding
Pcm1	379.347	-0.251463	0.0829481	-3.03157	0.00243288	0.0439677	pericentriolar material 1	ENSMUSG00000031592.10	18536	ENSMUSG00000031592		neuron migration; centrosome cycle; interkinetic nuclear migration; cell projection organization; cytoplasmic microtubule organization; microtubule anchoring; microtubule anchoring at centrosome; social behavior; intraciliary transport involved in cilium assembly; negative regulation of neurogenesis; cilium assembly; regulation of protein complex stability; protein localization to centrosome; pos…	pericentriolar material; nucleoplasm; cytoplasm; centrosome; centriole; cytosol; cytoskeleton; cilium; microtubule cytoskeleton; nuclear membrane; protein-containing complex; centriolar satellite; ciliary transition zone; ciliary basal body; cell projection; apical part of cell	protein binding; molecular adaptor activity
Fam234b	1116.68	-0.251444	0.101491	-2.47751	0.0132304	0.123623	family with sequence similarity 234, member B	ENSMUSG00000030207.15	74525	ENSMUSG00000030207		biological_process	cellular_component; cytoplasm; Golgi apparatus; microtubule organizing center; cytoskeleton; membrane	molecular_function
Irak3	30.8603	-0.251013	0.193439	-1.29763	0.194413	0.519381	interleukin-1 receptor-associated kinase 3	ENSMUSG00000020227.10	73914	ENSMUSG00000020227	Neurotrophin signaling pathway	positive regulation of cytokine production; negative regulation of cytokine-mediated signaling pathway; positive regulation of immune system process; protein phosphorylation; apoptotic process; signal transduction; Toll signaling pathway; response to virus; positive regulation of macrophage tolerance induction; negative regulation of macrophage cytokine production; cytokine-mediated signaling pat…	nucleus; cytoplasm; plasma membrane	nucleotide binding; magnesium ion binding; protein kinase activity; protein serine/threonine kinase activity; protein binding; ATP binding; protein kinase binding; protein homodimerization activity; protein heterodimerization activity
Trim14	483.293	-0.250036	0.0816356	-3.06283	0.00219253	0.0412866	tripartite motif-containing 14	ENSMUSG00000039853.18	74735	ENSMUSG00000039853		immune system process; inflammatory response; negative regulation of viral transcription; innate immune response; positive regulation of DNA-templated transcription; protein K48-linked deubiquitination	cytoplasm; mitochondrion; mitochondrial outer membrane; membrane; cytoplasmic vesicle; phagocytic vesicle	transcription coactivator activity; zinc ion binding; metal ion binding; molecular adaptor activity; ubiquitin protein ligase activity
Hapln4	222.115	-0.250029	0.110198	-2.2689	0.0232744	0.173286	hyaluronan and proteoglycan link protein 4	ENSMUSG00000007594.9	330790	ENSMUSG00000007594		skeletal system development; cell adhesion; central nervous system development; synaptic transmission, GABAergic; inhibitory synapse assembly	extracellular region; extracellular space; extracellular matrix; synapse; perineuronal net	hyaluronic acid binding; structural constituent of synapse-associated extracellular matrix
Haus8	161.551	-0.249894	0.153117	-1.63204	0.10267	0.380568	4HAUS augmin-like complex, subunit 8	ENSMUSG00000035439.13	76478	ENSMUSG00000035439		centrosome cycle; spindle assembly; cell division	spindle pole; cytoplasm; centrosome; spindle; cytoskeleton; microtubule; nuclear microtubule; HAUS complex; mitotic spindle microtubule	microtubule binding
Wdr45b	1058.23	-0.249803	0.0731864	-3.41325	0.000641934	0.0180567	WD repeat domain 45B	ENSMUSG00000025173.13	66840	ENSMUSG00000025173	Autophagy - animal	autophagosome assembly; autophagy of mitochondrion; pexophagy; autophagy; cellular response to starvation; protein localization to phagophore assembly site; nucleophagy; glycophagy	phagophore assembly site; lysosome; cytosol; phagophore assembly site membrane	lipid binding; protein-macromolecule adaptor activity; phosphatidylinositol-3-phosphate binding; TSC1-TSC2 complex binding; phosphatidylinositol-3,5-bisphosphate binding
Pspc1	214.59	-0.249733	0.0655091	-3.81219	0.00013774	0.00633042	paraspeckle protein 1	ENSMUSG00000021938.11	66645	ENSMUSG00000021938		activation of innate immune response; immune system process; regulation of DNA-templated transcription; regulation of circadian rhythm; innate immune response; negative regulation of DNA-templated transcription; rhythmic process; membraneless organelle assembly	fibrillar center; nucleus; nucleoplasm; nucleolus; cytoplasm; nuclear matrix; nuclear speck; paraspeckles	nucleic acid binding; RNA binding; protein binding
Rgag4	24.4567	-0.249515	0.136494	-1.82803	0.0675457	0.30618		ENSMUSG00000049191.12
Zfp612	167.965	-0.249463	0.0988899	-2.52263	0.011648	0.115021	zinc finger protein 612	ENSMUSG00000044676.9	234725	ENSMUSG00000044676		regulation of transcription by RNA polymerase II	nucleus	RNA polymerase II cis-regulatory region sequence-specific DNA binding; DNA-binding transcription factor activity, RNA polymerase II-specific
Ltbp3	120.298	-0.249033	0.109146	-2.28165	0.0225102	0.170441	latent transforming growth factor beta binding protein 3	ENSMUSG00000024940.10	16998	ENSMUSG00000024940		skeletal system development; transforming growth factor beta receptor signaling pathway; negative regulation of bone mineralization; negative regulation of chondrocyte differentiation; regulation of cell differentiation; positive regulation of bone resorption; bone remodeling; lung alveolus development; bone morphogenesis; lung saccule development; positive regulation of mesenchymal stem cell pro…	extracellular region; extracellular matrix	calcium ion binding; growth factor binding; transforming growth factor beta binding
Tmtc1	46.6958	-0.248607	0.122043	-2.03705	0.0416448	0.240416	transmembrane and tetratricopeptide repeat containing 1	ENSMUSG00000030306.14	387314	ENSMUSG00000030306		RNA processing; protein glycosylation; protein O-linked glycosylation via mannose	mitochondrion; endoplasmic reticulum; membrane	mannosyltransferase activity; dolichyl-phosphate-mannose-protein mannosyltransferase activity; transferase activity
Kcnq4	20.7578	-0.248513	0.124175	-2.00131	0.0453586	0.251625	potassium voltage-gated channel, subfamily Q, member 4	ENSMUSG00000028631.7	60613	ENSMUSG00000028631	Cholinergic synapse	monoatomic ion transport; potassium ion transport; sensory perception of sound; monoatomic ion transmembrane transport; inner ear morphogenesis; transmembrane transport; potassium ion transmembrane transport	plasma membrane; voltage-gated potassium channel complex; basal plasma membrane; membrane; monoatomic ion channel complex	monoatomic ion channel activity; voltage-gated monoatomic ion channel activity; voltage-gated potassium channel activity; potassium channel activity
Apoa1	219212	-0.247757	0.0905679	-2.73559	0.00622678	0.0811755	apolipoprotein A-I	ENSMUSG00000032083.8	11806	ENSMUSG00000032083	PPAR signaling pathway; Fat digestion and absorption; Vitamin digestion and absorption; Cholesterol metabolism; African trypanosomiasis; Lipid and atherosclerosis	endothelial cell proliferation; negative regulation of cytokine production involved in immune response; lipid metabolic process; phospholipid metabolic process; phosphatidylcholine biosynthetic process; cholesterol biosynthetic process; lipid transport; G protein-coupled receptor signaling pathway; integrin-mediated signaling pathway; steroid metabolic process; cholesterol metabolic process; gluc…	extracellular region; extracellular space; cytosol; cell surface; endocytic vesicle; cytoplasmic vesicle; very-low-density lipoprotein particle; low-density lipoprotein particle; intermediate-density lipoprotein particle; high-density lipoprotein particle; discoidal high-density lipoprotein particle; spherical high-density lipoprotein particle; chylomicron; extracellular vesicle	amyloid-beta binding; signaling receptor binding; lipid transporter activity; protein binding; phospholipid binding; high-density lipoprotein particle binding; lipid binding; cholesterol binding; enzyme binding; heat shock protein binding; apolipoprotein receptor binding; apolipoprotein A-I receptor binding; identical protein binding; protein homodimerization activity; chemorepellent activity; re…
Mfap4	37.3796	-0.247731	0.197746	-1.25277	0.210289	0.539775	microfibrillar-associated protein 4	ENSMUSG00000042436.12	76293	ENSMUSG00000042436		cell adhesion; UV protection; regulation of collagen metabolic process; elastic fiber assembly; cellular response to UV-B; supramolecular fiber organization	microfibril; extracellular region; extracellular space; extracellular matrix; elastic fiber	extracellular matrix structural constituent
Tnfrsf18	17.0587	-0.247145	0.203668	-1.21347	0.22495	0.556952	tumor necrosis factor receptor superfamily, member 18	ENSMUSG00000041954.18	21936	ENSMUSG00000041954	Cytokine-cytokine receptor interaction	positive regulation of leukocyte migration; apoptotic process; tumor necrosis factor-mediated signaling pathway; negative regulation of apoptotic process; positive regulation of cell adhesion	extracellular region; plasma membrane; external side of plasma membrane; membrane	tumor necrosis factor receptor activity; protein binding
Nrbp2	1970.62	-0.247102	0.0949882	-2.60139	0.00928461	0.10201	nuclear receptor binding protein 2	ENSMUSG00000075590.2	223649	ENSMUSG00000075590		nervous system development; negative regulation of macroautophagy; neuron differentiation; intracellular signal transduction; negative regulation of neuron apoptotic process	cytoplasm; endomembrane system	protein kinase activity; protein serine/threonine kinase activity; ATP binding
Mycn	76.8251	-0.246947	0.203452	-1.21379	0.224829	0.556844	v-myc avian myelocytomatosis viral related oncogene, neuroblastoma derived	ENSMUSG00000037169.14	18109	ENSMUSG00000037169	Transcriptional misregulation in cancer	cartilage condensation; positive regulation of mesenchymal cell proliferation; regulation of DNA-templated transcription; regulation of transcription by RNA polymerase II; positive regulation of gene expression; negative regulation of gene expression; lung development; embryonic digit morphogenesis; positive regulation of programmed cell death; regulation of inner ear auditory receptor cell diffe…	nucleus; nucleoplasm; nucleolus	RNA polymerase II cis-regulatory region sequence-specific DNA binding; DNA-binding transcription factor activity, RNA polymerase II-specific; DNA-binding transcription activator activity, RNA polymerase II-specific; DNA binding; DNA-binding transcription factor activity; protein binding; kinase binding; protein dimerization activity; sequence-specific double-stranded DNA binding
Ahi1	24.3756	-0.24659	0.13395	-1.84092	0.0656335	0.301852	Abelson helper integration site 1	ENSMUSG00000019986.16	52906	ENSMUSG00000019986		morphogenesis of a polarized epithelium; positive regulation of receptor internalization; vesicle targeting; cell surface receptor protein tyrosine kinase signaling pathway; intracellular protein localization; positive regulation of gene expression; positive regulation of neuron projection development; vesicle-mediated transport; cell projection organization; cell differentiation; positive regula…	photoreceptor outer segment; cytoplasm; centrosome; centriole; cytoskeleton; cell-cell junction; adherens junction; cilium; MKS complex; ciliary basal body; cell projection; anchoring junction; non-motile cilium; photoreceptor distal connecting cilium	protein binding; identical protein binding
Cd24a	71.2439	-0.24651	0.127611	-1.93173	0.0533931	0.273171	CD24a antigen	ENSMUSG00000047139.8	12484	ENSMUSG00000047139	Efferocytosis; Hematopoietic cell lineage	response to hypoxia; cell activation; regulation of cytokine-mediated signaling pathway; response to molecule of bacterial origin; immature B cell differentiation; pre-B cell differentiation; immune system process; leukocyte migration involved in inflammatory response; positive regulation of T cell mediated immune response to tumor cell; positive regulation of inflammatory response to antigenic s…	plasma membrane; external side of plasma membrane; cell surface; membrane; motile cilium; microvillus membrane; membrane raft; synapse; ciliary membrane; side of membrane; presynapse	protein binding; protein kinase binding; carbohydrate binding; protein tyrosine kinase activator activity; Hsp70 protein binding; Hsp90 protein binding
Gm11955	24.8364	-0.246506	0.178813	-1.37856	0.168029	0.487407		ENSMUSG00000082364.1		ENSMUSG00000082364
Cyp2c50	23941.4	-0.246462	0.0987872	-2.49488	0.0125999	0.119545	cytochrome P450, family 2, subfamily c, polypeptide 50	ENSMUSG00000054827.12	107141	ENSMUSG00000054827	Steroid hormone biosynthesis; Arachidonic acid metabolism; Linoleic acid metabolism; Retinol metabolism; Metabolic pathways; Serotonergic synapse; Inflammatory mediator regulation of TRP channels; Chemical carcinogenesis - DNA adducts	arachidonate metabolic process; epoxygenase P450 pathway; xenobiotic catabolic process; linoleic acid metabolic process	cytoplasm; endoplasmic reticulum; endoplasmic reticulum membrane; plasma membrane; membrane; intracellular membrane-bounded organelle	monooxygenase activity; iron ion binding; arachidonate monooxygenase activity; arachidonate epoxygenase activity; steroid hydroxylase activity; retinoic acid 4-hydroxylase activity; oxidoreductase activity; oxidoreductase activity, acting on paired donors, with incorporation or reduction of molecular oxygen; oxidoreductase activity, acting on paired donors, with incorporation or reduction of mole…
4933431C10Rik	22.5596	-0.246319	0.164541	-1.49701	0.134391	0.437682	RIKEN cDNA 4933431C10 gene	ENSMUSG00000108923.1	71322	ENSMUSG00000108923
Tchh	36.5658	-0.245972	0.19619	-1.25374	0.209935	0.539379	trichohyalin	ENSMUSG00000052415.5	99681	ENSMUSG00000052415	Cornified envelope formation	intermediate filament organization	cornified envelope	calcium ion binding; protein-macromolecule adaptor activity; metal ion binding; transition metal ion binding
Mical1	37.154	-0.245844	0.111147	-2.21189	0.026974	0.188124	microtubule associated monooxygenase, calponin and LIM domain containing 1	ENSMUSG00000019823.17	171580	ENSMUSG00000019823		sulfur oxidation; actin filament depolymerization; negative regulation of apoptotic process; regulation of regulated secretory pathway	nucleoplasm; cytoplasm; endosome; cytosol; cytoskeleton; actin filament; plasma membrane; cilium; endosome membrane; membrane; midbody; ciliary basal body; intercellular bridge; plasma membrane bounded cell projection; hippocampal mossy fiber expansion	actin binding; monooxygenase activity; protein binding; NAD(P)H oxidase H2O2-forming activity; oxidoreductase activity; oxidoreductase activity, acting on paired donors, with incorporation or reduction of molecular oxygen, NAD(P)H as one donor, and incorporation of one atom of oxygen; SH3 domain binding; protein kinase binding; small GTPase binding; metal ion binding; FAD binding; F-actin monooxy…
Armcx4	33.0004	-0.245565	0.147218	-1.66804	0.0953087	0.365266	armadillo repeat containing, X-linked 4	ENSMUSG00000049804.9	100503043	ENSMUSG00000049804		biological_process	cellular_component	molecular_function
Zfp862-ps	96.4059	-0.245377	0.0845554	-2.90196	0.00370832	0.0585302	zinc finger protein 862, pseudogene	ENSMUSG00000107476.2	58894	ENSMUSG00000121879
Gm20033	17.0225	-0.245094	0.126637	-1.93541	0.0529399	0.271981		ENSMUSG00000097640.7	118568728	ENSMUSG00000097640
Odf3b	209.798	-0.244794	0.102862	-2.37984	0.0173202	0.145855		ENSMUSG00000047394.7
Izumo4	315.457	-0.244741	0.0966851	-2.53132	0.0113635	0.113798	IZUMO family member 4	ENSMUSG00000055862.6	71564	ENSMUSG00000055862		biological_process	extracellular region	molecular_function
[truncated: 12,877 more rows]

## Sheet: Supp Table 5
Supplementary table 5: Overall Pork to casein effect adjusted for diet
genename	baseMean	log2FoldChange	lfcSE	stat	pvalue	padj	Gene_fullname	sampleID	ENTREZID	EnsID	KEGG_category	Biological_Process	Cellular_Compartment	Metabolic_Function
[truncated: 13,562 more rows]

## Sheet: Supp Table 6
Supplementary table 6: HFHS only soy to casein effect
genename	baseMean	log2FoldChange	lfcSE	stat	pvalue	padj	Gene_fullname	sampleID	ENTREZID	EnsID	KEGG_category	Biological_Process	Cellular_Compartment	Metabolic_Function
[truncated: 13,562 more rows]

## Sheet: Supp Table 7
Supplementary table 7: HFHS only pork to casein effect
[truncated: 13,563 more rows]
